# Supplementary material for: Cross-sectional associations of housework with cognitive, physical and sensorimotor functions in younger and older community-dwelling adults: the Yishun Study
Source: PubMed Central journal article supplement — BMJ Open. 2021 Oct 26;11(11):e052557. doi: 10.1136/bmjopen-2021-052557 (PMC8638158; doi:10.1136/bmjopen-2021-052557), 2021-10-26
Supplement: bmjopen-2021-052557.draft_revisions.pdf [file bmjopen-2021-052557.draft_revisions.pdf]

# BMJ Open

BMJ Open is committed to open peer review. As part of this commitment we make the peer review history of every article we publish publicly available.

When an article is published we post the peer reviewers' comments and the authors' responses online. We also post the versions of the paper that were used during peer review. These are the versions that the peer review comments apply to.

The versions of the paper that follow are the versions that were submitted during the peer review process. They are not the versions of record or the final published versions. They should not be cited or distributed as the published version of this manuscript.

BMJ Open is an open access journal and the full, final, typeset and author-corrected version of record of the manuscript is available on our site with no access controls, subscription charges or pay-per-view fees (<http://bmjopen.bmj.com>).

If you have any questions on BMJ Open's open peer review process please email [info.bmjopen@bmj.com](mailto:info.bmjopen@bmj.com)

# BMJ Open

## Housework is associated with better cognitive, physical and sensorimotor functions in community-dwelling older adults – the Yishun Study.

|                               |                                                                                                                                                                                                                                                                                                                                                                                                                                                                                                                                                                                                                                                                    |
|-------------------------------|--------------------------------------------------------------------------------------------------------------------------------------------------------------------------------------------------------------------------------------------------------------------------------------------------------------------------------------------------------------------------------------------------------------------------------------------------------------------------------------------------------------------------------------------------------------------------------------------------------------------------------------------------------------------|
| Journal:                      | <i>BMJ Open</i>                                                                                                                                                                                                                                                                                                                                                                                                                                                                                                                                                                                                                                                    |
| Manuscript ID                 | bmjopen-2021-052557                                                                                                                                                                                                                                                                                                                                                                                                                                                                                                                                                                                                                                                |
| Article Type:                 | Original research                                                                                                                                                                                                                                                                                                                                                                                                                                                                                                                                                                                                                                                  |
| Date Submitted by the Author: | 19-Apr-2021                                                                                                                                                                                                                                                                                                                                                                                                                                                                                                                                                                                                                                                        |
| Complete List of Authors:     | Lee, Shuen Yee; Singapore Institute of Technology<br>Pang, Benedict Wei Jun; Geriatric Education and Research Institute Ltd<br>Lau, Lay Khoon; Geriatric Education and Research Institute Ltd<br>Jabbar, Khalid Abdul; Geriatric Education and Research Institute Ltd<br>Seah, Wei Ting; Geriatric Education and Research Institute Ltd<br>Chen, Kenneth Kexun; Geriatric Education and Research Institute Ltd<br>Ng, Tze Pin; National University of Singapore, Department of<br>Psychological Medicine; Geriatric Education and Research Institute Ltd<br>Wee, Shiou-Liang; Singapore Institute of Technology; Geriatric Education<br>and Research Institute Ltd |
| Keywords:                     | Health policy < HEALTH SERVICES ADMINISTRATION & MANAGEMENT,<br>GERIATRIC MEDICINE, PREVENTIVE MEDICINE, PUBLIC HEALTH                                                                                                                                                                                                                                                                                                                                                                                                                                                                                                                                             |
|                               |                                                                                                                                                                                                                                                                                                                                                                                                                                                                                                                                                                                                                                                                    |

SCHOLARONE™  
Manuscripts

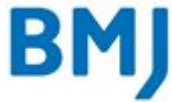

I, the Submitting Author has the right to grant and does grant on behalf of all authors of the Work (as defined in the below author licence), an exclusive licence and/or a non-exclusive licence for contributions from authors who are: i) UK Crown employees; ii) where BMJ has agreed a CC-BY licence shall apply, and/or iii) in accordance with the terms applicable for US Federal Government officers or employees acting as part of their official duties; on a worldwide, perpetual, irrevocable, royalty-free basis to BMJ Publishing Group Ltd ("BMJ") its licensees and where the relevant Journal is co-owned by BMJ to the co-owners of the Journal, to publish the Work in this journal and any other BMJ products and to exploit all rights, as set out in our [licence](#).

The Submitting Author accepts and understands that any supply made under these terms is made by BMJ to the Submitting Author unless you are acting as an employee on behalf of your employer or a postgraduate student of an affiliated institution which is paying any applicable article publishing charge ("APC") for Open Access articles. Where the Submitting Author wishes to make the Work available on an Open Access basis (and intends to pay the relevant APC), the terms of reuse of such Open Access shall be governed by a Creative Commons licence – details of these licences and which [Creative Commons](#) licence will apply to this Work are set out in our licence referred to above.

Other than as permitted in any relevant BMJ Author's Self Archiving Policies, I confirm this Work has not been accepted for publication elsewhere, is not being considered for publication elsewhere and does not duplicate material already published. I confirm all authors consent to publication of this Work and authorise the granting of this licence.

1  
2  
3  
4 **Title:** Housework is associated with better cognitive, physical and sensorimotor  
5  
6 functions in community-dwelling older adults – the Yishun Study.  
7  
8  
9

10  
11 Shuen Yee Lee, PhD<sup>a</sup>, Benedict Wei Jun Pang, BSc<sup>b</sup>, Lay Khoon Lau, PhD<sup>b</sup>, Khalid  
12  
13 Abdul Jabbar, MSc<sup>b</sup>, Wei Ting Seah, MSc<sup>b</sup>, Kenneth Kexun Chen, BSc<sup>b</sup>, Tze Pin Ng,  
14  
15 MD<sup>b,c</sup>, Shiou-Liang Wee, PhD<sup>a,b</sup>  
16  
17  
18  
19

20 <sup>a</sup>Faculty of Health and Social Sciences, Singapore Institute of Technology, 10 Dover  
21  
22 Drive, Singapore 138683, Singapore, Singapore  
23  
24

25 <sup>b</sup>Geriatric Education and Research Institute, 2 Yishun Central 2, Singapore 768024,  
26  
27 Singapore, Singapore  
28

29 <sup>c</sup>Department of Psychological Medicine, National University of Singapore, 21 Lower  
30  
31 Kent Ridge Rd, Singapore 119077, Singapore, Singapore  
32  
33  
34  
35  
36

37 **Corresponding author:** Shiou-Liang Wee, Geriatric Education and Research  
38  
39 Institute (GERI), 2 Yishun Central 2, Tower E Level 4 GERI Admin, 768024,  
40  
41 Singapore. Phone: +65 65924606, Email: [weeshiuliang@gmail.com](mailto:weeshiuliang@gmail.com)  
42  
43  
44  
45  
46  
47  
48  
49  
50  
51  
52  
53  
54  
55  
56  
57  
58  
59  
60

## Abstract

**Introduction:** Regular moderate-to-vigorous intensity recreational physical activity (PA) protects against ill health. The relationship between non-recreational PA with ageing health is less explored, especially in high income countries. We examined the associations between housework and functional health among younger and older Singaporean community-dwelling adults.

**Methods:** Younger (<65yrs, n=249) and older (≥65yrs, n=240) adults were randomly recruited cross-sectionally from a large Singapore residential town. Light (LH) and heavy housework (HH), recreational, occupational and transport-related PA were assessed using PA questionnaires. Participants were dichotomised into low- and high-volume LH and HH groups. Physical, cognitive and sensorimotor functions were measured using Short Physical Performance Battery, repeated-chair-sit-to-stand, gait speed, Repeatable Battery for the Assessment of Neuropsychological Status (RBANS) and Physiological Profile Assessment (PPA). Results were adjusted for level of recreational and other non-recreational PA.

**Results:** High housework groups had 5–8% higher RBANS score than low housework groups, among older adults only. Specifically, HH was associated with 14% higher attention score, and LH with 8–12% higher immediate/delayed memory scores. In older adults, sit-to-stand-time and PPA scores were 8% and 23% lower in high HH than low HH group. SPPB and gait speed did not differ with age or HH. LH was not associated with physical or sensorimotor function.

**Conclusion:** Among older adults, housework is associated with better cognitive function, specifically in attention and memory. Associations between housework with physical and sensorimotor performance were intensity-dependent. In Singapore,

1  
2  
3 housework PA may improve functional health among community-dwelling older  
4  
5 adults, independent of recreation and other non-recreational physical activities.  
6  
7

8  
9 **Key words:** Housework intensity, Functional health, High-income countries, Ageing,  
10  
11 Household chores, Non-recreational physical activity  
12  
13  
14  
15  
16  
17  
18  
19  
20  
21  
22  
23  
24  
25  
26  
27  
28  
29  
30  
31  
32  
33  
34  
35  
36  
37  
38  
39  
40  
41  
42  
43  
44  
45  
46  
47  
48  
49  
50  
51  
52  
53  
54  
55  
56  
57  
58  
59  
60

For peer review only

## Article Summary

### Strengths and limitations of this study

- Most research in high-income countries focused on the effects and intensity of recreational physical activity on functional health, but non-recreational physical activity such as housework tasks are a large part of everyday activities in older people, and may affect multitude of health outcomes.
- This study demonstrates, for the first time, housework is associated with better cognitive, physical and sensorimotor functions in older adults, independent of recreational, occupational and transport-related physical activities, even in high-income countries like Singapore.
- Results indicating that incorporating physical activity into daily lifestyle through domestic duties (i.e., housework) has the potential to achieve higher physical activity can be used by policymakers to promote healthier ageing.
- This study is cross-sectional; therefore, associations between housework and functional health in older adults do not necessarily reflect causality.
- Housework activities were self-reported and not objectively measured.

## Introduction

Regular physical activity (PA) improves physical and mental health, mitigates the risks and effects of chronic diseases, and reduces falls, immobility, dependency and mortality among older adults <sup>1</sup>. Yet, prevalence of insufficient PA was 27·5% globally, and was more than double in high-income countries than low-income countries (36·8% vs 16·2%) <sup>2</sup>. Among the high-income Asia Pacific countries, the prevalence of insufficient PA was highest in Singapore at 36·5% <sup>2</sup>.

In wealthier countries, transition towards more sedentary occupations and motorised transportation could explain the higher levels of inactivity. The majority of PA in high-income countries are from recreational PA, which differed from low-income countries where PA is predominantly from non-recreational activities, including transportation, occupational and housework <sup>2,3</sup>. Furthermore, the prevalence of insufficient PA has increased by ~5% in high-income countries between 2001 and 2016 <sup>3</sup>, suggesting that better strategies are required to increase PA, especially among older adults, due to their increased vulnerability to adverse health outcomes <sup>4</sup>.

Earlier studies in high-income countries largely focused on the effects of recreational PA on physical and mental capacities, which are key risk factors for falls among older adults <sup>5-7</sup>. Few studies have examined the independent effects of non-recreational activity, such as housework tasks, on age-associated decline in functional ability. Furthermore, although the effects of exercise intensity have been widely investigated <sup>1</sup>, there was no study on the associations between housework intensity and age-associated functional health. With the rapidly ageing population



1  
2  
3 and increasing life expectancy worldwide, approaches to promote healthy ageing,  
4 which centres upon the maintenance of functional ability, are urgently needed <sup>8</sup>.  
5  
6  
7  
8  
9

10 Housework activities are a large part of everyday activities in older people, and  
11 account for a significant proportion of self-reported PA <sup>9</sup>. Other than a meaningful  
12 occupation, housework is also a component of instrumental activities of daily living –  
13 both key factors of successful ageing. Additionally, acute and chronic housework are  
14 associated with improved cognition, brain volume and executive function, and  
15 negatively associated with frailty <sup>10-12</sup>. Regardless of country income levels, higher  
16 levels of non-recreational PA were associated with a graded reduction in mortality  
17 and cardiovascular diseases, suggesting the important role of non-recreational PA  
18 such as housework, on improving health outcomes even in high-income countries <sup>3</sup>.  
19 Housework may also confer benefits on physical and mental function among older  
20 adults in a high-income country such as Singapore. Therefore, we studied the  
21 associations between light and heavy housework activities, with cognitive, physical  
22 and sensorimotor function, among younger and older adults in Singapore.  
23  
24  
25  
26  
27  
28  
29  
30  
31  
32  
33  
34  
35  
36  
37  
38  
39  
40  
41  
42

## 43 **Methods**

### 44 Settings

45  
46 Community-dwelling adults ( $\geq 21$  years) were recruited from a large north-eastern  
47 residential town of Yishun in Singapore, with residential population of 220,320  
48 (50.6% females), with 12.2% older adults ( $\geq 65$  years). This is similar to the overall  
49 Singapore residential population of 4,044,200 (51.1% females), with 15.2% older  
50 adults ( $\geq 65$  years) <sup>13</sup>.  
51  
52  
53  
54  
55  
56  
57  
58  
59  
60

## Participants

Participants were recruited cross-sectionally from the Yishun Study through random sampling, in quotas of 20 to 40 participants in each sex and age group (10-year age groups between 21–60 years old and 5-year age groups after 60 years), to obtain a representative sample of ~300 men and ~300 women<sup>14</sup>. Briefly, community-dwelling adults aged 21 years and above who were independent in performing activities of daily living, had <5 comorbidities, and no neuromuscular or cognitive disorders were recruited. Those between 21–64 years and 65–90 years in age were categorized as younger and older participants respectively. Participants self-reported their years of education and medical conditions and comorbidities. Ethics approval was obtained from the National Healthcare Group DSRB (2017/00212), in accordance with the relevant guidelines from the Declaration of Helsinki and the ethical principles in the Belmont Report. All participants gave written informed consent.

## Patient and public involvement

Neither patients nor the public were involved in the design, planning, conduct or reporting of this study.

## Anthropometric assessment

Body weight and height were measured using an electronic scale and stadiometer respectively (SECA, Hamburg, Germany). Body mass index was calculated as body weight (kg) divided by height (m) squared.

### Housework and PA

Data on housework were self-reported and collected according to the Longitudinal Ageing Study Amsterdam PA questionnaire (LAPAQ)<sup>15</sup>, which consists of frequency and time spent on light and heavy household tasks. Light housework tasks (LH) included washing the dishes, dusting, making the bed, doing the laundry, hanging out the laundry, ironing, tidying up, and cooking meals. Heavy housework tasks (HH) included window cleaning, changing beddings, beating the mat, vacuuming, washing or scrubbing the floor, and chores involving sawing, carpeting, repairing or painting. The median time spent per week on household activities was used to dichotomize participants into high and low groups for LH (315 min/week) and HH (15 min/week) groups. Light housework was assigned a metabolic equivalent of task (MET) of 2.5 and heavy housework was assigned a MET of 4.0<sup>16</sup>.

Recreational (sport, fitness or leisure time activities), transport (active commuting/travel) and occupational (work) PA was determined using the Global Physical Activity Questionnaire (GPAQ), which consists of questions assessing the frequency and duration of vigorous- or moderate-intensity activities during a typical week<sup>17</sup>. A cut-off of  $\geq 600$  MET minutes/week ( $\geq 150$  min/week of moderate-intensity or  $\geq 75$  min/week of vigorous-intensity PA) was used to determine percentage of participants who met the current PA guidelines<sup>3,18</sup>.

### Cognitive function

Cognitive performance was assessed by the Repeatable Battery for the Assessment of Neuropsychological Status (RBANS). RBANS is a standardized age-adjusted

1  
2  
3 battery that is sensitive to cognitive impairment<sup>19</sup>. RBANS assesses global and  
4  
5 specific cognitive domains including immediate and delayed memory, visuospatial-  
6  
7 construction, language, and attention.  
8  
9

### 10 11 12 Physical function

13  
14 Habitual gait speed was assessed using a 6m GAITRite Walkway (CIR Systems Inc,  
15  
16 Sparta, NJ) with 2m lead in and out phase. Participants performed three trials and  
17  
18 the average timing was recorded. The Short Physical Performance Battery (SPPB)  
19  
20 consists of 3 subtests including balance, gait and sit-to-stand<sup>14,20</sup>. The balance  
21  
22 subtest composed of 3 parts with progressive difficulty, including unaided feet-  
23  
24 together stand, semi-tandem stand and full-tandem stand. Participants were timed  
25  
26 until they moved or 10s elapsed time. Gait speed was assessed by participants  
27  
28 walking 8ft at their usual pace, with a moving start<sup>20</sup>. The average timing was  
29  
30 recorded over two trials. To assess sit-to-stand time, participants folded their arms  
31  
32 across their chest and performed five chair stands as quickly as possible. Each of  
33  
34 the 3 subtests was scored from 0–4 and the total score was the sum of 3 subtests,  
35  
36 ranging from 0–12. Higher SPPB scores indicated better physical function<sup>20</sup>.  
37  
38  
39  
40  
41  
42  
43  
44

### 45 Sensorimotor or Physiological falls risk assessments

46  
47 Physiological falls risk was determined using the physiological profile assessment  
48  
49 (PPA) short version, which has been shown to predict fall incidents and consists of  
50  
51 five validated sensorimotor measures: visual contrast sensitivity, hand reaction time,  
52  
53 knee extension strength, proprioception and postural sway<sup>21,22</sup>. The five measures  
54  
55 were weighted to compute a composite PPA index score using the NeuRA  
56  
57  
58  
59  
60

1  
2  
3 FallScreen® Falls Risk Calculator (<https://fbirc.neura.edu.au/fallscreen>). Higher PPA  
4  
5 scores indicates poorer sensorimotor performance and greater falls risk <sup>21,22</sup>.  
6  
7  
8  
9

### 10 Statistical analysis

11  
12 All statistical analyses were performed using R version 3.6.2 (R Foundation for  
13  
14 statistical computing, Vienna, Austria). A sample size of 400 (100 per group) was  
15  
16 needed for the trial to have 80% power to detect a two-sided hypothesis test at an  $\alpha$   
17  
18 level of 0.05 (effect size of 0.2) (G\*Power, version 3.1, Germany). All participants  
19  
20 with completed outcome measures were included for analysis. Numerical variables  
21  
22 are presented as mean (standard deviation, SD) in text and figures unless otherwise  
23  
24 stated. Participant characteristics were analyzed using independent samples t-test to  
25  
26 assess potential differences between high and low HH and LH groups.  
27  
28

29  
30 Sensorimotor, cognitive and physical function measures were analyzed using two-  
31  
32 way analysis of variance (ANOVA) for HH and LH independently, with age group  
33  
34 (younger vs older), housework groups (low vs high), and their interaction  
35  
36 (age\*housework) as fixed effects. A value of  $p < 0.05$  was considered statistically  
37  
38 significant.  
39  
40  
41  
42  
43  
44  
45

## 46 **Results**

### 47 Participant characteristics

48  
49 A total of 249 participants (57% women) with mean age of 44 years (SD 14 years) in  
50  
51 the younger group, and 240 participants (57.1% women) with mean age of 75 years  
52  
53 (SD 6 years) in the older group were included in the analysis. Ethnic distribution of  
54  
55 participants (82.0% Chinese, 8.4% Malay, 6.7% Indians, and 2.9% from other races)  
56  
57 was similar to that of Singapore's population <sup>13</sup>. A total of 36% and 48% of the  
58  
59  
60

1  
2  
3 participants in the younger and older group respectively, met the recommended PA  
4 level derived exclusively from recreational PA<sup>18</sup>. These values were lower than 61%  
5 and 66% of the younger and older participants respectively, who attained the  
6 recommended PA level exclusively through housework activities.  
7  
8  
9  
10  
11  
12

13  
14 Participant demographics between high and low HH and LH groups, such as age,  
15 education, anthropometric, PA and housework data, are summarised in Table 1.

16  
17 Within the younger group, high LH group were shorter and had less years of  
18 education than low LH group (all  $p < 0.001$ , Table 1). Total, recreational and  
19 occupational PA did not differ between high and low HH and LH groups in younger  
20 and older adults (all  $p > 0.05$ , Table 1). Within the younger but not the older group,  
21 transport-related PA was 39% lower in low LH than high LH group ( $p = 0.003$ , Table  
22 1). Regardless of age group, compared with low HH and LH groups, participants in  
23 the high HH and LH groups spent more time on both light and heavy housework  
24 activities per week and had higher total housework MET min/week (all  $p < 0.001$ ,  
25 Table 1).  
26  
27  
28  
29  
30  
31  
32  
33  
34  
35  
36  
37  
38  
39  
40  
41

42 For subsequent light housework analyses, age, sex, height, education, transport PA  
43 and heavy housework were included in the model to adjust for confounding  
44 variables. To adjust for confounding factors, age, sex and light housework were  
45 included in model for subsequent heavy housework analyses. Adjusting for  
46 recreational and occupational PA in the analyses did not affect any of the results  
47 presented; hence, data are presented with recreational and occupational PA  
48 excluded from the model.  
49  
50  
51  
52  
53  
54  
55  
56  
57  
58  
59  
60

### Association of heavy housework activities with cognitive function

Within the older group, global cognition was 8% higher in the high HH than low HH group ( $p=0.012$ ), but did not differ between high and low HH groups among the younger individuals ( $p=0.630$ ) (age\*housework; $p=0.031$ , Fig 1a). Attention index score was 14% higher in the high HH than low HH group within the older ( $p=0.014$ ) but not the younger ( $p=0.304$ ) group (age\*housework; $p=0.012$ , Fig 1d). Immediate memory index scores between high and low HH groups were not statistically significant among older ( $p=0.055$ ) and younger adults ( $p=0.332$ ), despite significant interaction effects (age\*housework; $p=0.038$ , Fig 1b). No significant interaction effects between age and HH groups were observed for delayed memory ( $p=0.108$ ), visuospatial-construction ( $p=0.183$ ) and language index scores ( $p=0.776$ ) (Fig 1c,e&f).

### Association of heavy housework activities with physical and sensorimotor function

The interaction effects between age and HH groups were not significant for total SPPB score ( $p=0.155$ , Fig 2a) and gait speed ( $p=0.482$ , Fig 2b). Within the older but not the younger group, sit-to-stand time was 8% lower in the high HH than low HH group ( $p=0.011$  vs  $p=0.722$ ) (age\*housework; $p=0.036$ , Fig 2c). PPA index score was 23% lower in the high HH than low HH group, among the older adults ( $p=0.040$ ), but not the younger adults ( $p=0.477$ ) (age\*housework; $p=0.046$ , Fig 2d).

### Association of light housework activities with cognitive function

Compared with low LH group, high LH group had 5% higher global cognition score among the older but not the younger adults ( $p=0.016$  vs  $p=0.335$ ) (age\*housework; $p=0.015$ , Fig 3a). Within the older but not the younger individuals,

1  
2  
3 immediate and delayed memory index scores were also 12% ( $p < 0.001$  vs  $p = 0.165$ )  
4 and 8% ( $p = 0.004$  vs  $p = 0.729$ ) higher in high LH than low LH group respectively  
5  
6 (age\*housework;  $p < 0.001$  and  $p = 0.022$ , Fig 3b&c). No significant interaction effects  
7  
8 between age and LH groups were observed for attention ( $p = 0.194$ ), visuospatial-  
9  
10 construction ( $p = 0.781$ ) and language index scores ( $p = 0.318$ ) (Fig 3d–f).  
11  
12  
13  
14  
15  
16

### 17 Association of light housework activities with physical and sensorimotor function

18  
19 The interaction effects between age and LH groups were not significant for total  
20  
21 SPPB score ( $p = 0.709$ ), gait speed ( $p = 0.136$ ), sit-to-stand ( $p = 0.445$ ) (Fig 4a–c). PPA  
22  
23 index scores between high and low LH groups were not statistically significant  
24  
25 among older ( $p = 0.067$ ) and younger adults ( $p = 0.178$ ), despite significant interaction  
26  
27 effects (age\*housework;  $p = 0.021$ , Fig 4d).  
28  
29  
30  
31  
32  
33

## 34 **Discussion**

35  
36 The present study is the first to report that housework activity is associated with  
37  
38 cognitive, physical and sensorimotor functions among older but not younger adults in  
39  
40 Singapore. We show that more adults attained recommended physical activity levels  
41  
42 through housework than recreation. Furthermore, higher levels of housework activity  
43  
44 are associated with better cognition in older adults. Higher levels of heavy, but not  
45  
46 light housework, were independently associated with better physical and  
47  
48 sensorimotor functions in older adults only. These positive associations of  
49  
50 housework with functional performance in older adults were independent of  
51  
52 recreational, occupational and transport-related physical activities. Our results  
53  
54 suggest that in addition to other forms of PA, housework may also confer benefits on  
55  
56 functional health in older adults from a high-income country.  
57  
58  
59  
60



1  
2  
3  
4  
5  
6 Regardless of intensity, higher levels of housework activities were associated with  
7 improved global cognition, among our population of older adults. In agreement with  
8 our findings, lower levels of housework activities were associated with mild cognitive  
9 impairment, cognitive decline and lower grey matter volume among older adults  
10 <sup>11,23,24</sup>, suggesting that housework activities may have cognitive benefits, possibly  
11 through an increase in brain volume, as observed with exercise <sup>25</sup>. However, the  
12 positive associations between housework and cognition were not apparent in  
13 younger adults in our population. Differences in years of education between younger  
14 and older adults likely explain the disparity. Compared with older adults, younger  
15 adults in this study had five more years of education on average. Since education  
16 level is positively associated with baseline cognitive function and slower cognitive  
17 decline <sup>26</sup>, it is plausible that higher education levels and cognitive function in  
18 younger adults decreases the potential for housework-related cognitive  
19 improvements. Our study findings support that among the community-dwelling older  
20 adults with fewer education years, housework might ameliorate age-associated  
21 cognitive decline, even in high-income countries.

22  
23  
24  
25  
26  
27  
28  
29  
30  
31  
32  
33  
34  
35  
36  
37  
38  
39  
40  
41  
42  
43  
44  
45 Nonetheless, our results demonstrate that the intensity of housework affected  
46 different cognitive domains. Heavy housework was associated with improvements in  
47 the attention domain, while light housework was associated with improvements in  
48 both delayed and immediate memory domains in older adults. While none of the  
49 studies have investigated the associations between housework intensity and specific  
50 cognitive domains, earlier studies reported that aerobic exercise interventions of  
51 varying intensities improved specific cognitive function domains, including executive  
52  
53  
54  
55  
56  
57  
58  
59  
60

1  
2  
3 and motor function, attention and memory, through an increase in hippocampal  
4 volume and brain-derived neurotrophic factor expression <sup>27-29</sup>. Given that housework  
5 accounted for a significant proportion (~24–36%) of self-reported moderate-to-  
6 vigorous-intensity PA among older adults, it is plausible that housework improves  
7 cognition through a similar mechanism as PA or exercise <sup>9</sup>. These results support  
8 that a combination of light and heavy housework tasks may improve age-associated  
9 decline in cognitive function, specifically for attention and memory domains. More  
10 studies are required to understand the underlying mechanisms driving the differing  
11 associations of housework intensity with specific cognitive domains.  
12  
13  
14  
15  
16  
17  
18  
19  
20  
21  
22  
23  
24  
25

26 Poorer cognitive performance in attention and executive functions were associated  
27 with poorer physical function, slower gait, postural instability and future falls among  
28 community-dwelling older adults <sup>30-32</sup>. We show that higher levels of heavy  
29 housework activities were also independently associated with better sensorimotor  
30 performance and chair-stand time in older but not younger adults. Our results  
31 suggest that apart from improving cognitive function, heavy housework likely benefits  
32 physical and sensorimotor performance, which could in turn reduce physiological  
33 falls risk. While the effects of housework on falls are less clear, exercise  
34 interventions improved both physical and cognitive functions, and reduced rate of  
35 falls in community-dwelling older adults with or without cognitive impairment,  
36 suggesting that the favourable effects of exercise on physical function and falls were  
37 independent of cognitive function <sup>5-7</sup>. Furthermore, longer chair-stand time and  
38 poorer cognitive performance (processing speed and executive function)  
39 independently increased the risk of injurious falls over 3–10 years by 10–23%,  
40 among older Swedish adults <sup>33</sup>. These results collectively suggest that similar to  
41  
42  
43  
44  
45  
46  
47  
48  
49  
50  
51  
52  
53  
54  
55  
56  
57  
58  
59  
60

1  
2  
3 exercise, the associated improvement in physical and cognitive functions with heavy  
4  
5 housework may independently reduce risk of falls among community-dwelling older  
6  
7 adults.  
8  
9

10  
11  
12 We compared the independent associations of light and heavy housework activities,  
13  
14 and demonstrated that unlike heavy housework, light housework was not associated  
15  
16 with better physical or sensorimotor function. The lack of associations could be due  
17  
18 to the already high functional ability of our study participants <sup>14</sup>. In support, compared  
19  
20 with lower intensity exercise, greater improvements in functional ability and  
21  
22 decreased fear of falling were observed after high intensity exercise in older adults  
23  
24 <sup>34-36</sup>. These results indicate a dose-response effect for exercise intensity on physical  
25  
26 function and falls risk in older adults. Similarly, we propose that the associations  
27  
28 between housework with better physical and sensorimotor function is dependent on  
29  
30 intensity, especially in community-dwelling older adults.  
31  
32  
33  
34  
35  
36  
37

38 Notably, regardless of age group, a higher percentage (18–25%) of study  
39  
40 participants met the PA guidelines derived exclusively from housework, than that  
41  
42 attained solely through recreational PA. This finding reflects the challenges inherent  
43  
44 with recreational PA participation, which is by definition, done during discretionary  
45  
46 hours of the day outside of occupational and domestic duties. Incorporating PA into  
47  
48 daily lifestyle through domestic duties (i.e., housework) has the potential to achieve  
49  
50 higher PA, which is associated with improved functional health especially among  
51  
52 older community-dwelling adults.  
53  
54  
55  
56  
57  
58  
59  
60

1  
2  
3 Our study recruited adults aged 21–80+ randomly from a large residential town  
4 representative of Singapore’s population, suggesting a good degree of  
5  
6 generalisability. We also included a comparison between older and younger adults in  
7  
8 the study, to elucidate the age-associated effects of housework activities on  
9  
10 cognitive, physical and sensorimotor function. However, although associations can  
11  
12 be drawn from the study results, the cross-sectional design does not prove causality.  
13  
14 It is plausible that healthier older adults with higher functional ability engaged in  
15  
16 higher levels of housework. Nonetheless, in a 13-year follow-up study, productive  
17  
18 housework activities such as cooking and shopping were associated with lower  
19  
20 mortality risk in older adults <sup>37</sup>, suggesting that housework activities likely improve  
21  
22 health in older adults. The study findings cannot be generalised to people living in  
23  
24 institutions. In the present study, housework and PA measures were self-reported  
25  
26 based on type, intensity, frequency and duration per week. Although the LAPAQ and  
27  
28 GPAQ used in this study is valid and reliable <sup>15,17</sup>, future studies using more  
29  
30 objective measures of housework and PA should be undertaken. It is possible that  
31  
32 socio-economic status may mediate the effects of housework on health <sup>38</sup>, which  
33  
34 should be further examined in the Asian cultural context.  
35  
36  
37  
38  
39  
40  
41  
42  
43  
44  
45

46 In conclusion, our study suggests that a combination of light and heavy housework is  
47  
48 associated with better cognition, specifically in attention and memory domains,  
49  
50 among community-dwelling older adults. Furthermore, the associations of housework  
51  
52 levels with better physical and sensorimotor functions in older adults were intensity-  
53  
54 dependent. Housework may also complement recreational physical activities among  
55  
56 current older community-dwelling adults in high-income countries towards healthier  
57  
58 aging.  
59  
60

## Funding

This research was supported by Geriatric Education and Research Institute (GERI) intramural funding - GERI 1609.

## Acknowledgements

The authors gratefully acknowledge the strong support of Prof. Pang Weng Sun in making this Yishun Study possible, and the support of Daniella Ng, Queenie Tan, Dr. Lilian Chye, Sylvia Ngu Siew Ching, Aizuriah Mohamed Ali, Mary Ng Pei Ern, Chua Xing Ying and Shermaine Thein in this study.

## Contributions

SYL performed the data analysis, interpretation, visualisation and wrote the manuscript. SLW, TPN, BWJP and LKL contributed to the study concept and design. BWJP, LKL, KAJ, WTS, KKC administered the project and collected the data. BWJP, LKL accessed and verified the underlying data. SLW, TPN contributed to the critical revision of the manuscript for important intellectual content. All authors read and approved the final manuscript.

## Declaration of Interest

None declared.

### Data sharing statement

The datasets used and/or analysed during the current study are available from the corresponding author SLW on reasonable request.

For peer review only

## References

1. McPhee JS, French DP, Jackson D, Nazroo J, Pendleton N, Degens H. Physical activity in older age: perspectives for healthy ageing and frailty. *Biogerontology* 2016; **17**(3): 567-80.
2. Guthold R, Stevens GA, Riley LM, Bull FC. Worldwide trends in insufficient physical activity from 2001 to 2016: a pooled analysis of 358 population-based surveys with 1&#xb7;9 million participants. *The Lancet Global Health* 2018; **6**(10): e1077-e86.
3. Lear SA, Hu W, Rangarajan S, et al. The effect of physical activity on mortality and cardiovascular disease in 130 000 people from 17 high-income, middle-income, and low-income countries: the PURE study. *Lancet* 2017; **390**(10113): 2643-54.
4. Cunningham C, R OS, Caserotti P, Tully MA. Consequences of physical inactivity in older adults: A systematic review of reviews and meta-analyses. *Scand J Med Sci Sports* 2020; **30**(5): 816-27.
5. Sherrington C, Michaleff ZA, Fairhall N, et al. Exercise to prevent falls in older adults: an updated systematic review and meta-analysis. *Br J Sports Med* 2017; **51**(24): 1750-8.
6. Lam FM, Huang MZ, Liao LR, Chung RC, Kwok TC, Pang MY. Physical exercise improves strength, balance, mobility, and endurance in people with cognitive impairment and dementia: a systematic review. *J Physiother* 2018; **64**(1): 4-15.
7. García-Hermoso A, Ramirez-Vélez R, Sáez de Asteasu ML, et al. Safety and Effectiveness of Long-Term Exercise Interventions in Older Adults: A Systematic Review and Meta-analysis of Randomized Controlled Trials. *Sports Med* 2020; **50**(6): 1095-106.

- 1  
2  
3 8. Beard JR, Officer A, de Carvalho IA, et al. The World report on ageing and  
4 health: a policy framework for healthy ageing. *Lancet* 2016; **387**(10033): 2145-  
5  
6 54.  
7
- 8  
9  
10 9. Murphy MH, Donnelly P, Breslin G, Shibli S, Nevill AM. Does doing housework  
11 keep you healthy? The contribution of domestic physical activity to meeting  
12 current recommendations for health. *BMC Public Health* 2013; **13**: 966.  
13  
14
- 15  
16 10. Stephan AJ, Strobl R, Müller M, et al. A high level of household physical activity  
17 compensates for lack of leisure time physical activity with regard to deficit  
18 accumulation: Results from the KORA-Age study. *Prev Med* 2016; **86**: 64-9.  
19  
20
- 21  
22 11. Koblinsky ND, Meusel L-AC, Greenwood CE, Anderson ND. Household physical  
23 activity is positively associated with gray matter volume in older adults. *BMC*  
24 *Geriatrics* 2021; **21**(1): 104.  
25  
26
- 27  
28 12. Tsuchiya K, Mitsui S, Fukuyama R, et al. An acute bout of housework activities  
29 has beneficial effects on executive function. *Neuropsychiatr Dis Treat* 2018; **14**:  
30  
31 61-72.  
32  
33
- 34  
35 13. Singapore DoS. Population and Population Structure. 2020.  
36  
37  
38 [https://www.singstat.gov.sg/find-data/search-by-theme/population/population-](https://www.singstat.gov.sg/find-data/search-by-theme/population/population-and-population-structure/latest-data)  
39  
40 [and-population-structure/latest-data](https://www.singstat.gov.sg/find-data/search-by-theme/population/population-and-population-structure/latest-data) (accessed 25 March 2021 2021).  
41  
42  
43
- 44  
45 14. Lee SY, Choo PL, Pang BWJ, et al. SPPB reference values and performance in  
46 assessing sarcopenia in community-dwelling Singaporeans – Yishun study. *BMC*  
47 *Geriatrics* 2021; **21**(1): 213.  
48  
49
- 50  
51 15. Stel VS, Smit JH, Pluijm SM, Visser M, Deeg DJ, Lips P. Comparison of the  
52 LASA Physical Activity Questionnaire with a 7-day diary and pedometer. *J Clin*  
53 *Epidemiol* 2004; **57**(3): 252-8.  
54  
55  
56  
57  
58  
59  
60



- 1  
2  
3 16. Siebeling L, Wiebers S, Beem L, Puhan MA, Ter Riet G. Validity and  
4  
5 reproducibility of a physical activity questionnaire for older adults: questionnaire  
6  
7 versus accelerometer for assessing physical activity in older adults. *Clin*  
8  
9 *Epidemiol* 2012; **4**: 171-80.
- 10  
11  
12 17. Bull FC, Maslin TS, Armstrong T. Global physical activity questionnaire (GPAQ):  
13  
14 nine country reliability and validity study. *J Phys Act Health* 2009; **6**(6): 790-804.
- 15  
16  
17 18. Haskell WL, Lee IM, Pate RR, et al. Physical activity and public health: updated  
18  
19 recommendation for adults from the American College of Sports Medicine and  
20  
21 the American Heart Association. *Med Sci Sports Exerc* 2007; **39**(8): 1423-34.
- 22  
23  
24 19. Randolph C, Tierney MC, Mohr E, Chase TN. The Repeatable Battery for the  
25  
26 Assessment of Neuropsychological Status (RBANS): preliminary clinical validity.  
27  
28 *J Clin Exp Neuropsychol* 1998; **20**(3): 310-9.
- 29  
30  
31 20. Guralnik JM, Ferrucci L, Simonsick EM, Salive ME, Wallace RB. Lower-extremity  
32  
33 function in persons over the age of 70 years as a predictor of subsequent  
34  
35 disability. *N Engl J Med* 1995; **332**(9): 556-61.
- 36  
37  
38 21. Lord SR, Ward JA, Williams P, Anstey KJ. Physiological factors associated with  
39  
40 falls in older community-dwelling women. *J Am Geriatr Soc* 1994; **42**(10): 1110-  
41  
42 7.
- 43  
44  
45 22. Lord SR, Menz HB, Tiedemann A. A Physiological Profile Approach to Falls Risk  
46  
47 Assessment and Prevention. *Physical Therapy* 2003; **83**(3): 237-52.
- 48  
49  
50 23. Jiang C, Xu Y. The association between mild cognitive impairment and doing  
51  
52 housework. *Aging Ment Health* 2014; **18**(2): 212-6.
- 53  
54  
55 24. Peng Z, Jiang H, Wang X, et al. The Efficacy of Cognitive Training for Elderly  
56  
57 Chinese Individuals with Mild Cognitive Impairment. *Biomed Res Int* 2019; **2019**:  
58  
59 4347281.
- 60

- 1  
2  
3 25. Erickson KI, Leckie RL, Weinstein AM. Physical activity, fitness, and gray matter  
4 volume. *Neurobiology of Aging* 2014; **35**: S20-S8.  
5  
6
- 7  
8 26. Clouston SAP, Smith DM, Mukherjee S, et al. Education and Cognitive Decline:  
9 An Integrative Analysis of Global Longitudinal Studies of Cognitive Aging. *The  
10 Journals of Gerontology: Series B* 2020; **75**(7): e151-e60.  
11  
12
- 13  
14 27. Angevaren M, Aufdemkampe G, Verhaar HJ, Aleman A, Vanhees L. Physical  
15 activity and enhanced fitness to improve cognitive function in older people  
16 without known cognitive impairment. *Cochrane Database Syst Rev* 2008; (3):  
17 Cd005381.  
18  
19
- 20  
21 28. Gomez-Pinilla F, Hillman C. The influence of exercise on cognitive abilities.  
22 *Compr Physiol* 2013; **3**(1): 403-28.  
23  
24
- 25  
26 29. Smith PJ, Blumenthal JA, Hoffman BM, et al. Aerobic exercise and  
27 neurocognitive performance: a meta-analytic review of randomized controlled  
28 trials. *Psychosom Med* 2010; **72**(3): 239-52.  
29  
30
- 31  
32 30. Tabbarah M, Crimmins EM, Seeman TE. The Relationship Between Cognitive  
33 and Physical Performance: MacArthur Studies of Successful Aging. *The  
34 Journals of Gerontology: Series A* 2002; **57**(4): M228-M35.  
35  
36
- 37  
38 31. Montero-Odasso M, Speechley M. Falls in Cognitively Impaired Older Adults:  
39 Implications for Risk Assessment And Prevention. *J Am Geriatr Soc* 2018; **66**(2):  
40 367-75.  
41  
42
- 43  
44 32. Muir SW, Gopaul K, Montero Odasso MM. The role of cognitive impairment in  
45 fall risk among older adults: a systematic review and meta-analysis. *Age and  
46 Ageing* 2012; **41**(3): 299-308.  
47  
48
- 49  
50 33. Welmer A-K, Rizzuto D, Laukka EJ, Johnell K, Fratiglioni L. Cognitive and  
51 Physical Function in Relation to the Risk of Injurious Falls in Older Adults: A  
52  
53  
54  
55  
56  
57  
58  
59  
60

- 1  
2  
3 Population-Based Study. *The Journals of Gerontology: Series A* 2017; **72**(5):  
4 669-75.  
5  
6  
7  
8 34. Sanders LMJ, Hortobágyi T, Karssemeijer EGA, Van der Zee EA, Scherder EJA,  
9 van Heuvelen MJG. Effects of low- and high-intensity physical exercise on  
10 physical and cognitive function in older persons with dementia: a randomized  
11 controlled trial. *Alzheimers Res Ther* 2020; **12**(1): 28.  
12  
13  
14  
15  
16  
17 35. Jiménez-García JD, Hita-Contreras F, de la Torre-Cruz M, et al. Risk of Falls in  
18 Healthy Older Adults: Benefits of High-Intensity Interval Training Using Lower  
19 Body Suspension Exercises. *J Aging Phys Act* 2019; **27**(3): 325-33.  
20  
21  
22  
23  
24 36. Edholm P, Nilsson A, Kadi F. Physical function in older adults: Impacts of past  
25 and present physical activity behaviors. *Scand J Med Sci Sports* 2019; **29**(3):  
26 415-21.  
27  
28  
29  
30  
31 37. Glass TA, de Leon CM, Marottoli RA, Berkman LF. Population based study of  
32 social and productive activities as predictors of survival among elderly  
33 Americans. *Bmj* 1999; **319**(7208): 478-83.  
34  
35  
36  
37  
38 38. Rodriguez-Stanley J, Alonso-Ferres M, Zilioli S, Slatcher RB. Housework, health,  
39 and well-being in older adults: The role of socioeconomic status. *J Fam Psychol*  
40 2020; **34**(5): 610-20.  
41  
42  
43  
44  
45  
46  
47  
48  
49  
50  
51  
52  
53  
54  
55  
56  
57  
58  
59  
60

## Table and Figure Captions

**Table 1.** Mean (SD) Participant characteristics for high and low heavy housework and light housework groups, within younger and older groups.

|                                  | Heavy Housework (HH) |             |                  | Light Housework (LH) |             |                  |
|----------------------------------|----------------------|-------------|------------------|----------------------|-------------|------------------|
|                                  | Low                  | High        | <i>p</i> value   | Low                  | High        | <i>p</i> value   |
| <b>Younger</b>                   |                      |             |                  |                      |             |                  |
| <i>n</i>                         | 100                  | 149         |                  | 137                  | 112         |                  |
| Sex, Female (n (%))              | 48 (48)              | 94 (63)     |                  | 62 (45)              | 80 (71)     |                  |
| Age (years)                      | 43 (15)              | 44 (13)     | 0.516            | 42 (14)              | 46 (13)     | <b>0.015</b>     |
| Education (Years)                | 12 (4)               | 12 (4)      | 0.493            | 13 (4)               | 11 (4)      | <b>&lt;0.001</b> |
| Height (m)                       | 1.64 (0.09)          | 1.62 (0.08) | 0.115            | 1.65 (0.08)          | 1.60 (0.08) | <b>&lt;0.001</b> |
| Weight (kg)                      | 68.0 (15.2)          | 67.7 (17.3) | 0.875            | 69.0 (17.2)          | 66.4 (15.5) | 0.219            |
| Body Mass Index                  | 25.2 (4.8)           | 25.6 (5.6)  | 0.557            | 25.1 (5.4)           | 25.8 (5.2)  | 0.324            |
| Physical Activity (MET min/week) |                      |             |                  |                      |             |                  |
| <i>Recreational</i>              | 576 (784)            | 774 (1302)  | 0.137            | 637 (933)            | 764 (1324)  | 0.393            |
| <i>Transport</i>                 | 2065 (3010)          | 2003 (2228) | 0.861            | 1577 (1955)          | 2579 (3075) | <b>0.003</b>     |
| <i>Occupational</i>              | 1686 (3619)          | 2408 (5658) | 0.220            | 2052 (4252)          | 2199 (5699) | 0.821            |
| <i>Total</i>                     | 4327 (5151)          | 5185 (6903) | 0.263            | 4266 (4971)          | 5543 (7511) | 0.125            |
| Housework                        |                      |             |                  |                      |             |                  |
| <i>Heavy (min/week)</i>          | 0 (2)                | 192 (292)   | <b>&lt;0.001</b> | 47 (81)              | 198 (335)   | <b>&lt;0.001</b> |
| <i>Light (min/week)</i>          | 198 (363)            | 584 (593)   | <b>&lt;0.001</b> | 95 (87)              | 838 (592)   | <b>&lt;0.001</b> |
| <i>Total (MET min/week)</i>      | 496 (908)            | 2228 (2079) | <b>&lt;0.001</b> | 425 (458)            | 2887 (2120) | <b>&lt;0.001</b> |
| <b>Older</b>                     |                      |             |                  |                      |             |                  |
| <i>n</i>                         | 132                  | 108         |                  | 103                  | 137         |                  |
| Sex, Female (n (%))              | 63 (48)              | 74 (69)     |                  | 39 (38)              | 98 (72)     |                  |
| Age (Years)                      | 77 (6)               | 73 (6)      | <b>&lt;0.001</b> | 77 (7)               | 74 (6)      | <b>0.004</b>     |
| Education (Years)                | 6 (4)                | 7 (5)       | 0.168            | 7 (5)                | 7 (5)       | 0.764            |
| Height (m)                       | 1.57 (0.09)          | 1.57 (0.08) | 0.987            | 1.58 (0.08)          | 1.56 (0.08) | 0.064            |
| Weight (kg)                      | 60.1 (10.3)          | 58.5 (9.6)  | 0.192            | 60.4 (9.8)           | 58.6 (10.1) | 0.161            |
| Body Mass Index                  | 24.5 (3.7)           | 23.8 (3.3)  | 0.102            | 24.2 (3.5)           | 24.1 (3.5)  | 0.778            |
| Physical Activity (MET min/week) |                      |             |                  |                      |             |                  |
| <i>Recreational</i>              | 828 (1053)           | 890 (1047)  | 0.650            | 867 (1181)           | 847 (941)   | 0.884            |
| <i>Transport</i>                 | 1561 (1565)          | 1836 (2050) | 0.253            | 1554 (1964)          | 1783 (1667) | 0.340            |
| <i>Occupational</i>              | 676 (2269)           | 401 (1397)  | 0.251            | 547 (2113)           | 557 (1783)  | 0.968            |
| <i>Total</i>                     | 3065 (2731)          | 3127 (2531) | 0.856            | 2968 (2968)          | 3187 (2366) | 0.537            |
| Housework                        |                      |             |                  |                      |             |                  |

|    |                   |             |             |                  |           |             |                  |
|----|-------------------|-------------|-------------|------------------|-----------|-------------|------------------|
| 1  |                   |             |             |                  |           |             |                  |
| 2  |                   |             |             |                  |           |             |                  |
| 3  |                   |             |             |                  |           |             |                  |
| 4  | <i>Heavy</i>      | 0 (0)       | 131 (140)   | <b>&lt;0.001</b> | 31 (72)   | 80 (134)    | <b>&lt;0.001</b> |
| 5  | <i>(min/week)</i> |             |             |                  |           |             |                  |
| 6  | <i>Light</i>      | 446 (508)   | 684 (568)   | <b>&lt;0.001</b> | 89 (93)   | 902 (485)   | <b>&lt;0.001</b> |
| 7  | <i>(min/week)</i> |             |             |                  |           |             |                  |
| 8  | <i>Total (MET</i> |             |             |                  |           |             |                  |
| 9  | <i>min/week)</i>  | 1116 (1270) | 2236 (1584) | <b>&lt;0.001</b> | 347 (377) | 2576 (1349) | <b>&lt;0.001</b> |
| 10 |                   |             |             |                  |           |             |                  |
| 11 |                   |             |             |                  |           |             |                  |
| 12 |                   |             |             |                  |           |             |                  |
| 13 |                   |             |             |                  |           |             |                  |
| 14 |                   |             |             |                  |           |             |                  |
| 15 |                   |             |             |                  |           |             |                  |
| 16 |                   |             |             |                  |           |             |                  |
| 17 |                   |             |             |                  |           |             |                  |
| 18 |                   |             |             |                  |           |             |                  |
| 19 |                   |             |             |                  |           |             |                  |
| 20 |                   |             |             |                  |           |             |                  |
| 21 |                   |             |             |                  |           |             |                  |
| 22 |                   |             |             |                  |           |             |                  |
| 23 |                   |             |             |                  |           |             |                  |
| 24 |                   |             |             |                  |           |             |                  |
| 25 |                   |             |             |                  |           |             |                  |
| 26 |                   |             |             |                  |           |             |                  |
| 27 |                   |             |             |                  |           |             |                  |
| 28 |                   |             |             |                  |           |             |                  |
| 29 |                   |             |             |                  |           |             |                  |
| 30 |                   |             |             |                  |           |             |                  |
| 31 |                   |             |             |                  |           |             |                  |
| 32 |                   |             |             |                  |           |             |                  |
| 33 |                   |             |             |                  |           |             |                  |
| 34 |                   |             |             |                  |           |             |                  |
| 35 |                   |             |             |                  |           |             |                  |
| 36 |                   |             |             |                  |           |             |                  |
| 37 |                   |             |             |                  |           |             |                  |
| 38 |                   |             |             |                  |           |             |                  |
| 39 |                   |             |             |                  |           |             |                  |
| 40 |                   |             |             |                  |           |             |                  |
| 41 |                   |             |             |                  |           |             |                  |
| 42 |                   |             |             |                  |           |             |                  |
| 43 |                   |             |             |                  |           |             |                  |
| 44 |                   |             |             |                  |           |             |                  |
| 45 |                   |             |             |                  |           |             |                  |
| 46 |                   |             |             |                  |           |             |                  |
| 47 |                   |             |             |                  |           |             |                  |
| 48 |                   |             |             |                  |           |             |                  |
| 49 |                   |             |             |                  |           |             |                  |
| 50 |                   |             |             |                  |           |             |                  |
| 51 |                   |             |             |                  |           |             |                  |
| 52 |                   |             |             |                  |           |             |                  |
| 53 |                   |             |             |                  |           |             |                  |
| 54 |                   |             |             |                  |           |             |                  |
| 55 |                   |             |             |                  |           |             |                  |
| 56 |                   |             |             |                  |           |             |                  |
| 57 |                   |             |             |                  |           |             |                  |
| 58 |                   |             |             |                  |           |             |                  |
| 59 |                   |             |             |                  |           |             |                  |
| 60 |                   |             |             |                  |           |             |                  |

For peer review only

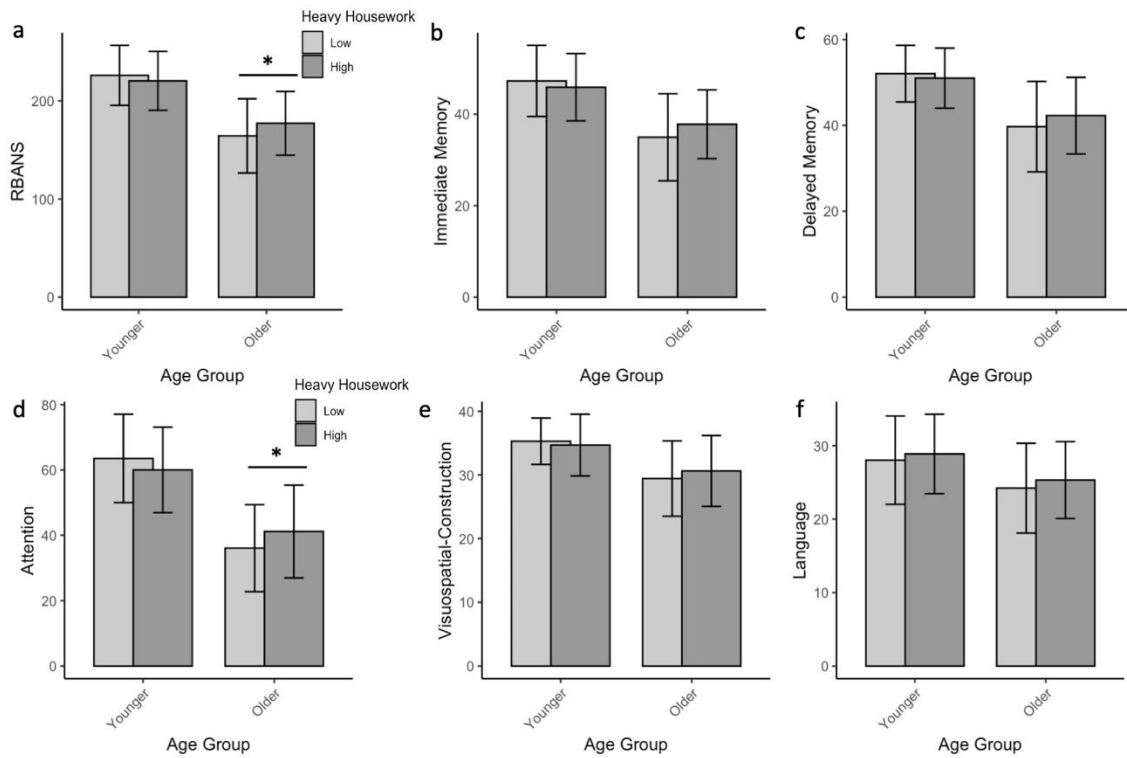

**Figure 1.** Mean (SD) of global cognitive function and specific domains between high and low heavy housework groups, within younger and older adults. \* $p < 0.05$ , adjusted for age, sex and time spent on light housework per week.

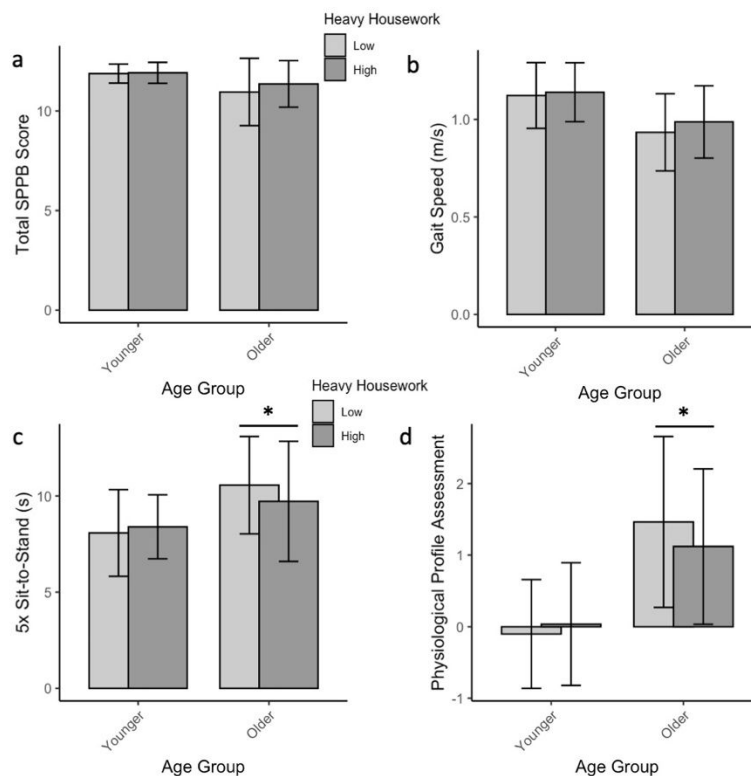

**Figure 2.** Mean (SD) of physical and sensorimotor function measures including total short physical performance battery score (a), 6m habitual gait speed (b), and five-times repeated chair sit-to-stand time (c), and physiological profile assessment (d), between high and low heavy housework groups, within younger and older adults.

\* $p < 0.05$ , adjusted for age, sex and time spent on light housework per week.

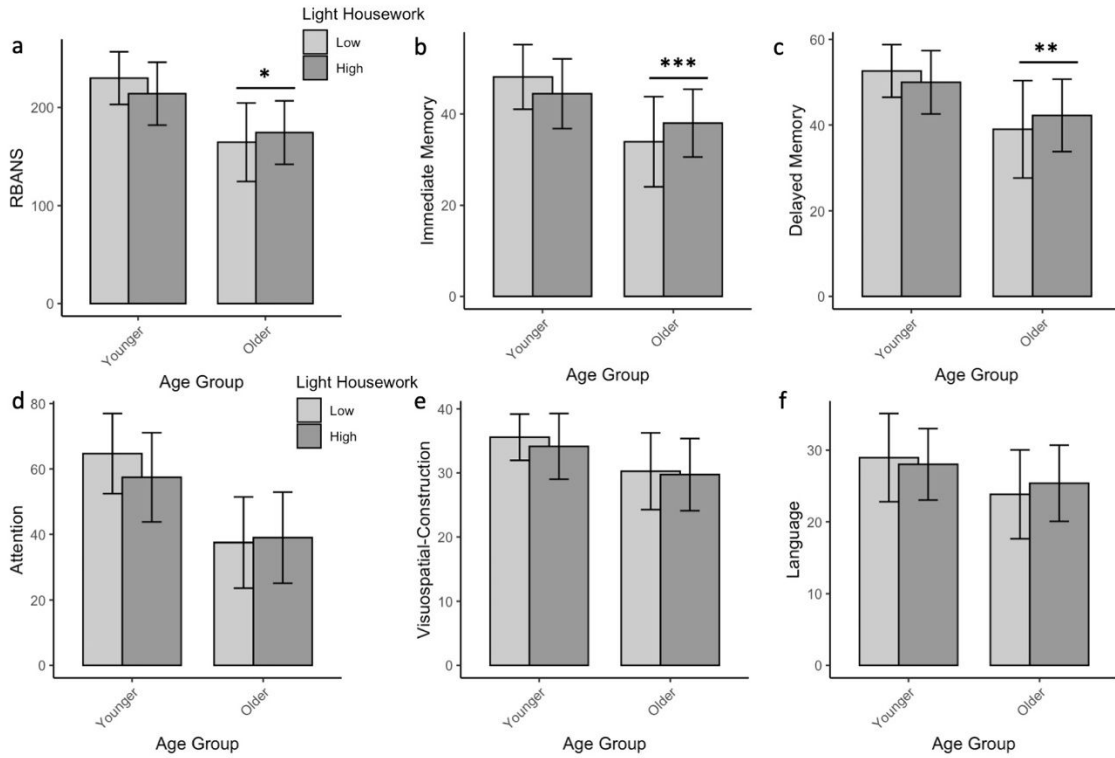

**Figure 3.** Mean (SD) of global cognitive function and specific domains between high and low light housework groups, within younger and older adults. \* $p < 0.05$ , \*\* $p < 0.01$ , \*\*\* $p < 0.001$ , adjusted for age, sex, height, years of education, transport-related physical activity and time spent on heavy housework per week.



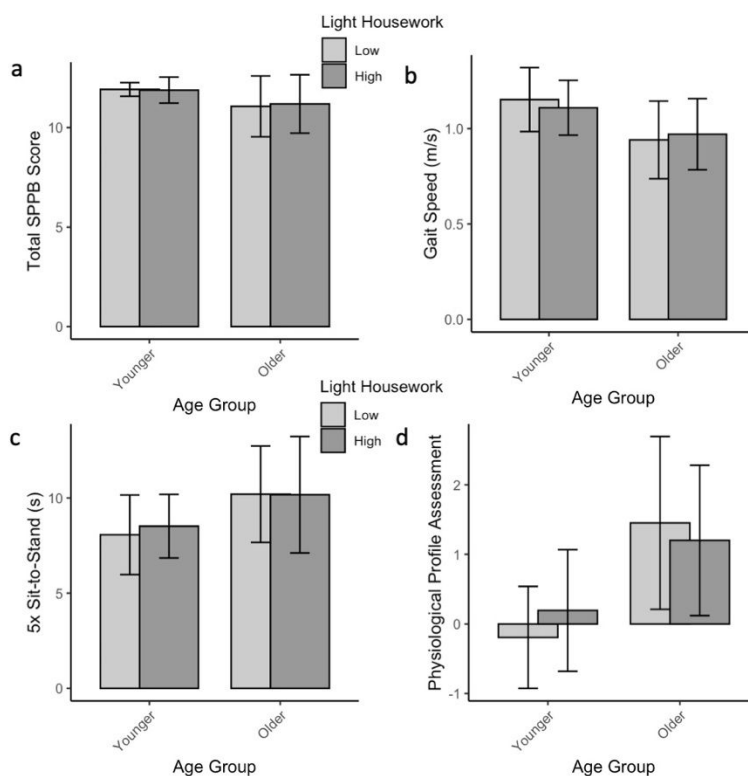

**Figure 4.** Mean (SD) of physical and sensorimotor function measures including total short physical performance battery score (a), 6m habitual gait speed (b), and five-times repeated chair sit-to-stand time (c), and physiological profile assessment (d), between high and low light housework groups, within younger and older adults. All  $p > 0.05$ , adjusted for age, sex, height, years of education, transport-related physical activity and time spent on heavy housework per week.

# Reporting checklist for cross sectional study.

Based on the STROBE cross sectional guidelines.

## Instructions to authors

Complete this checklist by entering the page numbers from your manuscript where readers will find each of the items listed below.

Your article may not currently address all the items on the checklist. Please modify your text to include the missing information. If you are certain that an item does not apply, please write "n/a" and provide a short explanation.

Upload your completed checklist as an extra file when you submit to a journal.

In your methods section, say that you used the STROBE cross sectional reporting guidelines, and cite them as:

von Elm E, Altman DG, Egger M, Pocock SJ, Gøtzsche PC, Vandenbroucke JP. The Strengthening the Reporting of Observational Studies in Epidemiology (STROBE) Statement: guidelines for reporting observational studies.

|                           | Reporting Item                                                                                                      | Page Number |
|---------------------------|---------------------------------------------------------------------------------------------------------------------|-------------|
| <b>Title and abstract</b> |                                                                                                                     |             |
| Title                     | <a href="#">#1a</a> Indicate the study's design with a commonly used term in the title or the abstract              | 1           |
| Abstract                  | <a href="#">#1b</a> Provide in the abstract an informative and balanced summary of what was done and what was found | 2           |
| <b>Introduction</b>       |                                                                                                                     |             |
| Background / rationale    | <a href="#">#2</a> Explain the scientific background and rationale for the investigation being reported             | 5           |
| Objectives                | <a href="#">#3</a> State specific objectives, including any prespecified hypotheses                                 | 6           |
| <b>Methods</b>            |                                                                                                                     |             |
| Study design              | <a href="#">#4</a> Present key elements of study design early in the paper                                          | 7           |
| Setting                   | <a href="#">#5</a> Describe the setting, locations, and relevant dates, including periods of                        | 6           |

|    |                      |                                                                                                              |       |
|----|----------------------|--------------------------------------------------------------------------------------------------------------|-------|
|    |                      | recruitment, exposure, follow-up, and data collection                                                        |       |
| 1  |                      |                                                                                                              |       |
| 2  |                      |                                                                                                              |       |
| 3  | Eligibility criteria | <a href="#">#6a</a> Give the eligibility criteria, and the sources and methods of selection of participants. | 7     |
| 4  |                      |                                                                                                              |       |
| 5  |                      |                                                                                                              |       |
| 6  |                      | <a href="#">#7</a> Clearly define all outcomes, exposures, predictors, potential                             | 7-9   |
| 7  |                      | confounders, and effect modifiers. Give diagnostic criteria, if applicable                                   |       |
| 8  |                      |                                                                                                              |       |
| 9  |                      |                                                                                                              |       |
| 10 | Data sources /       | <a href="#">#8</a> For each variable of interest give sources of data and details of methods                 | 7-9   |
| 11 | measurement          | of assessment (measurement). Describe comparability of assessment                                            |       |
| 12 |                      | methods if there is more than one group. Give information separately                                         |       |
| 13 |                      | for for exposed and unexposed groups if applicable.                                                          |       |
| 14 |                      |                                                                                                              |       |
| 15 |                      |                                                                                                              |       |
| 16 |                      |                                                                                                              |       |
| 17 | Bias                 | <a href="#">#9</a> Describe any efforts to address potential sources of bias                                 | NA    |
| 18 |                      |                                                                                                              |       |
| 19 | Study size           | <a href="#">#10</a> Explain how the study size was arrived at                                                | 10    |
| 20 |                      |                                                                                                              |       |
| 21 | Quantitative         | <a href="#">#11</a> Explain how quantitative variables were handled in the analyses. If                      | 10    |
| 22 | variables            | applicable, describe which groupings were chosen, and why                                                    |       |
| 23 |                      |                                                                                                              |       |
| 24 |                      |                                                                                                              |       |
| 25 | Statistical          | <a href="#">#12a</a> Describe all statistical methods, including those used to control for                   | 10-11 |
| 26 | methods              | confounding                                                                                                  |       |
| 27 |                      |                                                                                                              |       |
| 28 |                      |                                                                                                              |       |
| 29 | Statistical          | <a href="#">#12b</a> Describe any methods used to examine subgroups and interactions                         | 10    |
| 30 | methods              |                                                                                                              |       |
| 31 |                      |                                                                                                              |       |
| 32 |                      |                                                                                                              |       |
| 33 | Statistical          | <a href="#">#12c</a> Explain how missing data were addressed                                                 | NA    |
| 34 | methods              |                                                                                                              |       |
| 35 |                      |                                                                                                              |       |
| 36 |                      |                                                                                                              |       |
| 37 | Statistical          | <a href="#">#12d</a> If applicable, describe analytical methods taking account of sampling                   | NA    |
| 38 | methods              | strategy                                                                                                     |       |
| 39 |                      |                                                                                                              |       |
| 40 |                      |                                                                                                              |       |
| 41 | Statistical          | <a href="#">#12e</a> Describe any sensitivity analyses                                                       | NA    |
| 42 | methods              |                                                                                                              |       |
| 43 |                      |                                                                                                              |       |
| 44 | <b>Results</b>       |                                                                                                              |       |
| 45 |                      |                                                                                                              |       |
| 46 | Participants         | <a href="#">#13a</a> Report numbers of individuals at each stage of study—eg numbers                         | 10    |
| 47 |                      | potentially eligible, examined for eligibility, confirmed eligible,                                          |       |
| 48 |                      | included in the study, completing follow-up, and analysed. Give                                              |       |
| 49 |                      | information separately for for exposed and unexposed groups if                                               |       |
| 50 |                      | applicable.                                                                                                  |       |
| 51 |                      |                                                                                                              |       |
| 52 |                      |                                                                                                              |       |
| 53 |                      |                                                                                                              |       |
| 54 |                      |                                                                                                              |       |
| 55 | Participants         | <a href="#">#13b</a> Give reasons for non-participation at each stage                                        | NA    |
| 56 |                      |                                                                                                              |       |
| 57 | Participants         | <a href="#">#13c</a> Consider use of a flow diagram                                                          | NA    |
| 58 |                      |                                                                                                              |       |
| 59 |                      |                                                                                                              |       |
| 60 |                      |                                                                                                              |       |

|    |                    |                      |                                                                                                                                                                                                                   |       |
|----|--------------------|----------------------|-------------------------------------------------------------------------------------------------------------------------------------------------------------------------------------------------------------------|-------|
| 1  | Descriptive data   | <a href="#">#14a</a> | Give characteristics of study participants (eg demographic, clinical, social) and information on exposures and potential confounders. Give information separately for exposed and unexposed groups if applicable. | 10-11 |
| 2  |                    |                      |                                                                                                                                                                                                                   |       |
| 3  |                    |                      |                                                                                                                                                                                                                   |       |
| 4  |                    |                      |                                                                                                                                                                                                                   |       |
| 5  |                    |                      |                                                                                                                                                                                                                   |       |
| 6  | Descriptive data   | <a href="#">#14b</a> | Indicate number of participants with missing data for each variable of interest                                                                                                                                   | NA    |
| 7  |                    |                      |                                                                                                                                                                                                                   |       |
| 8  |                    |                      |                                                                                                                                                                                                                   |       |
| 9  |                    |                      |                                                                                                                                                                                                                   |       |
| 10 | Outcome data       | <a href="#">#15</a>  | Report numbers of outcome events or summary measures. Give information separately for exposed and unexposed groups if applicable.                                                                                 | 12-13 |
| 11 |                    |                      |                                                                                                                                                                                                                   |       |
| 12 |                    |                      |                                                                                                                                                                                                                   |       |
| 13 |                    |                      |                                                                                                                                                                                                                   |       |
| 14 | Main results       | <a href="#">#16a</a> | Give unadjusted estimates and, if applicable, confounder-adjusted estimates and their precision (eg, 95% confidence interval). Make clear which confounders were adjusted for and why they were included          | 12-13 |
| 15 |                    |                      |                                                                                                                                                                                                                   |       |
| 16 |                    |                      |                                                                                                                                                                                                                   |       |
| 17 |                    |                      |                                                                                                                                                                                                                   |       |
| 18 |                    |                      |                                                                                                                                                                                                                   |       |
| 19 | Main results       | <a href="#">#16b</a> | Report category boundaries when continuous variables were categorized                                                                                                                                             | NA    |
| 20 |                    |                      |                                                                                                                                                                                                                   |       |
| 21 | Main results       | <a href="#">#16c</a> | If relevant, consider translating estimates of relative risk into absolute risk for a meaningful time period                                                                                                      | NA    |
| 22 |                    |                      |                                                                                                                                                                                                                   |       |
| 23 |                    |                      |                                                                                                                                                                                                                   |       |
| 24 |                    |                      |                                                                                                                                                                                                                   |       |
| 25 | Other analyses     | <a href="#">#17</a>  | Report other analyses done—e.g., analyses of subgroups and interactions, and sensitivity analyses                                                                                                                 | NA    |
| 26 |                    |                      |                                                                                                                                                                                                                   |       |
| 27 |                    |                      |                                                                                                                                                                                                                   |       |
| 28 |                    |                      |                                                                                                                                                                                                                   |       |
| 29 | <b>Discussion</b>  |                      |                                                                                                                                                                                                                   |       |
| 30 |                    |                      |                                                                                                                                                                                                                   |       |
| 31 | Key results        | <a href="#">#18</a>  | Summarise key results with reference to study objectives                                                                                                                                                          | 13    |
| 32 |                    |                      |                                                                                                                                                                                                                   |       |
| 33 |                    |                      |                                                                                                                                                                                                                   |       |
| 34 | Limitations        | <a href="#">#19</a>  | Discuss limitations of the study, taking into account sources of potential bias or imprecision. Discuss both direction and magnitude of any potential bias.                                                       | 17    |
| 35 |                    |                      |                                                                                                                                                                                                                   |       |
| 36 |                    |                      |                                                                                                                                                                                                                   |       |
| 37 |                    |                      |                                                                                                                                                                                                                   |       |
| 38 |                    |                      |                                                                                                                                                                                                                   |       |
| 39 | Interpretation     | <a href="#">#20</a>  | Give a cautious overall interpretation considering objectives, limitations, multiplicity of analyses, results from similar studies, and other relevant evidence.                                                  | 14-16 |
| 40 |                    |                      |                                                                                                                                                                                                                   |       |
| 41 |                    |                      |                                                                                                                                                                                                                   |       |
| 42 |                    |                      |                                                                                                                                                                                                                   |       |
| 43 |                    |                      |                                                                                                                                                                                                                   |       |
| 44 | Generalisability   | <a href="#">#21</a>  | Discuss the generalisability (external validity) of the study results                                                                                                                                             | 17    |
| 45 |                    |                      |                                                                                                                                                                                                                   |       |
| 46 |                    |                      |                                                                                                                                                                                                                   |       |
| 47 | <b>Other</b>       |                      |                                                                                                                                                                                                                   |       |
| 48 | <b>Information</b> |                      |                                                                                                                                                                                                                   |       |
| 49 |                    |                      |                                                                                                                                                                                                                   |       |
| 50 |                    |                      |                                                                                                                                                                                                                   |       |
| 51 | Funding            | <a href="#">#22</a>  | Give the source of funding and the role of the funders for the present study and, if applicable, for the original study on which the present article is based                                                     | 18    |
| 52 |                    |                      |                                                                                                                                                                                                                   |       |
| 53 |                    |                      |                                                                                                                                                                                                                   |       |
| 54 |                    |                      |                                                                                                                                                                                                                   |       |
| 55 |                    |                      |                                                                                                                                                                                                                   |       |

The STROBE checklist is distributed under the terms of the Creative Commons Attribution License CC-BY.

This checklist was completed on 05. April 2021 using <https://www.goodreports.org/>, a tool made by the

[EQUATOR Network](#) in collaboration with [Penelope.ai](#)

For peer review only - <http://bmjopen.bmj.com/site/about/guidelines.xhtml>

# BMJ Open

## Cross-sectional associations between housework with cognitive, physical and sensorimotor functions in younger and older community-dwelling adults – the Yishun Study

|                                 |                                                                                                                                                                                                                                                                                                                                                                                                                                                                                                                                                                                                                                                              |
|---------------------------------|--------------------------------------------------------------------------------------------------------------------------------------------------------------------------------------------------------------------------------------------------------------------------------------------------------------------------------------------------------------------------------------------------------------------------------------------------------------------------------------------------------------------------------------------------------------------------------------------------------------------------------------------------------------|
| Journal:                        | <i>BMJ Open</i>                                                                                                                                                                                                                                                                                                                                                                                                                                                                                                                                                                                                                                              |
| Manuscript ID                   | bmjopen-2021-052557.R1                                                                                                                                                                                                                                                                                                                                                                                                                                                                                                                                                                                                                                       |
| Article Type:                   | Original research                                                                                                                                                                                                                                                                                                                                                                                                                                                                                                                                                                                                                                            |
| Date Submitted by the Author:   | 23-Aug-2021                                                                                                                                                                                                                                                                                                                                                                                                                                                                                                                                                                                                                                                  |
| Complete List of Authors:       | Lee, Shuen Yee; Singapore Institute of Technology<br>Pang, Benedict Wei Jun; Geriatric Education and Research Institute Ltd<br>Lau, Lay Khoon; Geriatric Education and Research Institute Ltd<br>Jabbar, Khalid Abdul; Geriatric Education and Research Institute Ltd<br>Seah, Wei Ting; Geriatric Education and Research Institute Ltd<br>Chen, Kenneth Kexun; Geriatric Education and Research Institute Ltd<br>Ng, Tze Pin; National University of Singapore, Department of Psychological Medicine; Geriatric Education and Research Institute Ltd<br>Wee, Shiou-Liang; Singapore Institute of Technology; Geriatric Education and Research Institute Ltd |
| <b>Primary Subject Heading</b>: | Public health                                                                                                                                                                                                                                                                                                                                                                                                                                                                                                                                                                                                                                                |
| Secondary Subject Heading:      | Geriatric medicine, Health policy, Sports and exercise medicine                                                                                                                                                                                                                                                                                                                                                                                                                                                                                                                                                                                              |
| Keywords:                       | Health policy < HEALTH SERVICES ADMINISTRATION & MANAGEMENT, PREVENTIVE MEDICINE, Physiology < NATURAL SCIENCE DISCIPLINES, GERIATRIC MEDICINE, PUBLIC HEALTH, SPORTS MEDICINE                                                                                                                                                                                                                                                                                                                                                                                                                                                                               |
|                                 |                                                                                                                                                                                                                                                                                                                                                                                                                                                                                                                                                                                                                                                              |

SCHOLARONE™  
Manuscripts



I, the Submitting Author has the right to grant and does grant on behalf of all authors of the Work (as defined in the below author licence), an exclusive licence and/or a non-exclusive licence for contributions from authors who are: i) UK Crown employees; ii) where BMJ has agreed a CC-BY licence shall apply, and/or iii) in accordance with the terms applicable for US Federal Government officers or employees acting as part of their official duties; on a worldwide, perpetual, irrevocable, royalty-free basis to BMJ Publishing Group Ltd ("BMJ") its licensees and where the relevant Journal is co-owned by BMJ to the co-owners of the Journal, to publish the Work in this journal and any other BMJ products and to exploit all rights, as set out in our [licence](#).

The Submitting Author accepts and understands that any supply made under these terms is made by BMJ to the Submitting Author unless you are acting as an employee on behalf of your employer or a postgraduate student of an affiliated institution which is paying any applicable article publishing charge ("APC") for Open Access articles. Where the Submitting Author wishes to make the Work available on an Open Access basis (and intends to pay the relevant APC), the terms of reuse of such Open Access shall be governed by a Creative Commons licence – details of these licences and which [Creative Commons](#) licence will apply to this Work are set out in our licence referred to above.

Other than as permitted in any relevant BMJ Author's Self Archiving Policies, I confirm this Work has not been accepted for publication elsewhere, is not being considered for publication elsewhere and does not duplicate material already published. I confirm all authors consent to publication of this Work and authorise the granting of this licence.

1  
2  
3  
4 **Title: Cross-sectional associations between housework with cognitive,**  
5  
6 **physical and sensorimotor functions in younger and older community-**  
7  
8 **dwelling adults – the Yishun Study**  
9  
10

11  
12  
13 Shuen Yee Lee, PhD<sup>a</sup>, Benedict Wei Jun Pang, BSc<sup>b</sup>, Lay Khoon Lau, PhD<sup>b</sup>, Khalid  
14  
15 Abdul Jabbar, MSc<sup>b</sup>, Wei Ting Seah, MSc<sup>b</sup>, Kenneth Kexun Chen, BSc<sup>b</sup>, Tze Pin Ng,  
16  
17 MD<sup>b,c</sup>, Shiou-Liang Wee, PhD<sup>a,b</sup>  
18  
19

20  
21  
22 <sup>a</sup>Faculty of Health and Social Sciences, Singapore Institute of Technology, 10 Dover  
23  
24 Drive, Singapore 138683, Singapore, Singapore  
25  
26

27 <sup>b</sup>Geriatric Education and Research Institute, 2 Yishun Central 2, Singapore 768024,  
28  
29 Singapore, Singapore  
30  
31

32 <sup>c</sup>Department of Psychological Medicine, National University of Singapore, 21 Lower  
33  
34 Kent Ridge Rd, Singapore 119077, Singapore, Singapore  
35  
36

37  
38  
39 **Corresponding author:** Shiou-Liang Wee, Geriatric Education and Research  
40  
41 Institute (GERI), 2 Yishun Central 2, Tower E Level 4 GERI Admin, 768024,  
42  
43 Singapore. Phone: +65 65924606, Email: [weeshiouliang@gmail.com](mailto:weeshiouliang@gmail.com)  
44  
45  
46  
47  
48  
49  
50  
51  
52  
53  
54  
55  
56  
57  
58  
59  
60

## Abstract

**Objectives:** Regular moderate-to-vigorous intensity recreational physical activity (PA) improves physical and cognitive functions. However, the age-associated relationships between non-recreational PA with functional ability remain less explored. We examined the associations between housework and functional health among younger and older Singaporean community-dwelling adults.

**Design:** Cross-sectional study

**Setting and Participants:** Younger (<65yrs,  $n=249$ ) and older ( $\geq 65$ yrs,  $n=240$ ) community-dwelling adults were randomly recruited from a large residential town in Singapore.

**Outcome measures:** Physical function was assessed using Short Physical Performance Battery, repeated-chair-sit-to-stand and gait speed. Cognitive and sensorimotor functions were assessed using Repeatable Battery for the Assessment of Neuropsychological Status (RBANS) and Physiological Profile Assessment (PPA) respectively.

**Methods:** Light (LH) and heavy housework (HH), recreational, occupational, and transport-related PA were assessed using PA questionnaires. Participants were dichotomised into low- and high-volume LH and HH groups. Results were adjusted for level of recreational and other non-recreational PA.

**Results:** Among older but not younger adults, RBANS scores were 8% and 5% higher in high HH and LH groups compared with low HH and LH groups respectively ( $p=0.012$  and  $p=0.016$ ). Specifically, HH was associated with 14% higher attention score ( $p=0.014$ ), and LH with 12% and 8% higher immediate and delayed memory scores respectively ( $p<0.001$  and  $p=0.004$ ). In older adults, sit-to-stand-time and PPA scores were 8% and 23% lower in high HH than low HH group respectively



1  
2  
3 (p=0.011 and p=0.040). SPPB and gait speed did not differ with age or HH. LH was  
4  
5 not associated with physical or sensorimotor function.  
6  
7

8 **Conclusions:** Among older adults, housework is associated with higher cognitive  
9  
10 function, specifically in attention and memory. Associations between housework with  
11  
12 physical and sensorimotor performance were intensity-dependent. Housework PA is  
13  
14 positively associated with functional health among community-dwelling older adults,  
15  
16 independent of recreation and other non-recreational physical activities. Further  
17  
18 longitudinal and intervention studies are needed to establish causality.  
19  
20  
21

22 **Key words:** Housework intensity, Functional health, High-income countries, Ageing,  
23  
24 Household chores, Non-recreational physical activity  
25  
26  
27  
28  
29  
30  
31  
32  
33  
34  
35  
36  
37  
38  
39  
40  
41  
42  
43  
44  
45  
46  
47  
48  
49  
50  
51  
52  
53  
54  
55  
56  
57  
58  
59  
60

## Article Summary

### Strengths and limitations of this study

- Representative sample of Singapore's adult population across age groups
- Comprehensive information about housework, recreational, occupational and transport-related physical activities using validated measures
- Analyses included comparison between younger and older age groups and adjustments for potential confounders
- This study is cross-sectional; therefore, associations between housework and functional health do not necessarily reflect causality.
- Housework and physical activities were self-reported and not objectively measured.

## Introduction

Regular physical activity (PA) improves physical and mental health, mitigates the risks and effects of chronic diseases, and reduces falls, immobility, dependency and mortality among older adults<sup>1-3</sup>. Yet, global surveillance data indicate that in 2016, levels of insufficient PA remained high (27·5%) and stable across previous 10 years<sup>4</sup>. The prevalence of insufficient PA was also more than double in high-income countries than low-income countries (36·8% vs 16·2%), and was the highest in Singapore (36·5%), among high-income Asia Pacific countries<sup>4</sup>. In wealthier countries, transition towards more sedentary occupations and motorised transportation could explain the higher levels of inactivity. The majority of PA in high-income countries are from recreational PA, which differed from low-income countries where PA is predominantly from non-recreational activities, including transportation, occupational and housework<sup>4,5</sup>. Given the increasing prevalence of insufficient PA globally<sup>5</sup>, better strategies and policies are required to increase PA levels, especially among older adults, due to their increased vulnerability to adverse health outcomes<sup>6</sup>.

Earlier studies in high-income countries largely focused on the effects of recreational PA on physical and cognitive capacities, which are key risk factors for falls among older adults<sup>7-9</sup>. Few studies have examined the independent effects of non-recreational activity, such as housework tasks, on age-associated decline in functional ability<sup>10-12</sup>. Furthermore, although the effects of exercise intensity have been widely investigated<sup>1</sup>, none of the studies investigated the associations between housework intensity and age-associated functional health. With the rapidly ageing population and increasing life expectancy worldwide, approaches to promote

1  
2  
3 healthy ageing, which centres upon the maintenance of functional ability, are  
4 urgently needed <sup>13</sup>.  
5  
6  
7  
8  
9

10 Housework activities are a large part of everyday activities in older people, and  
11 account for a significant proportion of self-reported PA <sup>14</sup>. Apart from a meaningful  
12 occupation, housework is also a component of instrumental activities of daily living –  
13 both key factors of successful ageing. Additionally, single bout of housework and  
14 chronic housework are associated with improved cognition, brain volume and  
15 executive function, and negatively associated with frailty <sup>10-12</sup>. Regardless of country  
16 income levels, higher levels of non-recreational PA were associated with a graded  
17 reduction in mortality and cardiovascular diseases, suggesting the potential role of  
18 non-recreational PA such as housework, on improving health outcomes even in high-  
19 income countries <sup>5</sup>. Housework may also confer benefits on physical and mental  
20 function among older adults in a high-income country such as Singapore. Therefore,  
21 we studied the associations between light and heavy housework activities, with  
22 cognitive, physical and sensorimotor function, among younger and older adults in  
23 Singapore.  
24  
25  
26  
27  
28  
29  
30  
31  
32  
33  
34  
35  
36  
37  
38  
39  
40  
41  
42  
43  
44  
45  
46  
47

## 48 **Methods**

### 49 Settings

50 Community-dwelling adults ( $\geq 21$  years) were recruited from a large north-eastern  
51 residential town of Yishun in Singapore, with residential population of 220,320  
52 (50.6% females), with 12.2% older adults ( $\geq 65$  years). This is similar to the overall  
53 Singapore residential population of 4,044,200 (51.1% females), with 15.2% older  
54 adults ( $\geq 65$  years) <sup>15</sup>.  
55  
56  
57  
58  
59  
60

## Participants

Participants were recruited cross-sectionally from the Yishun Study through random sampling, in quotas of 20 to 40 participants in each sex and age group (10-year age groups between 21–60 years old and 5-year age groups after 60 years), to obtain a representative sample of ~300 men and ~300 women<sup>16</sup>. Briefly, community-dwelling adults aged 21 years and above who were independent in performing activities of daily living, had <5 comorbidities, and no neuromuscular or cognitive disorders were recruited. Those between 21–64 years and 65–90 years in age were categorized as younger and older participants respectively. Participants self-reported their years of education and medical conditions and comorbidities. All assessments were based on standardized protocols and administered by trained researchers at the Geriatric Education & Research Institute Lab on Yishun Health Campus, mostly within one visit. Ethics approval was obtained from the National Healthcare Group DSRB (2017/00212), in accordance with the relevant guidelines from the Declaration of Helsinki and the ethical principles in the Belmont Report. All participants gave written informed consent.

## Patient and public involvement

Neither patients nor the public were involved in the design, planning, conduct or reporting of this study.

### Anthropometric assessment

Body weight and height were measured using an electronic scale and stadiometer respectively (SECA, Hamburg, Germany). Body mass index was calculated as body weight (kg) divided by height (m) squared.

### Housework, recreational, transport and occupational PA

Data on housework were self-reported and collected according to the Longitudinal Ageing Study Amsterdam PA questionnaire (LAPAQ) <sup>17</sup>, which consists of specific questions regarding frequency and time spent on light and heavy household tasks. Light housework tasks (LH) included washing the dishes, dusting, making the bed, doing the laundry, hanging out the laundry, ironing, tidying up, and cooking meals. Heavy housework tasks (HH) included window cleaning, changing beddings, beating the mat, vacuuming, washing or scrubbing the floor, and chores involving sawing, carpeting, repairing or painting. The median time spent per week on household activities was used to dichotomize participants into high and low groups for LH (315 min/week) and HH (15 min/week) groups. Light housework was assigned a metabolic equivalent of task (MET) of 2·5 and heavy housework was assigned a MET of 4·0 <sup>18</sup>.

Recreational (sport, fitness or leisure time activities), transport (active commuting/travel) and occupational (work) PA were determined using the Global Physical Activity Questionnaire (GPAQ), which consists of questions assessing the frequency and duration of vigorous- or moderate-intensity activities during a typical week <sup>19</sup>. A cut-off of  $\geq 600$  MET min/week ( $\geq 150$  min/week of moderate-intensity PA

1  
2  
3 or  $\geq 75$  min/week of vigorous-intensity PA) was used to determine percentage of  
4  
5 participants who met the current PA guidelines <sup>5,20</sup>.  
6  
7  
8  
9

### 10 Cognitive function

11  
12 Cognitive performance was assessed by the Repeatable Battery for the Assessment  
13 of Neuropsychological Status (RBANS) score. RBANS is a standardized age-  
14 adjusted battery that is sensitive to cognitive impairment <sup>21</sup>. RBANS assesses global  
15 and specific cognitive domains including immediate and delayed memory,  
16  
17 visuospatial-construction, language, and attention.  
18  
19  
20  
21  
22  
23  
24  
25  
26

### 27 Physical function

28  
29 Habitual gait speed was assessed using a 6m GAITRite Walkway (CIR Systems Inc,  
30 Sparta, NJ) with 2m lead in and out phase. Participants performed three trials and  
31 the average timing was recorded. The Short Physical Performance Battery (SPPB)  
32 consists of 3 subtests including balance, gait and sit-to-stand <sup>22,23</sup>. The balance  
33 subtest composed of 3 parts with progressive difficulty, including unaided feet-  
34 together stand, semi-tandem stand and full-tandem stand. Participants were timed  
35 until they moved or 10s elapsed time. Gait speed was assessed by participants  
36 walking 8ft at their usual pace, with a moving start <sup>22</sup>. The average timing was  
37 recorded over two trials. To assess sit-to-stand time, participants folded their arms  
38 across their chest and performed five chair stands as quickly as possible. Each of  
39 the 3 subtests was scored from 0–4 and the total score was the sum of 3 subtests,  
40 ranging from 0–12. Higher SPPB scores indicated better physical function <sup>22</sup>.  
41  
42  
43  
44  
45  
46  
47  
48  
49  
50  
51  
52  
53  
54  
55  
56  
57  
58  
59  
60

### Sensorimotor or Physiological falls risk assessments

Physiological falls risk was determined using the physiological profile assessment (PPA) short version, which has been shown to predict fall incidents and consists of five validated sensorimotor measures: visual contrast sensitivity, hand reaction time, knee extension strength, proprioception and postural sway<sup>24,25</sup>. The five measures were weighted to compute a composite PPA index score using the NeuRA FallScreen® Falls Risk Calculator (<https://fbirc.neura.edu.au/fallscreen>). Higher PPA scores indicates poorer sensorimotor performance and greater falls risk<sup>24,25</sup>.

### Statistical analysis

All statistical analyses were performed using R version 3.6.2 (R Foundation for statistical computing, Vienna, Austria). A sample size of 400 (100 per group) was needed for the trial to have 80% power to detect a two-sided hypothesis test at an  $\alpha$  level of 0.05 (effect size of 0.2) (G\*Power, version 3.1, Germany). All participants with completed outcome measures were included for analysis. Numerical variables are presented as mean (standard deviation, SD) in text and figures unless otherwise stated. Participant characteristics were analyzed using independent samples t-test to assess potential differences between high and low HH and LH groups.

Sensorimotor, cognitive and physical function measures were analyzed using two-way analysis of variance (ANOVA) for HH and LH independently, with age group (younger vs older), housework groups (low vs high), and their interaction (age\*housework) as fixed effects. Normality and homogeneity of variances assumptions were tested using Shapiro-Wilk and Levene's test respectively. Effect sizes are reported with partial eta squared ( $\eta^2_p$ )<sup>26</sup>. A value of  $p < 0.05$  was considered statistically significant.



## Results

### Participant characteristics

A total of 249 participants (57% women) with mean age of 44 years (SD 14 years) in the younger group, and 240 participants (57.1% women) with mean age of 75 years (SD 6 years) in the older group were included in the analysis. Ethnic distribution of participants (82.0% Chinese, 8.4% Malay, 6.7% Indians, and 2.9% from other ethnicities) was similar to that of Singapore's population<sup>15</sup>. A total of 36% ( $n=90$ ) and 48% ( $n=116$ ) of the participants in the younger and older group respectively, met the recommended PA level derived exclusively from recreational PA<sup>20</sup>. These values were lower than 61% ( $n=152$ ) and 66% ( $n=159$ ) of the younger and older participants respectively, who attained the recommended PA level exclusively through housework activities.

Participant demographics between high and low HH and LH groups, such as age, education, anthropometric, PA and housework data, are summarised in Table 1. Compared with low HH and LH groups, majority of participants in high HH and LH groups were women, regardless of age groups. Within the younger group, high LH group were shorter and had less years of education than low LH group (all  $p<0.001$ , Table 1). Total, recreational and occupational PA did not differ between high and low HH and LH groups in younger and older adults (all  $p>0.05$ , Table 1). Within the younger but not the older group, transport-related PA was 39% lower in low LH than high LH group ( $p=0.003$ , Table 1). Regardless of age group, compared with low HH and LH groups, participants in the high HH and LH groups spent more time on both

1  
2  
3 light and heavy housework activities per week and had higher total housework MET  
4 min/week (all  $p < 0.001$ , Table 1).  
5  
6  
7  
8  
9

10 For subsequent light housework analyses, age, sex, height, education, transport PA  
11 and heavy housework were included in the model to adjust for confounding  
12 variables. To adjust for confounding factors, age, sex and light housework were  
13 included in model for subsequent heavy housework analyses. Adjusting for  
14 recreational and occupational PA in the analyses did not affect any of the results  
15 presented; hence, data are presented with recreational and occupational PA  
16 excluded from the model.  
17  
18  
19  
20  
21  
22  
23  
24  
25  
26  
27

#### 28 Association of heavy housework activities with cognitive function

29  
30 Within the older group, RBANS global cognition score was 8% higher in the high HH  
31 than low HH group ( $p = 0.012$ ) but did not differ between high and low HH groups  
32 among the younger individuals ( $p = 0.630$ ) (age\*housework;  $p = 0.031$ ,  $\eta^2_p = 0.01$ , Fig  
33 1a). Immediate memory index scores between high and low HH groups were not  
34 statistically significant among older ( $p = 0.055$ ) and younger adults ( $p = 0.332$ ), despite  
35 significant interaction effects (age\*housework;  $p = 0.038$ ,  $\eta^2_p = 0.009$ , Fig 1b). No  
36 significant interaction effects between age and HH groups were observed for  
37 delayed memory ( $p = 0.108$ ,  $\eta^2_p = 0.005$ ), visuospatial-construction ( $p = 0.183$ ,  
38  $\eta^2_p = 0.004$ ), and language index scores ( $p = 0.776$ ,  $\eta^2_p = 0.0002$ ) (Fig 1c-e). Attention  
39 index score was 14% higher in the high HH than low HH group within the older  
40 ( $p = 0.014$ ) but not the younger ( $p = 0.304$ ) group (age\*housework;  $p = 0.012$ ,  $\eta^2_p = 0.01$ ,  
41 Fig 1f).  
42  
43  
44  
45  
46  
47  
48  
49  
50  
51  
52  
53  
54  
55  
56  
57  
58  
59  
60

### Association of light housework activities with cognitive function

Compared with low LH group, high LH group had 5% higher RBANS global cognition score among the older but not the younger adults ( $p=0.016$  vs  $p=0.335$ ) (age\*housework;  $p=0.015$ ,  $\eta^2_p=0.01$ , Fig 2a). Within the older but not the younger individuals, immediate and delayed memory index scores were also 12% ( $p<0.001$  vs  $p=0.165$ ) and 8% ( $p=0.004$  vs  $p=0.729$ ) higher in high LH than low LH group respectively (age\*housework;  $p<0.001$ ,  $\eta^2_p=0.03$  and  $p=0.022$ ,  $\eta^2_p=0.01$ )(Fig 2b&c). No significant interaction effects between age and LH groups were observed for visuospatial-construction ( $p=0.781$ ,  $\eta^2_p=0.0002$ ), language ( $p=0.318$ ,  $\eta^2_p=0.002$ ) and attention ( $p=0.194$ ,  $\eta^2_p=0.004$ ) index scores (Fig 2d–f).

### Association of heavy housework activities with physical and sensorimotor function

The interaction effects between age and HH groups were not significant for total SPPB score ( $p=0.155$ ,  $\eta^2_p=0.004$ , Fig 3a) and gait speed ( $p=0.482$ ,  $\eta^2_p=0.001$ , Fig 3b). Within the older but not the younger group, sit-to-stand time was 8% lower in the high HH than low HH group ( $p=0.011$  vs  $p=0.722$ ) (age\*housework;  $p=0.036$ ,  $\eta^2_p=0.009$ , Fig 3c). PPA index score, indicative of sensorimotor function, was 23% lower in the high HH than low HH group, among the older ( $p=0.040$ ) but not the younger adults ( $p=0.477$ ) (age\*housework;  $p=0.046$ ,  $\eta^2_p=0.008$ , Fig 3d).

### Association of light housework activities with physical and sensorimotor function

The interaction effects between age and LH groups were not significant for total SPPB score ( $p=0.709$ ,  $\eta^2_p=0.0003$ ), gait speed ( $p=0.136$ ,  $\eta^2_p=0.005$ ), sit-to-stand ( $p=0.445$ ,  $\eta^2_p=0.001$ ) (Fig 4a–c). PPA index scores, indicative of sensorimotor function, were not significant between high and low LH groups among older

1  
2  
3 ( $p=0.067$ ) and younger adults ( $p=0.178$ ), despite significant interaction effects  
4  
5 ( $\text{age} \times \text{housework}; p=0.021, \eta^2_p=0.01$ , Fig 4d). Mean (SD) values of cognitive, physical  
6  
7 and sensorimotor performance between age and housework groups are presented in  
8  
9 Supplementary Table S1.  
10  
11  
12  
13  
14

## 15 Discussion

16  
17 The present study is the first to report that housework activity is associated with  
18  
19 cognitive, physical and sensorimotor functions among older but not younger adults in  
20  
21 Singapore. These positive associations of housework with functional performance in  
22  
23 older adults were independent of recreational, occupational and transport-related  
24  
25 physical activities. We also show that more adults attained recommended physical  
26  
27 activity levels through housework than recreation.  
28  
29  
30  
31

32  
33  
34 Regardless of intensity, higher levels of housework activities were associated with  
35  
36 higher global cognition, among our population of older adults. Earlier studies  
37  
38 observed that lower levels of housework activities were associated with mild  
39  
40 cognitive impairment, cognitive decline and lower grey matter volume among older  
41  
42 adults<sup>11,27,28</sup>, suggesting a positive association between housework activities and  
43  
44 cognitive function, plausibly through an increase in brain volume, as observed with  
45  
46 exercise interventions in older adults<sup>29,30</sup>. However, the positive associations  
47  
48 between housework and cognition were not apparent in younger adults in our  
49  
50 population. Differences in years of education between younger and older adults likely  
51  
52 explain the disparity, as younger adults in this study had five more years of  
53  
54 education on average than older adults. Since education level is positively  
55  
56 associated with baseline cognitive function and slower cognitive decline<sup>31</sup>, it is  
57  
58  
59  
60

1  
2  
3 plausible that higher education levels and cognitive function in younger adults  
4  
5 decreases the potential for better cognitive function associated with housework  
6  
7  
8 activities.  
9

10  
11  
12 Our results demonstrate, for the first time, that the intensity of housework was  
13  
14 differentially associated with specific cognitive domains. Heavy housework was  
15  
16 associated with higher scores in the attention domain, while light housework was  
17  
18 associated with higher scores in both delayed and immediate memory domains in  
19  
20 older adults. Earlier studies reported that aerobic exercise interventions of varying  
21  
22 intensities improved specific cognitive function domains, including executive and  
23  
24 motor function, attention and memory, through an increase in hippocampal volume  
25  
26 and brain-derived neurotrophic factor expression <sup>32-34</sup>. Given that housework  
27  
28 accounted for a significant proportion (~24–36% in women and ~19–28% in men) of  
29  
30 self-reported moderate-to-vigorous-intensity PA among older adults aged above 60  
31  
32 <sup>14</sup>, it is plausible that the higher cognitive function associated with housework occurs  
33  
34 through a similar mechanism as PA or exercise <sup>14</sup>. More studies are required to  
35  
36 understand the underlying mechanisms driving the age-associated differing  
37  
38 associations of housework intensity with specific cognitive domains.  
39  
40  
41  
42  
43  
44  
45  
46

47 Poorer cognitive performance in attention and executive functions were associated  
48  
49 with poorer physical function, slower gait, postural instability, and future falls among  
50  
51 community-dwelling older adults <sup>35-37</sup>. We show that higher levels of heavy  
52  
53 housework activities were also independently associated with better physical (chair-  
54  
55 stand time) and sensorimotor (PPA) performance in older but not younger adults.

56  
57  
58 Among older Swedish adults, longer chair-stand time and poorer cognitive  
59  
60

1  
2  
3 performance (processing speed and executive function) independently increased the  
4 risk of injurious falls over 3–10 years by 10–23%<sup>38</sup>. Unlike older adults, younger  
5 adults have higher functional abilities and are unlikely to experience decline in  
6 sensorimotor and physical function, potentially explaining the lack of associations  
7 between housework activities with physical and sensorimotor performance. These  
8 results collectively suggest that the higher cognitive, physical and sensorimotor  
9 functions related to heavy housework activities might plausibly be associated with  
10 lower physiological fall risk among community-dwelling older adults.  
11  
12  
13  
14  
15  
16  
17  
18  
19  
20  
21  
22  
23

24 We compared the independent associations of light and heavy housework activities,  
25 and demonstrated that unlike heavy housework, light housework was not associated  
26 with physical or sensorimotor function. The lack of associations could be due to the  
27 already high functional ability of our study participants <sup>23</sup>. In support, compared with  
28 lower intensity exercise, greater improvements in functional ability and decreased  
29 fear of falling were observed after high intensity exercise in older adults <sup>39-41</sup>. These  
30 results indicate a dose-response effect for exercise intensity on physical and  
31 sensorimotor function and associated falls risk in older adults. Similarly, we propose  
32 that the positive associations between housework with physical and sensorimotor  
33 function is dependent on intensity, especially in community-dwelling older adults.  
34  
35  
36  
37  
38  
39  
40  
41  
42  
43  
44  
45  
46  
47  
48

49 Notably in this present study, 25% and 18% more participants in the younger and  
50 older group, respectively, met the PA guidelines derived exclusively from housework,  
51 than that attained solely through recreational PA. This finding reflects the challenges  
52 inherent with recreational PA participation, which is by definition, done during  
53 discretionary hours of the day outside of occupational and domestic duties.  
54  
55  
56  
57  
58  
59  
60

1  
2  
3 Incorporating PA into daily lifestyle through domestic duties (i.e., housework) has the  
4 potential to achieve higher PA, which is positively associated with functional health  
5 especially among older community-dwelling adults.  
6  
7  
8  
9  
10

11  
12 Our study recruited adults aged 21–80+ randomly from a large residential town  
13 representative of Singapore's population, suggesting a good degree of  
14 generalisability. We also included a comparison between older and younger adults in  
15 the study, to elucidate the age-associated effects of housework activities on  
16 cognitive, physical and sensorimotor function. However, although associations can  
17 be drawn from the study results, the cross-sectional design does not prove causality.  
18 It is plausible that healthier older adults with higher functional ability engaged in  
19 higher levels of housework. Nonetheless, in a 13-year follow-up study, productive  
20 housework activities such as cooking and shopping were associated with lower  
21 mortality risk in older adults <sup>42</sup>, suggesting that housework activities are associated  
22 with better health outcomes in older adults. The study findings in community-dwelling  
23 individuals cannot be generalised to institutionalised older adults, such as those in  
24 nursing homes. In the present study, housework and PA measures were self-  
25 reported based on type, intensity, frequency and duration per week. Although the  
26 LAPAQ and GPAQ used in this study is valid and reliable <sup>17,19</sup>, future studies using  
27 more objective measures of housework and PA should be undertaken. It is possible  
28 that socio-economic status may mediate the effects of housework on health <sup>43</sup>, which  
29 should be further examined in the Asian cultural context. While we adjusted for sex  
30 in all analyses, compared with low housework groups, participants in high housework  
31 groups were mostly women, which is consistent with earlier studies showing greater  
32  
33  
34  
35  
36  
37  
38  
39  
40  
41  
42  
43  
44  
45  
46  
47  
48  
49  
50  
51  
52  
53  
54  
55  
56  
57  
58  
59  
60

1  
2  
3 involvement in household chores among women than men <sup>44</sup>. Future studies should  
4  
5 investigate the sex-specific effects of housework on functional health.  
6  
7  
8  
9

10 In conclusion, our study suggests that a combination of light and heavy housework is  
11  
12 associated with higher cognitive function, specifically in attention and memory  
13  
14 domains, among community-dwelling older adults. Furthermore, the positive  
15  
16 associations of housework levels with physical and sensorimotor functions in older  
17  
18 adults were intensity-dependent. Housework may also complement recreational  
19  
20 physical activities among current older community-dwelling adults in high-income  
21  
22 countries towards healthier ageing. Future longitudinal and intervention studies are  
23  
24 required to establish causality between housework activities and functional health.  
25  
26  
27  
28  
29  
30  
31

### 32 **Funding**

33  
34 This work was supported by Geriatric Education and Research Institute (GERI)  
35  
36 intramural funding grant number [GERI 1609].  
37  
38  
39  
40  
41

### 42 **Acknowledgements**

43  
44 The authors gratefully acknowledge the strong support of Prof. Pang Weng Sun in  
45  
46 making this Yishun Study possible, and the support of Daniella Ng, Queenie Tan, Dr.  
47  
48 Lilian Chye, Sylvia Ngu Siew Ching, Aizuriah Mohamed Ali, Mary Ng Pei Ern, Chua  
49  
50 Xing Ying and Shermaine Thein in this study.  
51  
52  
53  
54  
55  
56  
57  
58  
59  
60



## Contributions

SYL performed the data analysis, interpretation, visualisation and wrote the manuscript. SLW, TPN, BWJP and LKL contributed to the study concept and design. BWJP, LKL, KAJ, WTS, KKC administered the project and collected the data. BWJP, LKL accessed and verified the underlying data. SLW, TPN contributed to the critical revision of the manuscript for important intellectual content. All authors read and approved the final manuscript.

## Declaration of Interest

None declared.

## Data sharing statement

The datasets used and/or analysed during the current study are available from the corresponding author on reasonable request.

## Ethics Approval Statement

This study involves human participants and was approved by an Ethics Committee(s) or Institutional Board(s) - [National Healthcare Group DSRB (2017/00212)].

## References

1. McPhee JS, French DP, Jackson D, Nazroo J, Pendleton N, Degens H. Physical activity in older age: perspectives for healthy ageing and frailty. *Biogerontology* 2016; **17**(3): 567-80.
2. Geidl W, Schlesinger S, Mino E, Miranda L, Pfeifer K. Dose-response relationship between physical activity and mortality in adults with noncommunicable diseases: a systematic review and meta-analysis of prospective observational studies. *Int J Behav Nutr Phys Act* 2020; **17**(1): 109.
3. Sherrington C, Fairhall N, Kwok W, et al. Evidence on physical activity and falls prevention for people aged 65+ years: systematic review to inform the WHO guidelines on physical activity and sedentary behaviour. *Int J Behav Nutr Phys Act* 2020; **17**(1): 144.
4. Guthold R, Stevens GA, Riley LM, Bull FC. Worldwide trends in insufficient physical activity from 2001 to 2016: a pooled analysis of 358 population-based surveys with 1&#xb7;9 million participants. *The Lancet Global Health* 2018; **6**(10): e1077-e86.
5. Lear SA, Hu W, Rangarajan S, et al. The effect of physical activity on mortality and cardiovascular disease in 130 000 people from 17 high-income, middle-income, and low-income countries: the PURE study. *Lancet* 2017; **390**(10113): 2643-54.
6. Cunningham C, R OS, Caserotti P, Tully MA. Consequences of physical inactivity in older adults: A systematic review of reviews and meta-analyses. *Scand J Med Sci Sports* 2020; **30**(5): 816-27.
7. Sherrington C, Michaleff ZA, Fairhall N, et al. Exercise to prevent falls in older adults: an updated systematic review and meta-analysis. *Br J Sports Med* 2017; **51**(24): 1750-8.

- 1  
2  
3 8. Lam FM, Huang MZ, Liao LR, Chung RC, Kwok TC, Pang MY. Physical  
4 exercise improves strength, balance, mobility, and endurance in people with  
5 cognitive impairment and dementia: a systematic review. *J Physiother* 2018; **64**(1):  
6 4-15.  
7
- 8  
9  
10  
11  
12 9. García-Hermoso A, Ramirez-Vélez R, Sáez de Asteasu ML, et al. Safety and  
13 Effectiveness of Long-Term Exercise Interventions in Older Adults: A Systematic  
14 Review and Meta-analysis of Randomized Controlled Trials. *Sports Med* 2020; **50**(6):  
15 1095-106.  
16
- 17  
18  
19  
20  
21 10. Stephan AJ, Strobl R, Müller M, et al. A high level of household physical  
22 activity compensates for lack of leisure time physical activity with regard to deficit  
23 accumulation: Results from the KORA-Age study. *Prev Med* 2016; **86**: 64-9.  
24
- 25  
26  
27  
28  
29 11. Koblinsky ND, Meusel L-AC, Greenwood CE, Anderson ND. Household  
30 physical activity is positively associated with gray matter volume in older adults. *BMC*  
31 *Geriatrics* 2021; **21**(1): 104.  
32
- 33  
34  
35  
36  
37 12. Tsuchiya K, Mitsui S, Fukuyama R, et al. An acute bout of housework  
38 activities has beneficial effects on executive function. *Neuropsychiatr Dis Treat* 2018;  
39 **14**: 61-72.  
40
- 41  
42  
43  
44  
45 13. Beard JR, Officer A, de Carvalho IA, et al. The World report on ageing and  
46 health: a policy framework for healthy ageing. *Lancet* 2016; **387**(10033): 2145-54.  
47
- 48  
49  
50  
51  
52 14. Murphy MH, Donnelly P, Breslin G, Shibli S, Nevill AM. Does doing  
53 housework keep you healthy? The contribution of domestic physical activity to  
54 meeting current recommendations for health. *BMC Public Health* 2013; **13**: 966.  
55
- 56  
57  
58  
59 15. Department of Statistics Singapore. Population and Population Structure.  
60 2020. [https://www.singstat.gov.sg/find-data/search-by-theme/population/population-  
and-population-structure/latest-data](https://www.singstat.gov.sg/find-data/search-by-theme/population/population-and-population-structure/latest-data) (accessed 25 March 2021 2021).

16. Pang BWJ, Wee SL, Lau LK, et al. Prevalence and Associated Factors of Sarcopenia in Singaporean Adults-The Yishun Study. *J Am Med Dir Assoc* 2020.
17. Stel VS, Smit JH, Pluijm SM, Visser M, Deeg DJ, Lips P. Comparison of the LASA Physical Activity Questionnaire with a 7-day diary and pedometer. *J Clin Epidemiol* 2004; **57**(3): 252-8.
18. Siebeling L, Wiebers S, Beem L, Puhan MA, Ter Riet G. Validity and reproducibility of a physical activity questionnaire for older adults: questionnaire versus accelerometer for assessing physical activity in older adults. *Clin Epidemiol* 2012; **4**: 171-80.
19. Bull FC, Maslin TS, Armstrong T. Global physical activity questionnaire (GPAQ): nine country reliability and validity study. *J Phys Act Health* 2009; **6**(6): 790-804.
20. Haskell WL, Lee IM, Pate RR, et al. Physical activity and public health: updated recommendation for adults from the American College of Sports Medicine and the American Heart Association. *Med Sci Sports Exerc* 2007; **39**(8): 1423-34.
21. Randolph C, Tierney MC, Mohr E, Chase TN. The Repeatable Battery for the Assessment of Neuropsychological Status (RBANS): preliminary clinical validity. *J Clin Exp Neuropsychol* 1998; **20**(3): 310-9.
22. Guralnik JM, Ferrucci L, Simonsick EM, Salive ME, Wallace RB. Lower-extremity function in persons over the age of 70 years as a predictor of subsequent disability. *N Engl J Med* 1995; **332**(9): 556-61.
23. Lee SY, Choo PL, Pang BWJ, et al. SPPB reference values and performance in assessing sarcopenia in community-dwelling Singaporeans – Yishun study. *BMC Geriatrics* 2021; **21**(1): 213.

- 1  
2  
3 24. Lord SR, Ward JA, Williams P, Anstey KJ. Physiological factors associated  
4 with falls in older community-dwelling women. *J Am Geriatr Soc* 1994; **42**(10): 1110-  
5  
6  
7  
8 7.
- 9  
10 25. Lord SR, Menz HB, Tiedemann A. A Physiological Profile Approach to Falls  
11 Risk Assessment and Prevention. *Physical Therapy* 2003; **83**(3): 237-52.
- 12  
13 26. Lakens D. Calculating and reporting effect sizes to facilitate cumulative  
14 science: a practical primer for t-tests and ANOVAs. *Front Psychol* 2013; **4**: 863.
- 15  
16 27. Jiang C, Xu Y. The association between mild cognitive impairment and doing  
17 housework. *Aging Ment Health* 2014; **18**(2): 212-6.
- 18  
19 28. Peng Z, Jiang H, Wang X, et al. The Efficacy of Cognitive Training for Elderly  
20 Chinese Individuals with Mild Cognitive Impairment. *Biomed Res Int* 2019; **2019**:  
21 4347281.
- 22  
23 29. Colcombe SJ, Erickson KI, Scalf PE, et al. Aerobic Exercise Training  
24 Increases Brain Volume in Aging Humans. *The Journals of Gerontology: Series A*  
25 2006; **61**(11): 1166-70.
- 26  
27 30. Erickson KI, Leckie RL, Weinstein AM. Physical activity, fitness, and gray  
28 matter volume. *Neurobiology of Aging* 2014; **35**: S20-S8.
- 29  
30 31. Clouston SAP, Smith DM, Mukherjee S, et al. Education and Cognitive  
31 Decline: An Integrative Analysis of Global Longitudinal Studies of Cognitive Aging.  
32 *The Journals of Gerontology: Series B* 2020; **75**(7): e151-e60.
- 33  
34 32. Angevaren M, Aufdemkampe G, Verhaar HJ, Aleman A, Vanhees L. Physical  
35 activity and enhanced fitness to improve cognitive function in older people without  
36 known cognitive impairment. *Cochrane Database Syst Rev* 2008; (3): Cd005381.
- 37  
38 33. Gomez-Pinilla F, Hillman C. The influence of exercise on cognitive abilities.  
39 *Compr Physiol* 2013; **3**(1): 403-28.
- 40  
41  
42  
43  
44  
45  
46  
47  
48  
49  
50  
51  
52  
53  
54  
55  
56  
57  
58  
59  
60

- 1  
2  
3 34. Smith PJ, Blumenthal JA, Hoffman BM, et al. Aerobic exercise and  
4 neurocognitive performance: a meta-analytic review of randomized controlled trials.  
5  
6 *Psychosom Med* 2010; **72**(3): 239-52.  
7  
8  
9  
10 35. Tabbarah M, Crimmins EM, Seeman TE. The Relationship Between Cognitive  
11 and Physical Performance: MacArthur Studies of Successful Aging. *The Journals of*  
12 *Gerontology: Series A* 2002; **57**(4): M228-M35.  
13  
14  
15  
16 36. Montero-Odasso M, Speechley M. Falls in Cognitively Impaired Older Adults:  
17 Implications for Risk Assessment And Prevention. *J Am Geriatr Soc* 2018; **66**(2):  
18 367-75.  
19  
20  
21  
22  
23 37. Muir SW, Gopaul K, Montero Odasso MM. The role of cognitive impairment in  
24 fall risk among older adults: a systematic review and meta-analysis. *Age and Ageing*  
25 2012; **41**(3): 299-308.  
26  
27  
28  
29 38. Welmer A-K, Rizzuto D, Laukka EJ, Johnell K, Fratiglioni L. Cognitive and  
30 Physical Function in Relation to the Risk of Injurious Falls in Older Adults: A  
31 Population-Based Study. *The Journals of Gerontology: Series A* 2017; **72**(5): 669-75.  
32  
33  
34  
35 39. Sanders LMJ, Hortobágyi T, Karssemeijer EGA, Van der Zee EA, Scherder  
36 EJA, van Heuvelen MJG. Effects of low- and high-intensity physical exercise on  
37 physical and cognitive function in older persons with dementia: a randomized  
38 controlled trial. *Alzheimers Res Ther* 2020; **12**(1): 28.  
39  
40  
41  
42  
43 40. Jiménez-García JD, Hita-Contreras F, de la Torre-Cruz M, et al. Risk of Falls  
44 in Healthy Older Adults: Benefits of High-Intensity Interval Training Using Lower  
45 Body Suspension Exercises. *J Aging Phys Act* 2019; **27**(3): 325-33.  
46  
47  
48  
49 41. Edholm P, Nilsson A, Kadi F. Physical function in older adults: Impacts of past  
50 and present physical activity behaviors. *Scand J Med Sci Sports* 2019; **29**(3): 415-  
51 21.  
52  
53  
54  
55  
56  
57  
58  
59  
60

- 1  
2  
3 42. Glass TA, de Leon CM, Marottoli RA, Berkman LF. Population based study of  
4 social and productive activities as predictors of survival among elderly Americans.  
5  
6  
7 *Bmj* 1999; **319**(7208): 478-83.  
8  
9  
10 43. Rodriguez-Stanley J, Alonso-Ferres M, Zilioli S, Slatcher RB. Housework,  
11 health, and well-being in older adults: The role of socioeconomic status. *J Fam*  
12  
13  
14 *Psychol* 2020; **34**(5): 610-20.  
15  
16  
17 44. Bianchi SM, Sayer LC, Milkie MA, Robinson JP. Housework: Who Did, Does  
18 or Will Do It, and How Much Does It Matter? *Soc Forces* 2012; **91**(1): 55-63.  
19  
20  
21  
22  
23  
24  
25  
26  
27  
28  
29  
30  
31  
32  
33  
34  
35  
36  
37  
38  
39  
40  
41  
42  
43  
44  
45  
46  
47  
48  
49  
50  
51  
52  
53  
54  
55  
56  
57  
58  
59  
60

**Table 1.** Mean (SD) Participant characteristics for high and low heavy housework and light housework groups, within younger and older groups.

|                                    | Heavy Housework (HH) |             |                  | Light Housework (LH) |             |                  |
|------------------------------------|----------------------|-------------|------------------|----------------------|-------------|------------------|
|                                    | Low                  | High        | <i>p</i> value   | Low                  | High        | <i>p</i> value   |
| <b>Younger</b>                     |                      |             |                  |                      |             |                  |
| <i>n</i>                           | 100                  | 149         |                  | 137                  | 112         |                  |
| Sex, Female (n (%))                | 48 (48)              | 94 (63)     |                  | 62 (45)              | 80 (71)     |                  |
| Age (years)                        | 43 (15)              | 44 (13)     | 0.516            | 42 (14)              | 46 (13)     | <b>0.015</b>     |
| Education (Years)                  | 12 (4)               | 12 (4)      | 0.493            | 13 (4)               | 11 (4)      | <b>&lt;0.001</b> |
| Height (m)                         | 1.64 (0.09)          | 1.62 (0.08) | 0.115            | 1.65 (0.08)          | 1.60 (0.08) | <b>&lt;0.001</b> |
| Weight (kg)                        | 68.0 (15.2)          | 67.7 (17.3) | 0.875            | 69.0 (17.2)          | 66.4 (15.5) | 0.219            |
| Body Mass Index                    | 25.2 (4.8)           | 25.6 (5.6)  | 0.557            | 25.1 (5.4)           | 25.8 (5.2)  | 0.324            |
| Physical Activity (GPAQ)           |                      |             |                  |                      |             |                  |
| <i>Recreational (MET min/week)</i> | 576 (784)            | 774 (1302)  | 0.137            | 637 (933)            | 764 (1324)  | 0.393            |
| <i>Transport (MET min/week)</i>    | 2065 (3010)          | 2003 (2228) | 0.861            | 1577 (1955)          | 2579 (3075) | <b>0.003</b>     |
| <i>Occupational (MET min/week)</i> | 1686 (3619)          | 2408 (5658) | 0.220            | 2052 (4252)          | 2199 (5699) | 0.821            |
| <i>Total (MET min/week)</i>        | 4327 (5151)          | 5185 (6903) | 0.263            | 4266 (4971)          | 5543 (7511) | 0.125            |
| Housework Activity (LAPAQ)         |                      |             |                  |                      |             |                  |
| <i>Heavy (min/week)</i>            | 0 (2)                | 192 (292)   | <b>&lt;0.001</b> | 47 (81)              | 198 (335)   | <b>&lt;0.001</b> |
| <i>Light (min/week)</i>            | 198 (363)            | 584 (593)   | <b>&lt;0.001</b> | 95 (87)              | 838 (592)   | <b>&lt;0.001</b> |
| <i>Total (MET min/week)</i>        | 496 (908)            | 2228 (2079) | <b>&lt;0.001</b> | 425 (458)            | 2887 (2120) | <b>&lt;0.001</b> |
| <b>Older</b>                       |                      |             |                  |                      |             |                  |
| <i>n</i>                           | 132                  | 108         |                  | 103                  | 137         |                  |
| Sex, Female (n (%))                | 63 (48)              | 74 (69)     |                  | 39 (38)              | 98 (72)     |                  |
| Age (Years)                        | 77 (6)               | 73 (6)      | <b>&lt;0.001</b> | 77 (7)               | 74 (6)      | <b>0.004</b>     |
| Education (Years)                  | 6 (4)                | 7 (5)       | 0.168            | 7 (5)                | 7 (5)       | 0.764            |
| Height (m)                         | 1.57 (0.09)          | 1.57 (0.08) | 0.987            | 1.58 (0.08)          | 1.56 (0.08) | 0.064            |
| Weight (kg)                        | 60.1 (10.3)          | 58.5 (9.6)  | 0.192            | 60.4 (9.8)           | 58.6 (10.1) | 0.161            |
| Body Mass Index                    | 24.5 (3.7)           | 23.8 (3.3)  | 0.102            | 24.2 (3.5)           | 24.1 (3.5)  | 0.778            |
| Physical Activity (GPAQ)           |                      |             |                  |                      |             |                  |
| <i>Recreational (MET min/week)</i> | 828 (1053)           | 890 (1047)  | 0.650            | 867 (1181)           | 847 (941)   | 0.884            |
| <i>Transport (MET min/week)</i>    | 1561 (1565)          | 1836 (2050) | 0.253            | 1554 (1964)          | 1783 (1667) | 0.340            |
| <i>Occupational (MET min/week)</i> | 676 (2269)           | 401 (1397)  | 0.251            | 547 (2113)           | 557 (1783)  | 0.968            |
| <i>Total (MET min/week)</i>        | 3065 (2731)          | 3127 (2531) | 0.856            | 2968 (2968)          | 3187 (2366) | 0.537            |
| Housework Activity (LAPAQ)         |                      |             |                  |                      |             |                  |



|    |                         |             |            |                  |           |            |                  |
|----|-------------------------|-------------|------------|------------------|-----------|------------|------------------|
| 1  |                         |             |            |                  |           |            |                  |
| 2  |                         |             |            |                  |           |            |                  |
| 3  |                         |             |            |                  |           |            |                  |
| 4  | <i>Heavy (min/week)</i> | 0 (0)       | 131 (140)  | <b>&lt;0.001</b> | 31 (72)   | 80 (134)   | <b>&lt;0.001</b> |
| 5  | <i>Light (min/week)</i> | 446 (508)   | 684 (568)  | <b>&lt;0.001</b> | 89 (93)   | 902 (485)  | <b>&lt;0.001</b> |
| 6  |                         |             |            |                  |           |            |                  |
| 7  | <i>Total (MET</i>       |             | 2236 (1584 |                  |           | 2576 (1349 | <b>&lt;0.001</b> |
| 8  | <i>min/week)</i>        | 1116 (1270) | )          | <b>&lt;0.001</b> | 347 (377) | )          | <b>&lt;0.001</b> |
| 9  |                         |             |            |                  |           |            |                  |
| 10 |                         |             |            |                  |           |            |                  |
| 11 |                         |             |            |                  |           |            |                  |
| 12 |                         |             |            |                  |           |            |                  |
| 13 |                         |             |            |                  |           |            |                  |
| 14 |                         |             |            |                  |           |            |                  |
| 15 |                         |             |            |                  |           |            |                  |
| 16 |                         |             |            |                  |           |            |                  |
| 17 |                         |             |            |                  |           |            |                  |
| 18 |                         |             |            |                  |           |            |                  |
| 19 |                         |             |            |                  |           |            |                  |
| 20 |                         |             |            |                  |           |            |                  |
| 21 |                         |             |            |                  |           |            |                  |
| 22 |                         |             |            |                  |           |            |                  |
| 23 |                         |             |            |                  |           |            |                  |
| 24 |                         |             |            |                  |           |            |                  |
| 25 |                         |             |            |                  |           |            |                  |
| 26 |                         |             |            |                  |           |            |                  |
| 27 |                         |             |            |                  |           |            |                  |
| 28 |                         |             |            |                  |           |            |                  |
| 29 |                         |             |            |                  |           |            |                  |
| 30 |                         |             |            |                  |           |            |                  |
| 31 |                         |             |            |                  |           |            |                  |
| 32 |                         |             |            |                  |           |            |                  |
| 33 |                         |             |            |                  |           |            |                  |
| 34 |                         |             |            |                  |           |            |                  |
| 35 |                         |             |            |                  |           |            |                  |
| 36 |                         |             |            |                  |           |            |                  |
| 37 |                         |             |            |                  |           |            |                  |
| 38 |                         |             |            |                  |           |            |                  |
| 39 |                         |             |            |                  |           |            |                  |
| 40 |                         |             |            |                  |           |            |                  |
| 41 |                         |             |            |                  |           |            |                  |
| 42 |                         |             |            |                  |           |            |                  |
| 43 |                         |             |            |                  |           |            |                  |
| 44 |                         |             |            |                  |           |            |                  |
| 45 |                         |             |            |                  |           |            |                  |
| 46 |                         |             |            |                  |           |            |                  |
| 47 |                         |             |            |                  |           |            |                  |
| 48 |                         |             |            |                  |           |            |                  |
| 49 |                         |             |            |                  |           |            |                  |
| 50 |                         |             |            |                  |           |            |                  |
| 51 |                         |             |            |                  |           |            |                  |
| 52 |                         |             |            |                  |           |            |                  |
| 53 |                         |             |            |                  |           |            |                  |
| 54 |                         |             |            |                  |           |            |                  |
| 55 |                         |             |            |                  |           |            |                  |
| 56 |                         |             |            |                  |           |            |                  |
| 57 |                         |             |            |                  |           |            |                  |
| 58 |                         |             |            |                  |           |            |                  |
| 59 |                         |             |            |                  |           |            |                  |
| 60 |                         |             |            |                  |           |            |                  |

For peer review only

## Figure captions

**Figure 1.** Mean (SD) of global cognitive function and specific domains between high and low heavy housework groups, within younger and older adults. \* $p < 0.05$ , adjusted for age, sex and time spent on light housework per week.

**Figure 2.** Mean (SD) of global cognitive function and specific domains between high and low light housework groups, within younger and older adults. \* $p < 0.05$ , \*\* $p < 0.01$ , \*\*\* $p < 0.001$ , adjusted for age, sex, height, years of education, transport-related physical activity and time spent on heavy housework per week.

**Figure 3.** Mean (SD) of physical function measures including total short physical performance battery score (a), 6m habitual gait speed (b), and five-times repeated chair sit-to-stand time (c), and sensorimotor function measure including physiological profile assessment (d), between high and low heavy housework groups, within younger and older adults. \* $p < 0.05$ , adjusted for age, sex and time spent on light housework per week.

**Figure 4.** Mean (SD) of physical function measures including total short physical performance battery score (a), 6m habitual gait speed (b), and five-times repeated chair sit-to-stand time (c), and sensorimotor function measure including physiological profile assessment (d), between high and low light housework groups, within younger and older adults. All  $p > 0.05$ , adjusted for age, sex, height, years of education, transport-related physical activity and time spent on heavy housework per week.

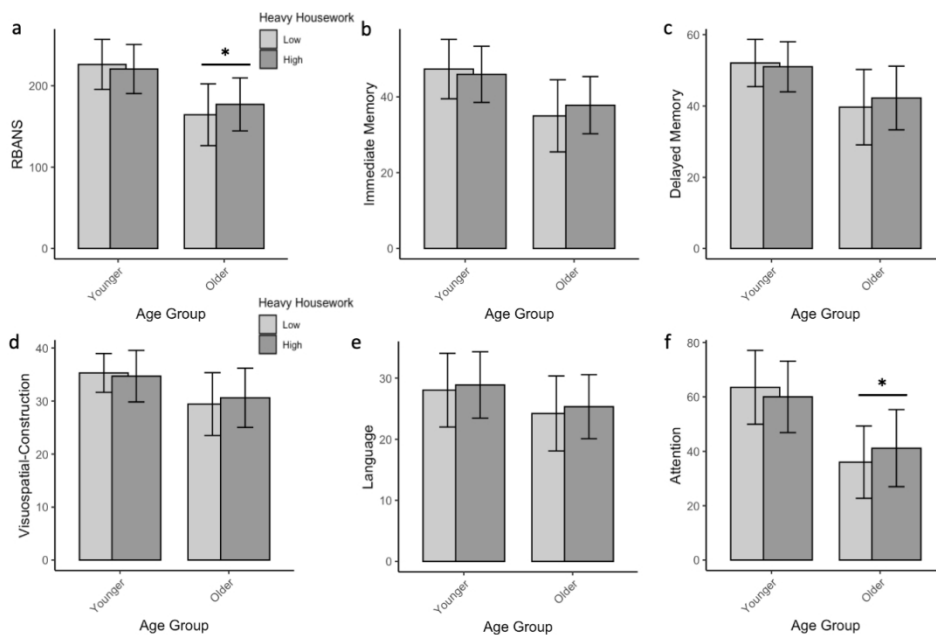

Figure 1. Mean (SD) of global cognitive function and specific domains between high and low heavy housework groups, within younger and older adults. \* $p < 0.05$ , adjusted for age, sex and time spent on light housework per week.

294x190mm (124 x 124 DPI)

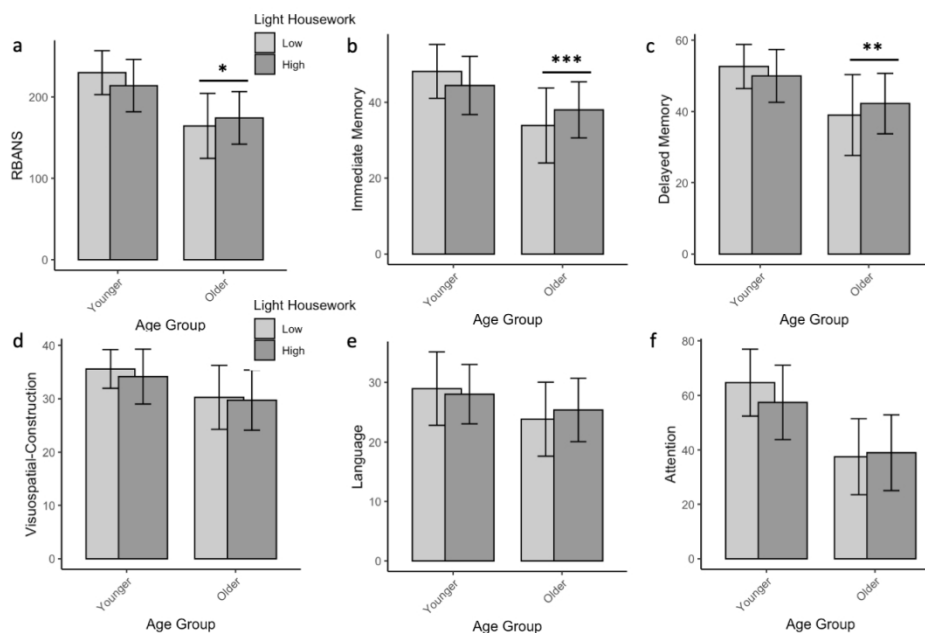

Figure 2. Mean (SD) of global cognitive function and specific domains between high and low light housework groups, within younger and older adults. \* $p < 0.05$ , \*\* $p < 0.01$ , \*\*\* $p < 0.001$ , adjusted for age, sex, height, years of education, transport-related physical activity and time spent on heavy housework per week.

294x190mm (124 x 124 DPI)

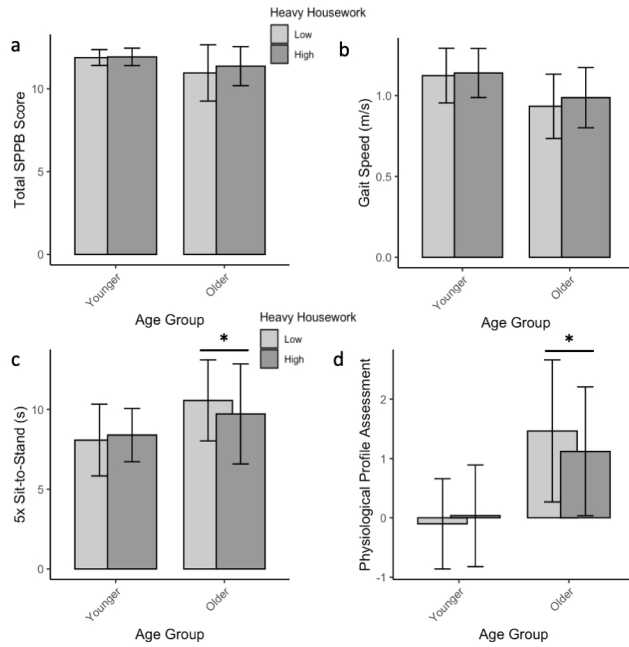

Figure 3. Mean (SD) of physical function measures including total short physical performance battery score (a), 6m habitual gait speed (b), and five-times repeated chair sit-to-stand time (c), and sensorimotor function measure including physiological profile assessment (d), between high and low heavy housework groups, within younger and older adults. \*p<0.05, adjusted for age, sex and time spent on light housework per week.

294x190mm (124 x 124 DPI)

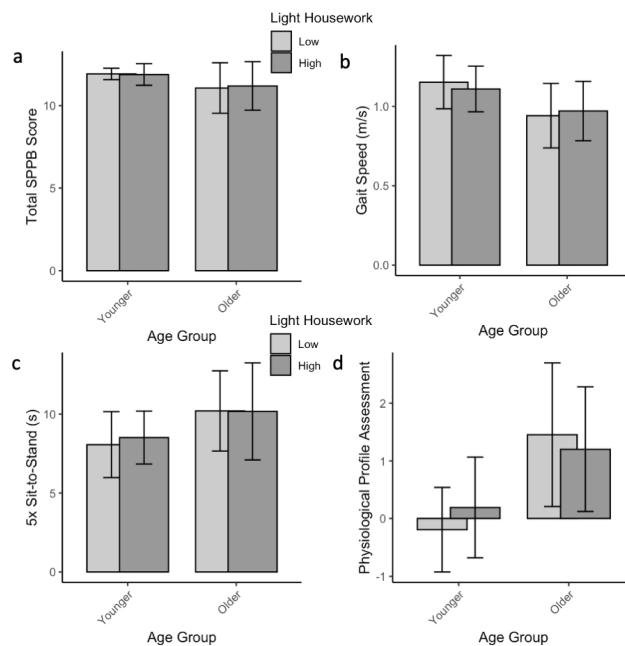

Figure 4. Mean (SD) of physical function measures including total short physical performance battery score (a), 6m habitual gait speed (b), and five-times repeated chair sit-to-stand time (c), and sensorimotor function measure including physiological profile assessment (d), between high and low light housework groups, within younger and older adults. All  $p > 0.05$ , adjusted for age, sex, height, years of education, transport-related physical activity and time spent on heavy housework per week.

294x190mm (124 x 124 DPI)

**Supplementary Table S1.** Mean (SD) of cognitive, physical and sensorimotor functions stratified by heavy housework and light housework groups, between younger and older participants.

|                                    | Heavy Housework (HH) |                |                |                | Light Housework (LH) |                |                |                |
|------------------------------------|----------------------|----------------|----------------|----------------|----------------------|----------------|----------------|----------------|
|                                    | Younger              |                | Older          |                | Younger              |                | Older          |                |
|                                    | <i>Low</i>           | <i>High</i>    | <i>Low</i>     | <i>High</i>    | <i>Low</i>           | <i>High</i>    | <i>Low</i>     | <i>High</i>    |
| <i>n</i>                           | 100                  | 149            | 132            | 108            | 137                  | 112            | 103            | 137            |
| <b>Cognitive function (Scores)</b> |                      |                |                |                |                      |                |                |                |
| RBANS                              | 226<br>(31)          | 220<br>(30)    | 164<br>(38)    | 177<br>(33)    | 230<br>(27)          | 214<br>(32)    | 165<br>(40)    | 174<br>(32)    |
| Immediate-Memory                   | 47 (8)               | 46 (7)         | 35 (10)        | 38 (8)         | 48 (7)               | 44 (8)         | 34 (10)        | 38 (7)         |
| Delayed-Memory                     | 52 (7)               | 51 (7)         | 40 (11)        | 42 (9)         | 53 (6)               | 50 (7)         | 39 (11)        | 42 (8)         |
| Visuospatial-Construction          | 35 (4)               | 35 (5)         | 29 (6)         | 31 (6)         | 36 (4)               | 34 (5)         | 30 (6)         | 30 (6)         |
| Language                           | 28 (6)               | 29 (5)         | 24 (6)         | 25 (5)         | 29 (6)               | 28 (5)         | 24 (6)         | 25 (5)         |
| Attention                          | 64 (14)              | 60 (13)        | 36 (13)        | 41 (14)        | 65 (12)              | 57 (14)        | 38 (14)        | 39 (14)        |
| <b>Physical function</b>           |                      |                |                |                |                      |                |                |                |
| SPPB score                         | 11.9<br>(0.5)        | 11.9<br>(0.5)  | 11.0<br>(1.7)  | 11.4<br>(1.2)  | 11.9<br>(0.3)        | 11.9<br>(0.7)  | 11.1<br>(1.5)  | 11.2<br>(1.5)  |
| Gait Speed (m/s)                   | 1.1<br>(0.2)         | 1.1<br>(0.2)   | 0.9<br>(0.2)   | 1.0<br>(0.2)   | 1.2<br>(0.2)         | 1.1<br>(0.1)   | 0.9<br>(0.2)   | 1.0<br>(0.2)   |
| 5x Sit-to-stand (s)                | 8.1<br>(2.2)         | 8.4<br>(1.7)   | 10.6<br>(2.5)  | 9.7<br>(3.1)   | 8.1<br>(2.1)         | 8.5<br>(1.7)   | 10.2<br>(2.5)  | 10.2<br>(3.1)  |
| <b>Sensorimotor function</b>       |                      |                |                |                |                      |                |                |                |
| Physiological Profile Assessment   | -0.10<br>(0.76)      | 0.04<br>(0.86) | 1.46<br>(1.20) | 1.12<br>(1.09) | -0.19<br>(0.73)      | 0.19<br>(0.87) | 1.45<br>(1.24) | 1.20<br>(1.08) |

# Reporting checklist for cross sectional study.

Based on the STROBE cross sectional guidelines.

## Instructions to authors

Complete this checklist by entering the page numbers from your manuscript where readers will find each of the items listed below.

Your article may not currently address all the items on the checklist. Please modify your text to include the missing information. If you are certain that an item does not apply, please write "n/a" and provide a short explanation.

Upload your completed checklist as an extra file when you submit to a journal.

In your methods section, say that you used the STROBE cross sectional reporting guidelines, and cite them as:

von Elm E, Altman DG, Egger M, Pocock SJ, Gotsche PC, Vandenbroucke JP. The Strengthening the Reporting of Observational Studies in Epidemiology (STROBE) Statement: guidelines for reporting observational studies.

|                           |                     | Reporting Item                                                                                  | Page Number |
|---------------------------|---------------------|-------------------------------------------------------------------------------------------------|-------------|
| <b>Title and abstract</b> |                     |                                                                                                 |             |
| Title                     | <a href="#">#1a</a> | Indicate the study's design with a commonly used term in the title or the abstract              | 1           |
| Abstract                  | <a href="#">#1b</a> | Provide in the abstract an informative and balanced summary of what was done and what was found | 2           |
| <b>Introduction</b>       |                     |                                                                                                 |             |
| Background / rationale    | <a href="#">#2</a>  | Explain the scientific background and rationale for the investigation being reported            | 5           |
| Objectives                | <a href="#">#3</a>  | State specific objectives, including any prespecified hypotheses                                | 6           |
| <b>Methods</b>            |                     |                                                                                                 |             |
| Study design              | <a href="#">#4</a>  | Present key elements of study design early in the paper                                         | 7           |
| Setting                   | <a href="#">#5</a>  | Describe the setting, locations, and relevant dates, including periods of                       | 6           |



|    |                      |                                                                                                              |        |
|----|----------------------|--------------------------------------------------------------------------------------------------------------|--------|
|    |                      | recruitment, exposure, follow-up, and data collection                                                        |        |
| 1  |                      |                                                                                                              |        |
| 2  |                      |                                                                                                              |        |
| 3  | Eligibility criteria | <a href="#">#6a</a> Give the eligibility criteria, and the sources and methods of selection of participants. | 7      |
| 4  |                      |                                                                                                              |        |
| 5  |                      |                                                                                                              |        |
| 6  |                      | <a href="#">#7</a> Clearly define all outcomes, exposures, predictors, potential                             | 7-10   |
| 7  |                      | confounders, and effect modifiers. Give diagnostic criteria, if applicable                                   |        |
| 8  |                      |                                                                                                              |        |
| 9  |                      |                                                                                                              |        |
| 10 | Data sources /       | <a href="#">#8</a> For each variable of interest give sources of data and details of methods                 | 7-10   |
| 11 | measurement          | of assessment (measurement). Describe comparability of assessment                                            |        |
| 12 |                      | methods if there is more than one group. Give information separately                                         |        |
| 13 |                      | for for exposed and unexposed groups if applicable.                                                          |        |
| 14 |                      |                                                                                                              |        |
| 15 |                      |                                                                                                              |        |
| 16 |                      |                                                                                                              |        |
| 17 | Bias                 | <a href="#">#9</a> Describe any efforts to address potential sources of bias                                 | NA     |
| 18 |                      |                                                                                                              |        |
| 19 | Study size           | <a href="#">#10</a> Explain how the study size was arrived at                                                | 10     |
| 20 |                      |                                                                                                              |        |
| 21 | Quantitative         | <a href="#">#11</a> Explain how quantitative variables were handled in the analyses. If                      | 10     |
| 22 | variables            | applicable, describe which groupings were chosen, and why                                                    |        |
| 23 |                      |                                                                                                              |        |
| 24 |                      |                                                                                                              |        |
| 25 | Statistical          | <a href="#">#12a</a> Describe all statistical methods, including those used to control for                   | 10, 12 |
| 26 | methods              | confounding                                                                                                  |        |
| 27 |                      |                                                                                                              |        |
| 28 |                      |                                                                                                              |        |
| 29 | Statistical          | <a href="#">#12b</a> Describe any methods used to examine subgroups and interactions                         | 10     |
| 30 | methods              |                                                                                                              |        |
| 31 |                      |                                                                                                              |        |
| 32 |                      |                                                                                                              |        |
| 33 | Statistical          | <a href="#">#12c</a> Explain how missing data were addressed                                                 | NA     |
| 34 | methods              |                                                                                                              |        |
| 35 |                      |                                                                                                              |        |
| 36 |                      |                                                                                                              |        |
| 37 | Statistical          | <a href="#">#12d</a> If applicable, describe analytical methods taking account of sampling                   | NA     |
| 38 | methods              | strategy                                                                                                     |        |
| 39 |                      |                                                                                                              |        |
| 40 |                      |                                                                                                              |        |
| 41 | Statistical          | <a href="#">#12e</a> Describe any sensitivity analyses                                                       | NA     |
| 42 | methods              |                                                                                                              |        |
| 43 |                      |                                                                                                              |        |
| 44 | <b>Results</b>       |                                                                                                              |        |
| 45 |                      |                                                                                                              |        |
| 46 | Participants         | <a href="#">#13a</a> Report numbers of individuals at each stage of study—eg numbers                         | 11     |
| 47 |                      | potentially eligible, examined for eligibility, confirmed eligible,                                          |        |
| 48 |                      | included in the study, completing follow-up, and analysed. Give                                              |        |
| 49 |                      | information separately for for exposed and unexposed groups if                                               |        |
| 50 |                      | applicable.                                                                                                  |        |
| 51 |                      |                                                                                                              |        |
| 52 |                      |                                                                                                              |        |
| 53 |                      |                                                                                                              |        |
| 54 |                      |                                                                                                              |        |
| 55 | Participants         | <a href="#">#13b</a> Give reasons for non-participation at each stage                                        | NA     |
| 56 |                      |                                                                                                              |        |
| 57 | Participants         | <a href="#">#13c</a> Consider use of a flow diagram                                                          | NA     |
| 58 |                      |                                                                                                              |        |
| 59 |                      |                                                                                                              |        |
| 60 |                      |                                                                                                              |        |

|    |                    |                      |                                                                                                                                                                                                                   |       |
|----|--------------------|----------------------|-------------------------------------------------------------------------------------------------------------------------------------------------------------------------------------------------------------------|-------|
| 1  | Descriptive data   | <a href="#">#14a</a> | Give characteristics of study participants (eg demographic, clinical, social) and information on exposures and potential confounders. Give information separately for exposed and unexposed groups if applicable. | 11    |
| 2  |                    |                      |                                                                                                                                                                                                                   |       |
| 3  |                    |                      |                                                                                                                                                                                                                   |       |
| 4  |                    |                      |                                                                                                                                                                                                                   |       |
| 5  |                    |                      |                                                                                                                                                                                                                   |       |
| 6  | Descriptive data   | <a href="#">#14b</a> | Indicate number of participants with missing data for each variable of interest                                                                                                                                   | NA    |
| 7  |                    |                      |                                                                                                                                                                                                                   |       |
| 8  |                    |                      |                                                                                                                                                                                                                   |       |
| 9  |                    |                      |                                                                                                                                                                                                                   |       |
| 10 | Outcome data       | <a href="#">#15</a>  | Report numbers of outcome events or summary measures. Give information separately for exposed and unexposed groups if applicable.                                                                                 | 12-14 |
| 11 |                    |                      |                                                                                                                                                                                                                   |       |
| 12 |                    |                      |                                                                                                                                                                                                                   |       |
| 13 |                    |                      |                                                                                                                                                                                                                   |       |
| 14 | Main results       | <a href="#">#16a</a> | Give unadjusted estimates and, if applicable, confounder-adjusted estimates and their precision (eg, 95% confidence interval). Make clear which confounders were adjusted for and why they were included          | 12-14 |
| 15 |                    |                      |                                                                                                                                                                                                                   |       |
| 16 |                    |                      |                                                                                                                                                                                                                   |       |
| 17 |                    |                      |                                                                                                                                                                                                                   |       |
| 18 |                    |                      |                                                                                                                                                                                                                   |       |
| 19 | Main results       | <a href="#">#16b</a> | Report category boundaries when continuous variables were categorized                                                                                                                                             | NA    |
| 20 |                    |                      |                                                                                                                                                                                                                   |       |
| 21 | Main results       | <a href="#">#16c</a> | If relevant, consider translating estimates of relative risk into absolute risk for a meaningful time period                                                                                                      | NA    |
| 22 |                    |                      |                                                                                                                                                                                                                   |       |
| 23 |                    |                      |                                                                                                                                                                                                                   |       |
| 24 |                    |                      |                                                                                                                                                                                                                   |       |
| 25 | Other analyses     | <a href="#">#17</a>  | Report other analyses done—e.g., analyses of subgroups and interactions, and sensitivity analyses                                                                                                                 | NA    |
| 26 |                    |                      |                                                                                                                                                                                                                   |       |
| 27 |                    |                      |                                                                                                                                                                                                                   |       |
| 28 |                    |                      |                                                                                                                                                                                                                   |       |
| 29 | <b>Discussion</b>  |                      |                                                                                                                                                                                                                   |       |
| 30 |                    |                      |                                                                                                                                                                                                                   |       |
| 31 | Key results        | <a href="#">#18</a>  | Summarise key results with reference to study objectives                                                                                                                                                          | 14    |
| 32 |                    |                      |                                                                                                                                                                                                                   |       |
| 33 |                    |                      |                                                                                                                                                                                                                   |       |
| 34 | Limitations        | <a href="#">#19</a>  | Discuss limitations of the study, taking into account sources of potential bias or imprecision. Discuss both direction and magnitude of any potential bias.                                                       | 17    |
| 35 |                    |                      |                                                                                                                                                                                                                   |       |
| 36 |                    |                      |                                                                                                                                                                                                                   |       |
| 37 |                    |                      |                                                                                                                                                                                                                   |       |
| 38 |                    |                      |                                                                                                                                                                                                                   |       |
| 39 | Interpretation     | <a href="#">#20</a>  | Give a cautious overall interpretation considering objectives, limitations, multiplicity of analyses, results from similar studies, and other relevant evidence.                                                  | 14-17 |
| 40 |                    |                      |                                                                                                                                                                                                                   |       |
| 41 |                    |                      |                                                                                                                                                                                                                   |       |
| 42 |                    |                      |                                                                                                                                                                                                                   |       |
| 43 |                    |                      |                                                                                                                                                                                                                   |       |
| 44 | Generalisability   | <a href="#">#21</a>  | Discuss the generalisability (external validity) of the study results                                                                                                                                             | 17    |
| 45 |                    |                      |                                                                                                                                                                                                                   |       |
| 46 |                    |                      |                                                                                                                                                                                                                   |       |
| 47 | <b>Other</b>       |                      |                                                                                                                                                                                                                   |       |
| 48 | <b>Information</b> |                      |                                                                                                                                                                                                                   |       |
| 49 |                    |                      |                                                                                                                                                                                                                   |       |
| 50 |                    |                      |                                                                                                                                                                                                                   |       |
| 51 | Funding            | <a href="#">#22</a>  | Give the source of funding and the role of the funders for the present study and, if applicable, for the original study on which the present article is based                                                     | 18    |
| 52 |                    |                      |                                                                                                                                                                                                                   |       |
| 53 |                    |                      |                                                                                                                                                                                                                   |       |
| 54 |                    |                      |                                                                                                                                                                                                                   |       |
| 55 |                    |                      |                                                                                                                                                                                                                   |       |

The STROBE checklist is distributed under the terms of the Creative Commons Attribution License CC-BY.

This checklist was completed on 05. April 2021 using <https://www.goodreports.org/>, a tool made by the

[EQUATOR Network](#) in collaboration with [Penelope.ai](#)

For peer review only - <http://bmjopen.bmj.com/site/about/guidelines.xhtml>

# BMJ Open

## Cross-sectional associations of housework with cognitive, physical and sensorimotor functions in younger and older community-dwelling adults – the Yishun Study

|                                 |                                                                                                                                                                                                                                                                                                                                                                                                                                                                                                                                                                                                                                                              |
|---------------------------------|--------------------------------------------------------------------------------------------------------------------------------------------------------------------------------------------------------------------------------------------------------------------------------------------------------------------------------------------------------------------------------------------------------------------------------------------------------------------------------------------------------------------------------------------------------------------------------------------------------------------------------------------------------------|
| Journal:                        | <i>BMJ Open</i>                                                                                                                                                                                                                                                                                                                                                                                                                                                                                                                                                                                                                                              |
| Manuscript ID                   | bmjopen-2021-052557.R2                                                                                                                                                                                                                                                                                                                                                                                                                                                                                                                                                                                                                                       |
| Article Type:                   | Original research                                                                                                                                                                                                                                                                                                                                                                                                                                                                                                                                                                                                                                            |
| Date Submitted by the Author:   | 02-Oct-2021                                                                                                                                                                                                                                                                                                                                                                                                                                                                                                                                                                                                                                                  |
| Complete List of Authors:       | Lee, Shuen Yee; Singapore Institute of Technology<br>Pang, Benedict Wei Jun; Geriatric Education and Research Institute Ltd<br>Lau, Lay Khoon; Geriatric Education and Research Institute Ltd<br>Jabbar, Khalid Abdul; Geriatric Education and Research Institute Ltd<br>Seah, Wei Ting; Geriatric Education and Research Institute Ltd<br>Chen, Kenneth Kexun; Geriatric Education and Research Institute Ltd<br>Ng, Tze Pin; National University of Singapore, Department of Psychological Medicine; Geriatric Education and Research Institute Ltd<br>Wee, Shiou-Liang; Singapore Institute of Technology; Geriatric Education and Research Institute Ltd |
| <b>Primary Subject Heading</b>: | Public health                                                                                                                                                                                                                                                                                                                                                                                                                                                                                                                                                                                                                                                |
| Secondary Subject Heading:      | Geriatric medicine, Health policy, Sports and exercise medicine                                                                                                                                                                                                                                                                                                                                                                                                                                                                                                                                                                                              |
| Keywords:                       | Health policy < HEALTH SERVICES ADMINISTRATION & MANAGEMENT, PREVENTIVE MEDICINE, Physiology < NATURAL SCIENCE DISCIPLINES, GERIATRIC MEDICINE, PUBLIC HEALTH, SPORTS MEDICINE                                                                                                                                                                                                                                                                                                                                                                                                                                                                               |
|                                 |                                                                                                                                                                                                                                                                                                                                                                                                                                                                                                                                                                                                                                                              |

SCHOLARONE™  
Manuscripts



I, the Submitting Author has the right to grant and does grant on behalf of all authors of the Work (as defined in the below author licence), an exclusive licence and/or a non-exclusive licence for contributions from authors who are: i) UK Crown employees; ii) where BMJ has agreed a CC-BY licence shall apply, and/or iii) in accordance with the terms applicable for US Federal Government officers or employees acting as part of their official duties; on a worldwide, perpetual, irrevocable, royalty-free basis to BMJ Publishing Group Ltd ("BMJ") its licensees and where the relevant Journal is co-owned by BMJ to the co-owners of the Journal, to publish the Work in this journal and any other BMJ products and to exploit all rights, as set out in our [licence](#).

The Submitting Author accepts and understands that any supply made under these terms is made by BMJ to the Submitting Author unless you are acting as an employee on behalf of your employer or a postgraduate student of an affiliated institution which is paying any applicable article publishing charge ("APC") for Open Access articles. Where the Submitting Author wishes to make the Work available on an Open Access basis (and intends to pay the relevant APC), the terms of reuse of such Open Access shall be governed by a Creative Commons licence – details of these licences and which [Creative Commons](#) licence will apply to this Work are set out in our licence referred to above.

Other than as permitted in any relevant BMJ Author's Self Archiving Policies, I confirm this Work has not been accepted for publication elsewhere, is not being considered for publication elsewhere and does not duplicate material already published. I confirm all authors consent to publication of this Work and authorise the granting of this licence.

1  
2  
3  
4 **Title: Cross-sectional associations of housework with cognitive, physical and**  
5  
6 **sensorimotor functions in younger and older community-dwelling adults – the**  
7  
8 **Yishun Study**  
9

10  
11  
12  
13 Shuen Yee Lee, PhD<sup>a</sup>, Benedict Wei Jun Pang, BSc<sup>b</sup>, Lay Khoon Lau, PhD<sup>b</sup>, Khalid  
14  
15 Abdul Jabbar, MSc<sup>b</sup>, Wei Ting Seah, MSc<sup>b</sup>, Kenneth Kexun Chen, BSc<sup>b</sup>, Tze Pin Ng,  
16  
17 MD<sup>b,c</sup>, Shiou-Liang Wee, PhD<sup>a,b</sup>  
18  
19

20  
21  
22  
23 <sup>a</sup>Health and Social Sciences Cluster, Singapore Institute of Technology, 10 Dover  
24  
25 Drive, Singapore 138683, Singapore, Singapore  
26

27 <sup>b</sup>Geriatric Education and Research Institute, 2 Yishun Central 2, Singapore 768024,  
28  
29 Singapore, Singapore  
30

31  
32 <sup>c</sup>Department of Psychological Medicine, National University of Singapore, 21 Lower  
33  
34 Kent Ridge Rd, Singapore 119077, Singapore, Singapore  
35  
36

37  
38  
39 **Corresponding author:** Shiou-Liang Wee, Geriatric Education and Research  
40  
41 Institute (GERI), 2 Yishun Central 2, Tower E Level 4 GERI Admin, 768024,  
42  
43 Singapore. Phone: +65 65924606, Email: [weeshiouliang@gmail.com](mailto:weeshiouliang@gmail.com)  
44  
45  
46  
47  
48  
49  
50  
51  
52  
53  
54  
55  
56  
57  
58  
59  
60

## Abstract

**Objectives:** Regular moderate-to-vigorous intensity recreational physical activity (PA) improves physical and cognitive functions. However, the age-associated relationships between non-recreational PA and functional ability remain less explored. We examined the associations between housework and functional health among younger and older Singaporean community-dwelling adults.

**Design:** Cross-sectional study

**Setting and Participants:** Younger (<65yrs,  $n=249$ ) and older ( $\geq 65$ yrs,  $n=240$ ) community-dwelling adults were randomly recruited from a large residential town in Singapore.

**Outcome measures:** Physical function was assessed using Short Physical Performance Battery, repeated-chair-sit-to-stand and gait speed. Cognitive and sensorimotor functions were assessed using Repeatable Battery for the Assessment of Neuropsychological Status (RBANS) and Physiological Profile Assessment (PPA) respectively.

**Methods:** Light (LH) and heavy housework (HH), recreational, occupational, and transport-related PA were assessed using PA questionnaires. Participants were dichotomised into low- and high-volume LH and HH groups. Results were adjusted for level of recreational and other non-recreational PA.

**Results:** Among older but not younger adults, RBANS scores were 8% and 5% higher in high HH and LH groups compared with low HH and LH groups respectively ( $p=0.012$  and  $p=0.016$ ). Specifically, HH was associated with 14% higher attention score ( $p=0.014$ ), and LH with 12% and 8% higher immediate and delayed memory scores respectively ( $p<0.001$  and  $p=0.004$ ). In older adults, sit-to-stand-time and PPA scores were 8% and 23% lower in high HH than low HH group respectively

1  
2  
3 (p=0.011 and p=0.040). SPPB and gait speed did not differ with age or HH. LH was  
4  
5 not associated with physical or sensorimotor function.  
6  
7

8 **Conclusions:** Among older adults, housework is associated with higher cognitive  
9  
10 function, specifically in attention and memory. Associations of housework with  
11  
12 physical function and sensorimotor performance were intensity-dependent.  
13

14 Housework PA is positively associated with functional health among community-  
15  
16 dwelling older adults, independent of recreation and other non-recreational physical  
17  
18 activities. Further longitudinal and intervention studies are needed to establish  
19  
20 causality.  
21  
22

23  
24  
25 **Key words:** Housework intensity, Functional health, High-income countries, Ageing,  
26  
27 Household chores, Non-recreational physical activity  
28  
29  
30  
31  
32  
33  
34  
35  
36  
37  
38  
39  
40  
41  
42  
43  
44  
45  
46  
47  
48  
49  
50  
51  
52  
53  
54  
55  
56  
57  
58  
59  
60

## Article Summary

### Strengths and limitations of this study

- Representative sample of Singapore's adult population across age groups
- Comprehensive information about housework, recreational, occupational and transport-related physical activities using validated measures
- Analyses included comparison between younger and older age groups and adjustments for potential confounders
- This study is cross-sectional; therefore, associations between housework and functional health do not necessarily reflect causality.
- Housework and physical activities were self-reported and not objectively measured.



## Introduction

Regular physical activity (PA) improves physical and mental health, mitigates the risks and effects of chronic diseases, and reduces falls, immobility, dependency and mortality among older adults<sup>1-3</sup>. Yet, global surveillance data indicate that in 2016, levels of insufficient PA remained high (27·5%) and stable across previous 10 years<sup>4</sup>. The prevalence of insufficient PA was also more than double in high-income countries than low-income countries (36·8% vs 16·2%), and was the highest in Singapore (36·5%), among high-income Asia Pacific countries<sup>4</sup>. In wealthier countries, transition towards more sedentary occupations and motorised transportation could explain the higher levels of inactivity. The majority of PA in high-income countries are from recreational PA, which differed from low-income countries where PA is predominantly from non-recreational activities, including transportation, occupational and housework<sup>4,5</sup>. Given the increasing prevalence of insufficient PA globally<sup>5</sup>, better strategies and policies are required to increase PA levels, especially among older adults, due to their increased vulnerability to adverse health outcomes<sup>6</sup>.

Earlier studies in high-income countries largely focused on the effects of recreational PA on physical and cognitive capacities, which are key risk factors for falls among older adults<sup>7-9</sup>. Few studies have examined the independent effects of non-recreational activity, such as housework tasks, on age-associated decline in functional ability<sup>10-12</sup>. Furthermore, although the effects of exercise intensity have been widely investigated<sup>1</sup>, none of the studies investigated the associations between housework intensity and age-associated functional health. With the rapidly ageing population and increasing life expectancy worldwide, approaches to promote

1  
2  
3 healthy ageing, which centres upon the maintenance of functional ability, are  
4 urgently needed <sup>13</sup>.  
5  
6  
7  
8  
9

10 Housework activities are a large part of everyday activities in older people, and  
11 account for a significant proportion of self-reported PA <sup>14</sup>. Apart from a meaningful  
12 occupation, housework is also a component of instrumental activities of daily living –  
13 both key factors of successful ageing. Additionally, single bout of housework and  
14 chronic housework are associated with improved cognition, brain volume and  
15 executive function, and negatively associated with frailty <sup>10-12</sup>. Regardless of country  
16 income levels, higher levels of non-recreational PA were associated with a graded  
17 reduction in mortality and cardiovascular diseases, suggesting the potential role of  
18 non-recreational PA such as housework, on improving health outcomes even in high-  
19 income countries <sup>5</sup>. Housework may also confer benefits on physical and mental  
20 functions among older adults in a high-income country such as Singapore.  
21  
22  
23  
24  
25  
26  
27  
28  
29  
30  
31  
32  
33

34  
35 Therefore, we studied the associations of light and heavy housework activities with  
36 cognitive, physical and sensorimotor functions, among younger and older adults in  
37 Singapore.  
38  
39  
40  
41  
42  
43  
44  
45  
46  
47

## 48 **Methods**

### 49 Settings

50 Community-dwelling adults ( $\geq 21$  years) were recruited from a large north-eastern  
51 residential town of Yishun in Singapore, with residential population of 220,320  
52 (50.6% females), with 12.2% older adults ( $\geq 65$  years). This is similar to the overall  
53 Singapore residential population of 4,044,200 (51.1% females), with 15.2% older  
54 adults ( $\geq 65$  years) <sup>15</sup>.  
55  
56  
57  
58  
59  
60

## Participants

Participants were recruited cross-sectionally from the Yishun Study through random sampling, in quotas of 20 to 40 participants in each sex and age group (10-year age groups between 21–60 years old and 5-year age groups after 60 years), to obtain a representative sample of ~300 men and ~300 women<sup>16</sup>. Briefly, community-dwelling adults aged 21 years and above who were independent in performing activities of daily living, had <5 comorbidities, and no neuromuscular or cognitive disorders were recruited. Those between 21–64 years and 65–90 years in age were categorized as younger and older participants respectively. Participants self-reported their years of education and medical conditions and comorbidities. All assessments were based on standardized protocols and administered by trained researchers at the Geriatric Education & Research Institute Lab on Yishun Health Campus, mostly within one visit. Ethics approval was obtained from the National Healthcare Group DSRB (2017/00212), in accordance with the relevant guidelines from the Declaration of Helsinki and the ethical principles in the Belmont Report. All participants gave written informed consent.

## Patient and public involvement

Neither patients nor the public were involved in the design, planning, conduct or reporting of this study.

### Anthropometric assessment

Body weight and height were measured using an electronic scale and stadiometer respectively (SECA, Hamburg, Germany). Body mass index was calculated as body weight (kg) divided by height (m) squared.

### Housework, recreational, transport and occupational PA

Data on housework were self-reported and collected according to the Longitudinal Ageing Study Amsterdam PA questionnaire (LAPAQ) <sup>17</sup>, which consists of specific questions regarding frequency and time spent on light and heavy household tasks. Light housework tasks (LH) included washing the dishes, dusting, making the bed, doing the laundry, hanging out the laundry, ironing, tidying up, and cooking meals. Heavy housework tasks (HH) included window cleaning, changing beddings, beating the mat, vacuuming, washing or scrubbing the floor, and chores involving sawing, carpeting, repairing or painting. The median time spent per week on household activities was used to dichotomize participants into high and low groups for LH (315 min/week) and HH (15 min/week) groups. Light housework was assigned a metabolic equivalent of task (MET) of 2·5 and heavy housework was assigned a MET of 4·0 <sup>18</sup>.

Recreational (sport, fitness or leisure time activities), transport (active commuting/travel) and occupational (work) PA were determined using the Global Physical Activity Questionnaire (GPAQ), which consists of questions assessing the frequency and duration of vigorous- or moderate-intensity activities during a typical week <sup>19</sup>. A cut-off of  $\geq 600$  MET min/week ( $\geq 150$  min/week of moderate-intensity PA

1  
2  
3 or  $\geq 75$  min/week of vigorous-intensity PA) was used to determine percentage of  
4  
5 participants who met the current PA guidelines <sup>5,20</sup>.  
6  
7

### 8 9 10 Cognitive function

11  
12 Cognitive performance was assessed by the Repeatable Battery for the Assessment  
13 of Neuropsychological Status (RBANS) score. RBANS is a standardized age-  
14 adjusted battery that is sensitive to cognitive impairment <sup>21</sup>. RBANS assesses global  
15 and specific cognitive domains including immediate and delayed memory,  
16  
17 visuospatial-construction, language, and attention.  
18  
19  
20  
21  
22  
23  
24  
25

### 26 Physical function

27  
28 Habitual gait speed was assessed using a 6m GAITRite Walkway (CIR Systems Inc,  
29 Sparta, NJ) with 2m lead in and out phase. Participants performed three trials and  
30 the average timing was recorded. The Short Physical Performance Battery (SPPB)  
31 consists of 3 subtests including balance, gait and sit-to-stand <sup>22,23</sup>. The balance  
32 subtest composed of 3 parts with progressive difficulty, including unaided feet-  
33 together stand, semi-tandem stand and full-tandem stand. Participants were timed  
34 until they moved or 10s elapsed time. Gait speed was assessed by participants  
35 walking 8ft at their usual pace, with a moving start <sup>22</sup>. The average timing was  
36 recorded over two trials. To assess sit-to-stand time, participants folded their arms  
37 across their chest and performed five chair stands as quickly as possible. Each of  
38 the 3 subtests was scored from 0–4 and the total score was the sum of 3 subtests,  
39 ranging from 0–12. Higher SPPB scores indicated better physical function <sup>22</sup>.  
40  
41  
42  
43  
44  
45  
46  
47  
48  
49  
50  
51  
52  
53  
54  
55  
56  
57  
58  
59  
60

### Sensorimotor or Physiological falls risk assessments

Physiological falls risk was determined using the physiological profile assessment (PPA) short version, which has been shown to predict fall incidents and consists of five validated sensorimotor measures: visual contrast sensitivity, hand reaction time, knee extension strength, proprioception and postural sway<sup>24,25</sup>. The five measures were weighted to compute a composite PPA index score using the NeuRA FallScreen® Falls Risk Calculator (<https://fbirc.neura.edu.au/fallscreen>). Higher PPA scores indicates poorer sensorimotor performance and greater falls risk<sup>24,25</sup>.

### Statistical analysis

All statistical analyses were performed using R version 3.6.2 (R Foundation for statistical computing, Vienna, Austria). A sample size of 400 (100 per group) was needed for the trial to have 80% power to detect a two-sided hypothesis test at an  $\alpha$  level of 0.05 (effect size of 0.2) (G\*Power, version 3.1, Germany). All participants with completed outcome measures were included for analysis. Numerical variables are presented as mean (standard deviation, SD) in text and figures unless otherwise stated. Participant characteristics were analyzed using independent samples t-test to assess potential differences between high and low HH and LH groups.

Sensorimotor, cognitive and physical function measures were analyzed using two-way analysis of variance (ANOVA) for HH and LH independently, with age group (younger vs older), housework groups (low vs high), and their interaction (age\*housework) as fixed effects. Normality and homogeneity of variances assumptions were tested using Shapiro-Wilk and Levene's test respectively. Effect sizes are reported with partial eta squared ( $\eta^2_p$ )<sup>26</sup>. A value of  $p < 0.05$  was considered statistically significant.

## Results

### Participant characteristics

A total of 249 participants (57% women) with mean age of 44 years (SD 14 years) in the younger group, and 240 participants (57.1% women) with mean age of 75 years (SD 6 years) in the older group, had housework (LAPAQ) data available and were included in the analysis. Ethnic distribution of participants (82.0% Chinese, 8.4% Malay, 6.7% Indians, and 2.9% from other ethnicities) was similar to that of Singapore's population<sup>15</sup>. A total of 36% ( $n=90$ ) and 48% ( $n=116$ ) of the participants in the younger and older group respectively, met the recommended PA level derived exclusively from recreational PA<sup>20</sup>. These values were lower than 61% ( $n=152$ ) and 66% ( $n=159$ ) of the younger and older participants respectively, who attained the recommended PA level exclusively through housework activities.

Participant demographics between high and low HH and LH groups, such as age, education, anthropometric, PA and housework data, are summarised in Table 1. Compared with low HH and LH groups, majority of participants in high HH and LH groups were women, regardless of age groups. Within the younger group, high LH group were shorter and had less years of education than low LH group (all  $p<0.001$ , Table 1). Total, recreational and occupational PA did not differ between high and low HH and LH groups in younger and older adults (all  $p>0.05$ , Table 1). Within the younger but not the older group, transport-related PA was 39% lower in low LH than high LH group ( $p=0.003$ , Table 1). Regardless of age group, compared with low HH and LH groups, participants in the high HH and LH groups spent more time on both

1  
2  
3 light and heavy housework activities per week and had higher total housework MET  
4  
5 min/week (all  $p < 0.001$ , Table 1).  
6  
7  
8  
9

10 For subsequent light housework analyses, age, sex, height, education, transport PA  
11 and heavy housework were included in the model to adjust for confounding  
12 variables. To adjust for confounding factors, age, sex and light housework were  
13 included in model for subsequent heavy housework analyses. Adjusting for  
14 recreational and occupational PA in the analyses did not affect any of the results  
15 presented; hence, data are presented with recreational and occupational PA  
16 excluded from the model.  
17  
18  
19  
20  
21  
22  
23  
24  
25  
26  
27

### 28 Associations of heavy housework activities with cognitive function

29  
30 Within the older group, RBANS global cognition score was 8% higher in the high HH  
31 than low HH group ( $p = 0.012$ ) but did not differ between high and low HH groups  
32 among the younger individuals ( $p = 0.630$ ) (age\*housework;  $p = 0.031$ ,  $\eta^2_p = 0.01$ , Fig  
33 1a). Immediate memory index scores between high and low HH groups were not  
34 statistically significant among older ( $p = 0.055$ ) and younger adults ( $p = 0.332$ ), despite  
35 significant interaction effects (age\*housework;  $p = 0.038$ ,  $\eta^2_p = 0.009$ , Fig 1b). No  
36 significant interaction effects between age and HH groups were observed for  
37 delayed memory ( $p = 0.108$ ,  $\eta^2_p = 0.005$ ), visuospatial-construction ( $p = 0.183$ ,  
38  $\eta^2_p = 0.004$ ), and language index scores ( $p = 0.776$ ,  $\eta^2_p = 0.0002$ ) (Fig 1c-e). Attention  
39 index score was 14% higher in the high HH than low HH group within the older  
40 ( $p = 0.014$ ) but not the younger ( $p = 0.304$ ) group (age\*housework;  $p = 0.012$ ,  $\eta^2_p = 0.01$ ,  
41 Fig 1f).  
42  
43  
44  
45  
46  
47  
48  
49  
50  
51  
52  
53  
54  
55  
56  
57  
58  
59  
60



### Associations of light housework activities with cognitive function

Compared with low LH group, high LH group had 5% higher RBANS global cognition score among the older but not the younger adults ( $p=0.016$  vs  $p=0.335$ ) (age\*housework;  $p=0.015$ ,  $\eta^2_p=0.01$ , Fig 2a). Within the older but not the younger individuals, immediate and delayed memory index scores were also 12% ( $p<0.001$  vs  $p=0.165$ ) and 8% ( $p=0.004$  vs  $p=0.729$ ) higher in high LH than low LH group respectively (age\*housework;  $p<0.001$ ,  $\eta^2_p=0.03$  and  $p=0.022$ ,  $\eta^2_p=0.01$ )(Fig 2b&c). No significant interaction effects between age and LH groups were observed for visuospatial-construction ( $p=0.781$ ,  $\eta^2_p=0.0002$ ), language ( $p=0.318$ ,  $\eta^2_p=0.002$ ) and attention ( $p=0.194$ ,  $\eta^2_p=0.004$ ) index scores (Fig 2d–f).

### Associations of heavy housework activities with physical and sensorimotor functions

The interaction effects between age and HH groups were not significant for total SPPB score ( $p=0.155$ ,  $\eta^2_p=0.004$ , Fig 3a) and gait speed ( $p=0.482$ ,  $\eta^2_p=0.001$ , Fig 3b). Within the older but not the younger group, sit-to-stand time was 8% lower in the high HH than low HH group ( $p=0.011$  vs  $p=0.722$ ) (age\*housework;  $p=0.036$ ,  $\eta^2_p=0.009$ , Fig 3c). PPA index score, indicative of sensorimotor function, was 23% lower in the high HH than low HH group, among the older ( $p=0.040$ ) but not the younger adults ( $p=0.477$ ) (age\*housework;  $p=0.046$ ,  $\eta^2_p=0.008$ , Fig 3d).

### Associations of light housework activities with physical and sensorimotor functions

The interaction effects between age and LH groups were not significant for total SPPB score ( $p=0.709$ ,  $\eta^2_p=0.0003$ ), gait speed ( $p=0.136$ ,  $\eta^2_p=0.005$ ), sit-to-stand ( $p=0.445$ ,  $\eta^2_p=0.001$ ) (Fig 4a–c). PPA index scores, indicative of sensorimotor function, were not significant between high and low LH groups among older

1  
2  
3 ( $p=0.067$ ) and younger adults ( $p=0.178$ ), despite significant interaction effects  
4  
5 ( $\text{age} \times \text{housework}; p=0.021, \eta^2_p=0.01$ , Fig 4d). Mean (SD) values of cognitive, physical  
6  
7 and sensorimotor performances between age and housework groups are presented  
8  
9 in Supplementary Table S1.  
10  
11  
12  
13  
14

## 15 Discussion

16  
17 The present study is the first to report that housework activity is associated with  
18  
19 cognitive, physical and sensorimotor functions among older but not younger adults in  
20  
21 Singapore. These positive associations of housework with functional performance in  
22  
23 older adults were independent of recreational, occupational and transport-related  
24  
25 physical activities. We also show that more adults attained recommended physical  
26  
27 activity levels through housework than recreation.  
28  
29  
30  
31

32  
33  
34 Regardless of intensity, higher levels of housework activities were associated with  
35  
36 higher global cognition, among our population of older adults. Earlier studies  
37  
38 observed that lower levels of housework activities were associated with mild  
39  
40 cognitive impairment, cognitive decline and lower grey matter volume among older  
41  
42 adults<sup>11,27,28</sup>, suggesting a positive association between housework activities and  
43  
44 cognitive function, plausibly through an increase in brain volume, as observed with  
45  
46 exercise interventions in older adults<sup>29,30</sup>. However, the positive associations  
47  
48 between housework and cognition were not apparent in younger adults in our  
49  
50 population. Differences in years of education between younger and older adults likely  
51  
52 explain the disparity, as younger adults in this study had five more years of  
53  
54 education on average than older adults. Since education level is positively  
55  
56 associated with baseline cognitive function and slower cognitive decline<sup>31</sup>, it is  
57  
58  
59  
60

1  
2  
3 plausible that higher education levels and cognitive function in younger adults  
4  
5 decreases the potential for better cognitive function associated with housework  
6  
7  
8 activities.  
9

10  
11  
12 Our results demonstrate, for the first time, that the intensity of housework was  
13  
14 differentially associated with specific cognitive domains. Heavy housework was  
15  
16 associated with higher scores in the attention domain, while light housework was  
17  
18 associated with higher scores in both delayed and immediate memory domains in  
19  
20 older adults. Earlier studies reported that aerobic exercise interventions of varying  
21  
22 intensities improved specific cognitive function domains, including executive and  
23  
24 motor function, attention and memory, through an increase in hippocampal volume  
25  
26 and brain-derived neurotrophic factor expression <sup>32-34</sup>. Given that housework  
27  
28 accounted for a significant proportion (~24–36% in women and ~19–28% in men) of  
29  
30 self-reported moderate-to-vigorous-intensity PA among older adults aged above 60  
31  
32 <sup>14</sup>, it is plausible that the higher cognitive function associated with housework occurs  
33  
34 through a similar mechanism as PA or exercise <sup>14</sup>. More studies are required to  
35  
36 understand the underlying mechanisms driving the age-associated differing  
37  
38 associations of housework intensity with specific cognitive domains.  
39  
40  
41  
42  
43  
44  
45  
46

47 Poorer cognitive performance in attention and executive functions were associated  
48  
49 with poorer physical function, slower gait, postural instability, and future falls among  
50  
51 community-dwelling older adults <sup>35-37</sup>. We show that higher levels of heavy  
52  
53 housework activities were also independently associated with better physical  
54  
55 function (chair-stand time) and sensorimotor (PPA) performance in older but not  
56  
57 younger adults. Among older Swedish adults, longer chair-stand time and poorer  
58  
59  
60

1  
2  
3 cognitive performance (processing speed and executive function) independently  
4 increased the risk of injurious falls over 3–10 years by 10–23%<sup>38</sup>. Unlike older adults,  
5  
6 younger adults have higher functional abilities and are unlikely to experience decline  
7  
8 in sensorimotor and physical functions, potentially explaining the lack of associations  
9  
10 between housework activities and physical and sensorimotor performances. These  
11  
12 results collectively suggest that the higher cognitive, physical and sensorimotor  
13  
14 functions related to heavy housework activities might plausibly be associated with  
15  
16 lower physiological fall risk among community-dwelling older adults.  
17  
18  
19  
20  
21  
22  
23

24 We demonstrated that unlike heavy housework, light housework was not associated  
25  
26 with physical or sensorimotor function. The lack of associations could be due to the  
27  
28 already high functional ability of our study participants <sup>23</sup>. In support, compared with  
29  
30 lower intensity exercise, greater improvements in functional ability and decreased  
31  
32 fear of falling were observed after high intensity exercise in older adults <sup>39-41</sup>. These  
33  
34 results indicate a dose-response effect for exercise intensity on physical and  
35  
36 sensorimotor functions and associated falls risk in older adults. Similarly, we propose  
37  
38 that the positive associations of housework with physical and sensorimotor functions  
39  
40 are dependent on intensity, especially in community-dwelling older adults.  
41  
42  
43  
44  
45  
46

47 Notably in this present study, 25% and 18% more participants in the younger and  
48  
49 older group, respectively, met the PA guidelines derived exclusively from housework,  
50  
51 than that attained solely through recreational PA. This finding reflects the challenges  
52  
53 inherent with recreational PA participation, which is by definition, done during  
54  
55 discretionary hours of the day outside of occupational and domestic duties.  
56  
57

58 Incorporating PA into daily lifestyle through domestic duties (i.e., housework) has the  
59  
60

1  
2  
3 potential to achieve higher PA, which is positively associated with functional health  
4  
5 especially among older community-dwelling adults.  
6  
7  
8  
9

10 Our study recruited adults aged 21–80+ randomly from a large residential town  
11  
12 representative of Singapore's population, suggesting a good degree of  
13  
14 generalisability. We also included a comparison between older and younger adults in  
15  
16 the study, to elucidate the age-associated effects of housework activities on  
17  
18 cognitive, physical and sensorimotor functions. However, although associations can  
19  
20 be drawn from the study results, the cross-sectional design does not prove causality.  
21  
22 It is plausible that healthier older adults with higher functional ability engaged in  
23  
24 higher levels of housework. Nonetheless, in a 13-year follow-up study, productive  
25  
26 housework activities such as cooking and shopping were associated with lower  
27  
28 mortality risk in older adults <sup>42</sup>, suggesting that housework activities are associated  
29  
30 with better health outcomes in older adults. Another potential limitation included the  
31  
32 lack of patient or public involvement in the design, planning, conduct or reporting of  
33  
34 the study. The study findings in community-dwelling individuals cannot be  
35  
36 generalised to institutionalised older adults, such as those in nursing homes. In the  
37  
38 present study, housework and PA measures were self-reported based on type,  
39  
40 intensity, frequency and duration per week. Although the LAPAQ and GPAQ used in  
41  
42 this study is valid and reliable <sup>17,19</sup>, future studies using more objective measures of  
43  
44 housework and PA should be undertaken. It is possible that socio-economic status  
45  
46 may mediate the effects of housework on health <sup>43</sup>, which should be further  
47  
48 examined in the Asian cultural context. While we adjusted for sex in all analyses,  
49  
50 compared with low housework groups, participants in high housework groups were  
51  
52 mostly women, which is consistent with earlier studies showing greater involvement  
53  
54  
55  
56  
57  
58  
59  
60

1  
2  
3 in household chores among women than men <sup>44</sup>. Future studies should investigate  
4 the sex-specific effects of housework on functional health.  
5  
6  
7  
8  
9

10 In conclusion, our study suggests that a combination of light and heavy housework is  
11 associated with higher cognitive function, specifically in attention and memory  
12 domains, among community-dwelling older adults. Furthermore, the positive  
13 associations of housework levels with physical and sensorimotor functions in older  
14 adults were intensity-dependent. Housework may also complement recreational  
15 physical activities among current older community-dwelling adults in high-income  
16 countries towards healthier ageing. Future longitudinal and intervention studies are  
17 required to establish causality between housework activities and functional health.  
18  
19  
20  
21  
22  
23  
24  
25  
26  
27  
28  
29  
30  
31

### 32 **Funding**

33  
34 This work was supported by Geriatric Education and Research Institute (GERI)  
35 intramural funding grant number [GERI 1609].  
36  
37  
38  
39  
40  
41

### 42 **Acknowledgements**

43  
44 The authors gratefully acknowledge the strong support of Prof. Pang Weng Sun in  
45 making this Yishun Study possible, and the support of Daniella Ng, Queenie Tan, Dr.  
46 Lilian Chye, Sylvia Ngu Siew Ching, Aizuriah Mohamed Ali, Mary Ng Pei Ern, Chua  
47 Xing Ying and Shermaine Thein in this study.  
48  
49  
50  
51  
52  
53  
54  
55  
56  
57  
58  
59  
60

## Contributions

SYL performed the data analysis, interpretation, visualisation and wrote the manuscript. SLW, TPN, BWJP and LKL contributed to the study concept and design. BWJP, LKL, KAJ, WTS, KKC administered the project and collected the data. BWJP, LKL accessed and verified the underlying data. SLW, TPN contributed to the critical revision of the manuscript for important intellectual content. All authors read and approved the final manuscript.

## Declaration of Interest

None declared.

## Data sharing statement

The datasets used and/or analysed during the current study are available from the corresponding author on reasonable request.

## Ethics Approval Statement

This study involves human participants and was approved by an Ethics Committee(s) or Institutional Board(s) - [National Healthcare Group DSRB (2017/00212)].

## References

1. McPhee JS, French DP, Jackson D, Nazroo J, Pendleton N, Degens H. Physical activity in older age: perspectives for healthy ageing and frailty. *Biogerontology* 2016; **17**(3): 567-80.
2. Geidl W, Schlesinger S, Mino E, Miranda L, Pfeifer K. Dose-response relationship between physical activity and mortality in adults with noncommunicable diseases: a systematic review and meta-analysis of prospective observational studies. *Int J Behav Nutr Phys Act* 2020; **17**(1): 109.
3. Sherrington C, Fairhall N, Kwok W, et al. Evidence on physical activity and falls prevention for people aged 65+ years: systematic review to inform the WHO guidelines on physical activity and sedentary behaviour. *Int J Behav Nutr Phys Act* 2020; **17**(1): 144.
4. Guthold R, Stevens GA, Riley LM, Bull FC. Worldwide trends in insufficient physical activity from 2001 to 2016: a pooled analysis of 358 population-based surveys with 1&#xb7;9 million participants. *The Lancet Global Health* 2018; **6**(10): e1077-e86.
5. Lear SA, Hu W, Rangarajan S, et al. The effect of physical activity on mortality and cardiovascular disease in 130 000 people from 17 high-income, middle-income, and low-income countries: the PURE study. *Lancet* 2017; **390**(10113): 2643-54.
6. Cunningham C, R OS, Caserotti P, Tully MA. Consequences of physical inactivity in older adults: A systematic review of reviews and meta-analyses. *Scand J Med Sci Sports* 2020; **30**(5): 816-27.
7. Sherrington C, Michaleff ZA, Fairhall N, et al. Exercise to prevent falls in older adults: an updated systematic review and meta-analysis. *Br J Sports Med* 2017; **51**(24): 1750-8.



- 1  
2  
3 8. Lam FM, Huang MZ, Liao LR, Chung RC, Kwok TC, Pang MY. Physical  
4 exercise improves strength, balance, mobility, and endurance in people with  
5 cognitive impairment and dementia: a systematic review. *J Physiother* 2018; **64**(1):  
6 4-15.  
7
- 8  
9  
10  
11  
12 9. García-Hermoso A, Ramirez-Vélez R, Sáez de Asteasu ML, et al. Safety and  
13 Effectiveness of Long-Term Exercise Interventions in Older Adults: A Systematic  
14 Review and Meta-analysis of Randomized Controlled Trials. *Sports Med* 2020; **50**(6):  
15 1095-106.  
16
- 17  
18  
19  
20  
21 10. Stephan AJ, Strobl R, Müller M, et al. A high level of household physical  
22 activity compensates for lack of leisure time physical activity with regard to deficit  
23 accumulation: Results from the KORA-Age study. *Prev Med* 2016; **86**: 64-9.  
24
- 25  
26  
27  
28  
29 11. Koblinsky ND, Meusel L-AC, Greenwood CE, Anderson ND. Household  
30 physical activity is positively associated with gray matter volume in older adults. *BMC*  
31 *Geriatrics* 2021; **21**(1): 104.  
32
- 33  
34  
35  
36  
37 12. Tsuchiya K, Mitsui S, Fukuyama R, et al. An acute bout of housework  
38 activities has beneficial effects on executive function. *Neuropsychiatr Dis Treat* 2018;  
39 **14**: 61-72.  
40
- 41  
42  
43  
44  
45 13. Beard JR, Officer A, de Carvalho IA, et al. The World report on ageing and  
46 health: a policy framework for healthy ageing. *Lancet* 2016; **387**(10033): 2145-54.  
47
- 48  
49  
50  
51  
52 14. Murphy MH, Donnelly P, Breslin G, Shibli S, Nevill AM. Does doing  
53 housework keep you healthy? The contribution of domestic physical activity to  
54 meeting current recommendations for health. *BMC Public Health* 2013; **13**: 966.  
55
- 56  
57  
58  
59 15. Department of Statistics Singapore. Population and Population Structure.  
60 2020. [https://www.singstat.gov.sg/find-data/search-by-theme/population/population-  
and-population-structure/latest-data](https://www.singstat.gov.sg/find-data/search-by-theme/population/population-and-population-structure/latest-data) (accessed 25 March 2021 2021).

16. Pang BWJ, Wee SL, Lau LK, et al. Prevalence and Associated Factors of Sarcopenia in Singaporean Adults-The Yishun Study. *J Am Med Dir Assoc* 2020.
17. Stel VS, Smit JH, Pluijm SM, Visser M, Deeg DJ, Lips P. Comparison of the LASA Physical Activity Questionnaire with a 7-day diary and pedometer. *J Clin Epidemiol* 2004; **57**(3): 252-8.
18. Siebeling L, Wiebers S, Beem L, Puhan MA, Ter Riet G. Validity and reproducibility of a physical activity questionnaire for older adults: questionnaire versus accelerometer for assessing physical activity in older adults. *Clin Epidemiol* 2012; **4**: 171-80.
19. Bull FC, Maslin TS, Armstrong T. Global physical activity questionnaire (GPAQ): nine country reliability and validity study. *J Phys Act Health* 2009; **6**(6): 790-804.
20. Haskell WL, Lee IM, Pate RR, et al. Physical activity and public health: updated recommendation for adults from the American College of Sports Medicine and the American Heart Association. *Med Sci Sports Exerc* 2007; **39**(8): 1423-34.
21. Randolph C, Tierney MC, Mohr E, Chase TN. The Repeatable Battery for the Assessment of Neuropsychological Status (RBANS): preliminary clinical validity. *J Clin Exp Neuropsychol* 1998; **20**(3): 310-9.
22. Guralnik JM, Ferrucci L, Simonsick EM, Salive ME, Wallace RB. Lower-extremity function in persons over the age of 70 years as a predictor of subsequent disability. *N Engl J Med* 1995; **332**(9): 556-61.
23. Lee SY, Choo PL, Pang BWJ, et al. SPPB reference values and performance in assessing sarcopenia in community-dwelling Singaporeans – Yishun study. *BMC Geriatrics* 2021; **21**(1): 213.

- 1  
2  
3 24. Lord SR, Ward JA, Williams P, Anstey KJ. Physiological factors associated  
4 with falls in older community-dwelling women. *J Am Geriatr Soc* 1994; **42**(10): 1110-  
5  
6  
7  
8 7.
- 9  
10 25. Lord SR, Menz HB, Tiedemann A. A Physiological Profile Approach to Falls  
11 Risk Assessment and Prevention. *Physical Therapy* 2003; **83**(3): 237-52.
- 12  
13 26. Lakens D. Calculating and reporting effect sizes to facilitate cumulative  
14 science: a practical primer for t-tests and ANOVAs. *Front Psychol* 2013; **4**: 863.
- 15  
16 27. Jiang C, Xu Y. The association between mild cognitive impairment and doing  
17 housework. *Aging Ment Health* 2014; **18**(2): 212-6.
- 18  
19 28. Peng Z, Jiang H, Wang X, et al. The Efficacy of Cognitive Training for Elderly  
20 Chinese Individuals with Mild Cognitive Impairment. *Biomed Res Int* 2019; **2019**:  
21  
22 4347281.
- 23  
24 29. Colcombe SJ, Erickson KI, Scalf PE, et al. Aerobic Exercise Training  
25 Increases Brain Volume in Aging Humans. *The Journals of Gerontology: Series A*  
26 2006; **61**(11): 1166-70.
- 27  
28 30. Erickson KI, Leckie RL, Weinstein AM. Physical activity, fitness, and gray  
29 matter volume. *Neurobiology of Aging* 2014; **35**: S20-S8.
- 30  
31 31. Clouston SAP, Smith DM, Mukherjee S, et al. Education and Cognitive  
32 Decline: An Integrative Analysis of Global Longitudinal Studies of Cognitive Aging.  
33  
34 *The Journals of Gerontology: Series B* 2020; **75**(7): e151-e60.
- 35  
36 32. Angevaren M, Aufdemkampe G, Verhaar HJ, Aleman A, Vanhees L. Physical  
37 activity and enhanced fitness to improve cognitive function in older people without  
38 known cognitive impairment. *Cochrane Database Syst Rev* 2008; (3): Cd005381.
- 39  
40 33. Gomez-Pinilla F, Hillman C. The influence of exercise on cognitive abilities.  
41  
42  
43  
44  
45  
46  
47  
48  
49  
50  
51  
52  
53  
54  
55  
56  
57  
58  
59  
60  
*Compr Physiol* 2013; **3**(1): 403-28.

- 1  
2  
3 34. Smith PJ, Blumenthal JA, Hoffman BM, et al. Aerobic exercise and  
4 neurocognitive performance: a meta-analytic review of randomized controlled trials.  
5  
6 *Psychosom Med* 2010; **72**(3): 239-52.  
7  
8  
9  
10 35. Tabbarah M, Crimmins EM, Seeman TE. The Relationship Between Cognitive  
11 and Physical Performance: MacArthur Studies of Successful Aging. *The Journals of*  
12 *Gerontology: Series A* 2002; **57**(4): M228-M35.  
13  
14  
15  
16 36. Montero-Odasso M, Speechley M. Falls in Cognitively Impaired Older Adults:  
17 Implications for Risk Assessment And Prevention. *J Am Geriatr Soc* 2018; **66**(2):  
18 367-75.  
19  
20  
21  
22  
23 37. Muir SW, Gopaul K, Montero Odasso MM. The role of cognitive impairment in  
24 fall risk among older adults: a systematic review and meta-analysis. *Age and Ageing*  
25 2012; **41**(3): 299-308.  
26  
27  
28  
29 38. Welmer A-K, Rizzuto D, Laukka EJ, Johnell K, Fratiglioni L. Cognitive and  
30 Physical Function in Relation to the Risk of Injurious Falls in Older Adults: A  
31 Population-Based Study. *The Journals of Gerontology: Series A* 2017; **72**(5): 669-75.  
32  
33  
34  
35 39. Sanders LMJ, Hortobágyi T, Karssemeijer EGA, Van der Zee EA, Scherder  
36 EJA, van Heuvelen MJG. Effects of low- and high-intensity physical exercise on  
37 physical and cognitive function in older persons with dementia: a randomized  
38 controlled trial. *Alzheimers Res Ther* 2020; **12**(1): 28.  
39  
40  
41  
42  
43 40. Jiménez-García JD, Hita-Contreras F, de la Torre-Cruz M, et al. Risk of Falls  
44 in Healthy Older Adults: Benefits of High-Intensity Interval Training Using Lower  
45 Body Suspension Exercises. *J Aging Phys Act* 2019; **27**(3): 325-33.  
46  
47  
48  
49 41. Edholm P, Nilsson A, Kadi F. Physical function in older adults: Impacts of past  
50 and present physical activity behaviors. *Scand J Med Sci Sports* 2019; **29**(3): 415-  
51 21.  
52  
53  
54  
55  
56  
57  
58  
59  
60

- 1  
2  
3 42. Glass TA, de Leon CM, Marottoli RA, Berkman LF. Population based study of  
4 social and productive activities as predictors of survival among elderly Americans.  
5  
6  
7 *Bmj* 1999; **319**(7208): 478-83.  
8  
9  
10 43. Rodriguez-Stanley J, Alonso-Ferres M, Zilioli S, Slatcher RB. Housework,  
11 health, and well-being in older adults: The role of socioeconomic status. *J Fam*  
12  
13  
14 *Psychol* 2020; **34**(5): 610-20.  
15  
16  
17 44. Bianchi SM, Sayer LC, Milkie MA, Robinson JP. Housework: Who Did, Does  
18 or Will Do It, and How Much Does It Matter? *Soc Forces* 2012; **91**(1): 55-63.  
19  
20  
21  
22  
23  
24  
25  
26  
27  
28  
29  
30  
31  
32  
33  
34  
35  
36  
37  
38  
39  
40  
41  
42  
43  
44  
45  
46  
47  
48  
49  
50  
51  
52  
53  
54  
55  
56  
57  
58  
59  
60

**Table 1.** Mean (SD) Participant characteristics for high and low heavy housework and light housework groups, within younger and older groups.

|                                    | Heavy Housework (HH) |             |                  | Light Housework (LH) |             |                  |
|------------------------------------|----------------------|-------------|------------------|----------------------|-------------|------------------|
|                                    | Low                  | High        | <i>p</i> value   | Low                  | High        | <i>p</i> value   |
| <b>Younger</b>                     |                      |             |                  |                      |             |                  |
| <i>n</i>                           | 100                  | 149         |                  | 137                  | 112         |                  |
| Sex, Female (n (%))                | 48 (48)              | 94 (63)     |                  | 62 (45)              | 80 (71)     |                  |
| Age (years)                        | 43 (15)              | 44 (13)     | 0.516            | 42 (14)              | 46 (13)     | <b>0.015</b>     |
| Education (Years)                  | 12 (4)               | 12 (4)      | 0.493            | 13 (4)               | 11 (4)      | <b>&lt;0.001</b> |
| Height (m)                         | 1.64 (0.09)          | 1.62 (0.08) | 0.115            | 1.65 (0.08)          | 1.60 (0.08) | <b>&lt;0.001</b> |
| Weight (kg)                        | 68.0 (15.2)          | 67.7 (17.3) | 0.875            | 69.0 (17.2)          | 66.4 (15.5) | 0.219            |
| Body Mass Index                    | 25.2 (4.8)           | 25.6 (5.6)  | 0.557            | 25.1 (5.4)           | 25.8 (5.2)  | 0.324            |
| Physical Activity (GPAQ)           |                      |             |                  |                      |             |                  |
| <i>Recreational (MET min/week)</i> | 576 (784)            | 774 (1302)  | 0.137            | 637 (933)            | 764 (1324)  | 0.393            |
| <i>Transport (MET min/week)</i>    | 2065 (3010)          | 2003 (2228) | 0.861            | 1577 (1955)          | 2579 (3075) | <b>0.003</b>     |
| <i>Occupational (MET min/week)</i> | 1686 (3619)          | 2408 (5658) | 0.220            | 2052 (4252)          | 2199 (5699) | 0.821            |
| <i>Total (MET min/week)</i>        | 4327 (5151)          | 5185 (6903) | 0.263            | 4266 (4971)          | 5543 (7511) | 0.125            |
| Housework Activity (LAPAQ)         |                      |             |                  |                      |             |                  |
| <i>Heavy (min/week)</i>            | 0 (2)                | 192 (292)   | <b>&lt;0.001</b> | 47 (81)              | 198 (335)   | <b>&lt;0.001</b> |
| <i>Light (min/week)</i>            | 198 (363)            | 584 (593)   | <b>&lt;0.001</b> | 95 (87)              | 838 (592)   | <b>&lt;0.001</b> |
| <i>Total (MET min/week)</i>        | 496 (908)            | 2228 (2079) | <b>&lt;0.001</b> | 425 (458)            | 2887 (2120) | <b>&lt;0.001</b> |
| <b>Older</b>                       |                      |             |                  |                      |             |                  |
| <i>n</i>                           | 132                  | 108         |                  | 103                  | 137         |                  |
| Sex, Female (n (%))                | 63 (48)              | 74 (69)     |                  | 39 (38)              | 98 (72)     |                  |
| Age (Years)                        | 77 (6)               | 73 (6)      | <b>&lt;0.001</b> | 77 (7)               | 74 (6)      | <b>0.004</b>     |
| Education (Years)                  | 6 (4)                | 7 (5)       | 0.168            | 7 (5)                | 7 (5)       | 0.764            |
| Height (m)                         | 1.57 (0.09)          | 1.57 (0.08) | 0.987            | 1.58 (0.08)          | 1.56 (0.08) | 0.064            |
| Weight (kg)                        | 60.1 (10.3)          | 58.5 (9.6)  | 0.192            | 60.4 (9.8)           | 58.6 (10.1) | 0.161            |
| Body Mass Index                    | 24.5 (3.7)           | 23.8 (3.3)  | 0.102            | 24.2 (3.5)           | 24.1 (3.5)  | 0.778            |
| Physical Activity (GPAQ)           |                      |             |                  |                      |             |                  |
| <i>Recreational (MET min/week)</i> | 828 (1053)           | 890 (1047)  | 0.650            | 867 (1181)           | 847 (941)   | 0.884            |
| <i>Transport (MET min/week)</i>    | 1561 (1565)          | 1836 (2050) | 0.253            | 1554 (1964)          | 1783 (1667) | 0.340            |
| <i>Occupational (MET min/week)</i> | 676 (2269)           | 401 (1397)  | 0.251            | 547 (2113)           | 557 (1783)  | 0.968            |
| <i>Total (MET min/week)</i>        | 3065 (2731)          | 3127 (2531) | 0.856            | 2968 (2968)          | 3187 (2366) | 0.537            |
| Housework Activity (LAPAQ)         |                      |             |                  |                      |             |                  |

|    |                         |             |            |                  |           |            |                  |
|----|-------------------------|-------------|------------|------------------|-----------|------------|------------------|
| 1  |                         |             |            |                  |           |            |                  |
| 2  |                         |             |            |                  |           |            |                  |
| 3  |                         |             |            |                  |           |            |                  |
| 4  | <i>Heavy (min/week)</i> | 0 (0)       | 131 (140)  | <b>&lt;0.001</b> | 31 (72)   | 80 (134)   | <b>&lt;0.001</b> |
| 5  | <i>Light (min/week)</i> | 446 (508)   | 684 (568)  | <b>&lt;0.001</b> | 89 (93)   | 902 (485)  | <b>&lt;0.001</b> |
| 6  |                         |             |            |                  |           |            |                  |
| 7  | <i>Total (MET</i>       |             | 2236 (1584 |                  |           | 2576 (1349 | <b>&lt;0.001</b> |
| 8  | <i>min/week)</i>        | 1116 (1270) | )          | <b>&lt;0.001</b> | 347 (377) | )          | <b>&lt;0.001</b> |
| 9  |                         |             |            |                  |           |            |                  |
| 10 |                         |             |            |                  |           |            |                  |
| 11 |                         |             |            |                  |           |            |                  |
| 12 |                         |             |            |                  |           |            |                  |
| 13 |                         |             |            |                  |           |            |                  |
| 14 |                         |             |            |                  |           |            |                  |
| 15 |                         |             |            |                  |           |            |                  |
| 16 |                         |             |            |                  |           |            |                  |
| 17 |                         |             |            |                  |           |            |                  |
| 18 |                         |             |            |                  |           |            |                  |
| 19 |                         |             |            |                  |           |            |                  |
| 20 |                         |             |            |                  |           |            |                  |
| 21 |                         |             |            |                  |           |            |                  |
| 22 |                         |             |            |                  |           |            |                  |
| 23 |                         |             |            |                  |           |            |                  |
| 24 |                         |             |            |                  |           |            |                  |
| 25 |                         |             |            |                  |           |            |                  |
| 26 |                         |             |            |                  |           |            |                  |
| 27 |                         |             |            |                  |           |            |                  |
| 28 |                         |             |            |                  |           |            |                  |
| 29 |                         |             |            |                  |           |            |                  |
| 30 |                         |             |            |                  |           |            |                  |
| 31 |                         |             |            |                  |           |            |                  |
| 32 |                         |             |            |                  |           |            |                  |
| 33 |                         |             |            |                  |           |            |                  |
| 34 |                         |             |            |                  |           |            |                  |
| 35 |                         |             |            |                  |           |            |                  |
| 36 |                         |             |            |                  |           |            |                  |
| 37 |                         |             |            |                  |           |            |                  |
| 38 |                         |             |            |                  |           |            |                  |
| 39 |                         |             |            |                  |           |            |                  |
| 40 |                         |             |            |                  |           |            |                  |
| 41 |                         |             |            |                  |           |            |                  |
| 42 |                         |             |            |                  |           |            |                  |
| 43 |                         |             |            |                  |           |            |                  |
| 44 |                         |             |            |                  |           |            |                  |
| 45 |                         |             |            |                  |           |            |                  |
| 46 |                         |             |            |                  |           |            |                  |
| 47 |                         |             |            |                  |           |            |                  |
| 48 |                         |             |            |                  |           |            |                  |
| 49 |                         |             |            |                  |           |            |                  |
| 50 |                         |             |            |                  |           |            |                  |
| 51 |                         |             |            |                  |           |            |                  |
| 52 |                         |             |            |                  |           |            |                  |
| 53 |                         |             |            |                  |           |            |                  |
| 54 |                         |             |            |                  |           |            |                  |
| 55 |                         |             |            |                  |           |            |                  |
| 56 |                         |             |            |                  |           |            |                  |
| 57 |                         |             |            |                  |           |            |                  |
| 58 |                         |             |            |                  |           |            |                  |
| 59 |                         |             |            |                  |           |            |                  |
| 60 |                         |             |            |                  |           |            |                  |

For peer review only

## Figure captions

**Figure 1.** Mean (SD) of global cognitive function and specific domains between high and low heavy housework groups, within younger and older adults. \* $p < 0.05$ , adjusted for age, sex and time spent on light housework per week.

**Figure 2.** Mean (SD) of global cognitive function and specific domains between high and low light housework groups, within younger and older adults. \* $p < 0.05$ , \*\* $p < 0.01$ , \*\*\* $p < 0.001$ , adjusted for age, sex, height, years of education, transport-related physical activity and time spent on heavy housework per week.

**Figure 3.** Mean (SD) of physical function measures including total short physical performance battery score (a), 6m habitual gait speed (b), and five-times repeated chair sit-to-stand time (c), and sensorimotor function measure including physiological profile assessment (d), between high and low heavy housework groups, within younger and older adults. \* $p < 0.05$ , adjusted for age, sex and time spent on light housework per week.

**Figure 4.** Mean (SD) of physical function measures including total short physical performance battery score (a), 6m habitual gait speed (b), and five-times repeated chair sit-to-stand time (c), and sensorimotor function measure including physiological profile assessment (d), between high and low light housework groups, within younger and older adults. All  $p > 0.05$ , adjusted for age, sex, height, years of education, transport-related physical activity and time spent on heavy housework per week.





Figure 1. Mean (SD) of global cognitive function and specific domains between high and low heavy housework groups, within younger and older adults. \* $p < 0.05$ , adjusted for age, sex and time spent on light housework per week.

294x190mm (124 x 124 DPI)



Figure 2. Mean (SD) of global cognitive function and specific domains between high and low light housework groups, within younger and older adults. \* $p < 0.05$ , \*\* $p < 0.01$ , \*\*\* $p < 0.001$ , adjusted for age, sex, height, years of education, transport-related physical activity and time spent on heavy housework per week.

294x190mm (124 x 124 DPI)

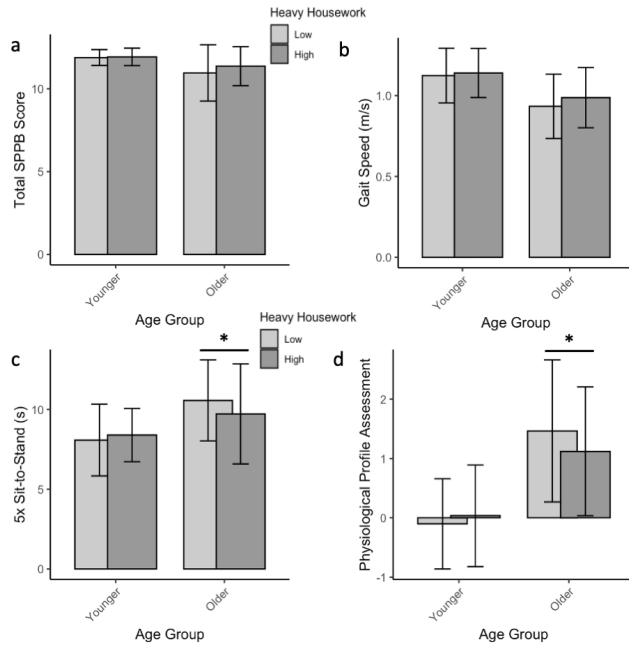

Figure 3. Mean (SD) of physical function measures including total short physical performance battery score (a), 6m habitual gait speed (b), and five-times repeated chair sit-to-stand time (c), and sensorimotor function measure including physiological profile assessment (d), between high and low heavy housework groups, within younger and older adults. \*p<0.05, adjusted for age, sex and time spent on light housework per week.

294x190mm (124 x 124 DPI)



Figure 4. Mean (SD) of physical function measures including total short physical performance battery score (a), 6m habitual gait speed (b), and five-times repeated chair sit-to-stand time (c), and sensorimotor function measure including physiological profile assessment (d), between high and low light housework groups, within younger and older adults. All  $p > 0.05$ , adjusted for age, sex, height, years of education, transport-related physical activity and time spent on heavy housework per week.

294x190mm (124 x 124 DPI)

**Supplementary Table S1.** Mean (SD) of cognitive, physical and sensorimotor functions stratified by heavy housework and light housework groups, between younger and older participants.

|                                    | Heavy Housework (HH) |                |                |                | Light Housework (LH) |                |                |                |
|------------------------------------|----------------------|----------------|----------------|----------------|----------------------|----------------|----------------|----------------|
|                                    | Younger              |                | Older          |                | Younger              |                | Older          |                |
|                                    | <i>Low</i>           | <i>High</i>    | <i>Low</i>     | <i>High</i>    | <i>Low</i>           | <i>High</i>    | <i>Low</i>     | <i>High</i>    |
| <i>n</i>                           | 100                  | 149            | 132            | 108            | 137                  | 112            | 103            | 137            |
| <b>Cognitive function (Scores)</b> |                      |                |                |                |                      |                |                |                |
| RBANS                              | 226<br>(31)          | 220<br>(30)    | 164<br>(38)    | 177<br>(33)    | 230<br>(27)          | 214<br>(32)    | 165<br>(40)    | 174<br>(32)    |
| Immediate-Memory                   | 47 (8)               | 46 (7)         | 35 (10)        | 38 (8)         | 48 (7)               | 44 (8)         | 34 (10)        | 38 (7)         |
| Delayed-Memory                     | 52 (7)               | 51 (7)         | 40 (11)        | 42 (9)         | 53 (6)               | 50 (7)         | 39 (11)        | 42 (8)         |
| Visuospatial-Construction          | 35 (4)               | 35 (5)         | 29 (6)         | 31 (6)         | 36 (4)               | 34 (5)         | 30 (6)         | 30 (6)         |
| Language                           | 28 (6)               | 29 (5)         | 24 (6)         | 25 (5)         | 29 (6)               | 28 (5)         | 24 (6)         | 25 (5)         |
| Attention                          | 64 (14)              | 60 (13)        | 36 (13)        | 41 (14)        | 65 (12)              | 57 (14)        | 38 (14)        | 39 (14)        |
| <b>Physical function</b>           |                      |                |                |                |                      |                |                |                |
| SPPB score                         | 11.9<br>(0.5)        | 11.9<br>(0.5)  | 11.0<br>(1.7)  | 11.4<br>(1.2)  | 11.9<br>(0.3)        | 11.9<br>(0.7)  | 11.1<br>(1.5)  | 11.2<br>(1.5)  |
| Gait Speed (m/s)                   | 1.1<br>(0.2)         | 1.1<br>(0.2)   | 0.9<br>(0.2)   | 1.0<br>(0.2)   | 1.2<br>(0.2)         | 1.1<br>(0.1)   | 0.9<br>(0.2)   | 1.0<br>(0.2)   |
| 5x Sit-to-stand (s)                | 8.1<br>(2.2)         | 8.4<br>(1.7)   | 10.6<br>(2.5)  | 9.7<br>(3.1)   | 8.1<br>(2.1)         | 8.5<br>(1.7)   | 10.2<br>(2.5)  | 10.2<br>(3.1)  |
| <b>Sensorimotor function</b>       |                      |                |                |                |                      |                |                |                |
| Physiological Profile Assessment   | -0.10<br>(0.76)      | 0.04<br>(0.86) | 1.46<br>(1.20) | 1.12<br>(1.09) | -0.19<br>(0.73)      | 0.19<br>(0.87) | 1.45<br>(1.24) | 1.20<br>(1.08) |

# Reporting checklist for cross sectional study.

Based on the STROBE cross sectional guidelines.

## Instructions to authors

Complete this checklist by entering the page numbers from your manuscript where readers will find each of the items listed below.

Your article may not currently address all the items on the checklist. Please modify your text to include the missing information. If you are certain that an item does not apply, please write "n/a" and provide a short explanation.

Upload your completed checklist as an extra file when you submit to a journal.

In your methods section, say that you used the STROBE cross sectional reporting guidelines, and cite them as:

von Elm E, Altman DG, Egger M, Pocock SJ, Gøtzsche PC, Vandenbroucke JP. The Strengthening the Reporting of Observational Studies in Epidemiology (STROBE) Statement: guidelines for reporting observational studies.

|                           | Reporting Item                                                                                                      | Page Number |
|---------------------------|---------------------------------------------------------------------------------------------------------------------|-------------|
| <b>Title and abstract</b> |                                                                                                                     |             |
| Title                     | <a href="#">#1a</a> Indicate the study's design with a commonly used term in the title or the abstract              | 1           |
| Abstract                  | <a href="#">#1b</a> Provide in the abstract an informative and balanced summary of what was done and what was found | 2           |
| <b>Introduction</b>       |                                                                                                                     |             |
| Background / rationale    | <a href="#">#2</a> Explain the scientific background and rationale for the investigation being reported             | 5           |
| Objectives                | <a href="#">#3</a> State specific objectives, including any prespecified hypotheses                                 | 6           |
| <b>Methods</b>            |                                                                                                                     |             |
| Study design              | <a href="#">#4</a> Present key elements of study design early in the paper                                          | 7           |
| Setting                   | <a href="#">#5</a> Describe the setting, locations, and relevant dates, including periods of                        | 6           |

|    |                      |                                                                                                              |        |
|----|----------------------|--------------------------------------------------------------------------------------------------------------|--------|
|    |                      | recruitment, exposure, follow-up, and data collection                                                        |        |
| 1  |                      |                                                                                                              |        |
| 2  |                      |                                                                                                              |        |
| 3  | Eligibility criteria | <a href="#">#6a</a> Give the eligibility criteria, and the sources and methods of selection of participants. | 7      |
| 4  |                      |                                                                                                              |        |
| 5  |                      |                                                                                                              |        |
| 6  |                      | <a href="#">#7</a> Clearly define all outcomes, exposures, predictors, potential                             | 7-10   |
| 7  |                      | confounders, and effect modifiers. Give diagnostic criteria, if applicable                                   |        |
| 8  |                      |                                                                                                              |        |
| 9  |                      |                                                                                                              |        |
| 10 | Data sources /       | <a href="#">#8</a> For each variable of interest give sources of data and details of methods                 | 7-10   |
| 11 | measurement          | of assessment (measurement). Describe comparability of assessment                                            |        |
| 12 |                      | methods if there is more than one group. Give information separately                                         |        |
| 13 |                      | for for exposed and unexposed groups if applicable.                                                          |        |
| 14 |                      |                                                                                                              |        |
| 15 |                      |                                                                                                              |        |
| 16 |                      |                                                                                                              |        |
| 17 | Bias                 | <a href="#">#9</a> Describe any efforts to address potential sources of bias                                 | NA     |
| 18 |                      |                                                                                                              |        |
| 19 | Study size           | <a href="#">#10</a> Explain how the study size was arrived at                                                | 10     |
| 20 |                      |                                                                                                              |        |
| 21 | Quantitative         | <a href="#">#11</a> Explain how quantitative variables were handled in the analyses. If                      | 10     |
| 22 | variables            | applicable, describe which groupings were chosen, and why                                                    |        |
| 23 |                      |                                                                                                              |        |
| 24 |                      |                                                                                                              |        |
| 25 | Statistical          | <a href="#">#12a</a> Describe all statistical methods, including those used to control for                   | 10, 12 |
| 26 | methods              | confounding                                                                                                  |        |
| 27 |                      |                                                                                                              |        |
| 28 |                      |                                                                                                              |        |
| 29 | Statistical          | <a href="#">#12b</a> Describe any methods used to examine subgroups and interactions                         | 10     |
| 30 | methods              |                                                                                                              |        |
| 31 |                      |                                                                                                              |        |
| 32 |                      |                                                                                                              |        |
| 33 | Statistical          | <a href="#">#12c</a> Explain how missing data were addressed                                                 | NA     |
| 34 | methods              |                                                                                                              |        |
| 35 |                      |                                                                                                              |        |
| 36 |                      |                                                                                                              |        |
| 37 | Statistical          | <a href="#">#12d</a> If applicable, describe analytical methods taking account of sampling                   | NA     |
| 38 | methods              | strategy                                                                                                     |        |
| 39 |                      |                                                                                                              |        |
| 40 |                      |                                                                                                              |        |
| 41 | Statistical          | <a href="#">#12e</a> Describe any sensitivity analyses                                                       | NA     |
| 42 | methods              |                                                                                                              |        |
| 43 |                      |                                                                                                              |        |
| 44 | <b>Results</b>       |                                                                                                              |        |
| 45 |                      |                                                                                                              |        |
| 46 | Participants         | <a href="#">#13a</a> Report numbers of individuals at each stage of study—eg numbers                         | 11     |
| 47 |                      | potentially eligible, examined for eligibility, confirmed eligible,                                          |        |
| 48 |                      | included in the study, completing follow-up, and analysed. Give                                              |        |
| 49 |                      | information separately for for exposed and unexposed groups if                                               |        |
| 50 |                      | applicable.                                                                                                  |        |
| 51 |                      |                                                                                                              |        |
| 52 |                      |                                                                                                              |        |
| 53 |                      |                                                                                                              |        |
| 54 |                      |                                                                                                              |        |
| 55 | Participants         | <a href="#">#13b</a> Give reasons for non-participation at each stage                                        | NA     |
| 56 |                      |                                                                                                              |        |
| 57 | Participants         | <a href="#">#13c</a> Consider use of a flow diagram                                                          | NA     |
| 58 |                      |                                                                                                              |        |
| 59 |                      |                                                                                                              |        |
| 60 |                      |                                                                                                              |        |

|    |                    |                      |                                                                                                                                                                                                                   |       |
|----|--------------------|----------------------|-------------------------------------------------------------------------------------------------------------------------------------------------------------------------------------------------------------------|-------|
| 1  | Descriptive data   | <a href="#">#14a</a> | Give characteristics of study participants (eg demographic, clinical, social) and information on exposures and potential confounders. Give information separately for exposed and unexposed groups if applicable. | 11    |
| 2  |                    |                      |                                                                                                                                                                                                                   |       |
| 3  |                    |                      |                                                                                                                                                                                                                   |       |
| 4  |                    |                      |                                                                                                                                                                                                                   |       |
| 5  |                    |                      |                                                                                                                                                                                                                   |       |
| 6  | Descriptive data   | <a href="#">#14b</a> | Indicate number of participants with missing data for each variable of interest                                                                                                                                   | NA    |
| 7  |                    |                      |                                                                                                                                                                                                                   |       |
| 8  |                    |                      |                                                                                                                                                                                                                   |       |
| 9  |                    |                      |                                                                                                                                                                                                                   |       |
| 10 | Outcome data       | <a href="#">#15</a>  | Report numbers of outcome events or summary measures. Give information separately for exposed and unexposed groups if applicable.                                                                                 | 12-14 |
| 11 |                    |                      |                                                                                                                                                                                                                   |       |
| 12 |                    |                      |                                                                                                                                                                                                                   |       |
| 13 |                    |                      |                                                                                                                                                                                                                   |       |
| 14 | Main results       | <a href="#">#16a</a> | Give unadjusted estimates and, if applicable, confounder-adjusted estimates and their precision (eg, 95% confidence interval). Make clear which confounders were adjusted for and why they were included          | 12-14 |
| 15 |                    |                      |                                                                                                                                                                                                                   |       |
| 16 |                    |                      |                                                                                                                                                                                                                   |       |
| 17 |                    |                      |                                                                                                                                                                                                                   |       |
| 18 |                    |                      |                                                                                                                                                                                                                   |       |
| 19 | Main results       | <a href="#">#16b</a> | Report category boundaries when continuous variables were categorized                                                                                                                                             | NA    |
| 20 |                    |                      |                                                                                                                                                                                                                   |       |
| 21 | Main results       | <a href="#">#16c</a> | If relevant, consider translating estimates of relative risk into absolute risk for a meaningful time period                                                                                                      | NA    |
| 22 |                    |                      |                                                                                                                                                                                                                   |       |
| 23 |                    |                      |                                                                                                                                                                                                                   |       |
| 24 |                    |                      |                                                                                                                                                                                                                   |       |
| 25 | Other analyses     | <a href="#">#17</a>  | Report other analyses done—e.g., analyses of subgroups and interactions, and sensitivity analyses                                                                                                                 | NA    |
| 26 |                    |                      |                                                                                                                                                                                                                   |       |
| 27 |                    |                      |                                                                                                                                                                                                                   |       |
| 28 |                    |                      |                                                                                                                                                                                                                   |       |
| 29 | <b>Discussion</b>  |                      |                                                                                                                                                                                                                   |       |
| 30 |                    |                      |                                                                                                                                                                                                                   |       |
| 31 | Key results        | <a href="#">#18</a>  | Summarise key results with reference to study objectives                                                                                                                                                          | 14    |
| 32 |                    |                      |                                                                                                                                                                                                                   |       |
| 33 |                    |                      |                                                                                                                                                                                                                   |       |
| 34 | Limitations        | <a href="#">#19</a>  | Discuss limitations of the study, taking into account sources of potential bias or imprecision. Discuss both direction and magnitude of any potential bias.                                                       | 17    |
| 35 |                    |                      |                                                                                                                                                                                                                   |       |
| 36 |                    |                      |                                                                                                                                                                                                                   |       |
| 37 |                    |                      |                                                                                                                                                                                                                   |       |
| 38 |                    |                      |                                                                                                                                                                                                                   |       |
| 39 | Interpretation     | <a href="#">#20</a>  | Give a cautious overall interpretation considering objectives, limitations, multiplicity of analyses, results from similar studies, and other relevant evidence.                                                  | 14-17 |
| 40 |                    |                      |                                                                                                                                                                                                                   |       |
| 41 |                    |                      |                                                                                                                                                                                                                   |       |
| 42 |                    |                      |                                                                                                                                                                                                                   |       |
| 43 |                    |                      |                                                                                                                                                                                                                   |       |
| 44 | Generalisability   | <a href="#">#21</a>  | Discuss the generalisability (external validity) of the study results                                                                                                                                             | 17    |
| 45 |                    |                      |                                                                                                                                                                                                                   |       |
| 46 |                    |                      |                                                                                                                                                                                                                   |       |
| 47 | <b>Other</b>       |                      |                                                                                                                                                                                                                   |       |
| 48 | <b>Information</b> |                      |                                                                                                                                                                                                                   |       |
| 49 |                    |                      |                                                                                                                                                                                                                   |       |
| 50 |                    |                      |                                                                                                                                                                                                                   |       |
| 51 | Funding            | <a href="#">#22</a>  | Give the source of funding and the role of the funders for the present study and, if applicable, for the original study on which the present article is based                                                     | 18    |
| 52 |                    |                      |                                                                                                                                                                                                                   |       |
| 53 |                    |                      |                                                                                                                                                                                                                   |       |
| 54 |                    |                      |                                                                                                                                                                                                                   |       |
| 55 |                    |                      |                                                                                                                                                                                                                   |       |

The STROBE checklist is distributed under the terms of the Creative Commons Attribution License CC-BY.

This checklist was completed on 05. April 2021 using <https://www.goodreports.org/>, a tool made by the

[EQUATOR Network](#) in collaboration with [Penelope.ai](#)

For peer review only - <http://bmjopen.bmj.com/site/about/guidelines.xhtml>
