# Supplementary material for: Cross-sectional associations of housework with cognitive, physical and sensorimotor functions in younger and older community-dwelling adults: the Yishun Study
Source: PubMed Central journal article supplement — BMJ Open. 2021 Oct 26;11(11):e052557. doi: 10.1136/bmjopen-2021-052557 (PMC8638158; doi:10.1136/bmjopen-2021-052557), 2021-10-26
Supplement: bmjopen-2021-052557supp001.pdf [file bmjopen-2021-052557supp001.pdf]

**Supplementary Table S1.** Mean (SD) of cognitive, physical and sensorimotor functions stratified by heavy housework and light housework groups, between younger and older participants.

|                                    | Heavy Housework (HH) |                |                |                | Light Housework (LH) |                |                |                |
|------------------------------------|----------------------|----------------|----------------|----------------|----------------------|----------------|----------------|----------------|
|                                    | Younger              |                | Older          |                | Younger              |                | Older          |                |
|                                    | Low                  | High           | Low            | High           | Low                  | High           | Low            | High           |
| <i>n</i>                           | 100                  | 149            | 132            | 108            | 137                  | 112            | 103            | 137            |
| <b>Cognitive function (Scores)</b> |                      |                |                |                |                      |                |                |                |
| RBANS                              | 226<br>(31)          | 220<br>(30)    | 164<br>(38)    | 177<br>(33)    | 230<br>(27)          | 214<br>(32)    | 165<br>(40)    | 174<br>(32)    |
| Immediate-Memory                   | 47 (8)               | 46 (7)         | 35 (10)        | 38 (8)         | 48 (7)               | 44 (8)         | 34 (10)        | 38 (7)         |
| Delayed-Memory                     | 52 (7)               | 51 (7)         | 40 (11)        | 42 (9)         | 53 (6)               | 50 (7)         | 39 (11)        | 42 (8)         |
| Visuospatial-Construction          | 35 (4)               | 35 (5)         | 29 (6)         | 31 (6)         | 36 (4)               | 34 (5)         | 30 (6)         | 30 (6)         |
| Language                           | 28 (6)               | 29 (5)         | 24 (6)         | 25 (5)         | 29 (6)               | 28 (5)         | 24 (6)         | 25 (5)         |
| Attention                          | 64 (14)              | 60 (13)        | 36 (13)        | 41 (14)        | 65 (12)              | 57 (14)        | 38 (14)        | 39 (14)        |
| <b>Physical function</b>           |                      |                |                |                |                      |                |                |                |
| SPPB score                         | 11.9<br>(0.5)        | 11.9<br>(0.5)  | 11.0<br>(1.7)  | 11.4<br>(1.2)  | 11.9<br>(0.3)        | 11.9<br>(0.7)  | 11.1<br>(1.5)  | 11.2<br>(1.5)  |
| Gait Speed (m/s)                   | 1.1<br>(0.2)         | 1.1<br>(0.2)   | 0.9<br>(0.2)   | 1.0<br>(0.2)   | 1.2<br>(0.2)         | 1.1<br>(0.1)   | 0.9<br>(0.2)   | 1.0<br>(0.2)   |
| 5x Sit-to-stand (s)                | 8.1<br>(2.2)         | 8.4<br>(1.7)   | 10.6<br>(2.5)  | 9.7<br>(3.1)   | 8.1<br>(2.1)         | 8.5<br>(1.7)   | 10.2<br>(2.5)  | 10.2<br>(3.1)  |
| <b>Sensorimotor function</b>       |                      |                |                |                |                      |                |                |                |
| Physiological Profile Assessment   | -0.10<br>(0.76)      | 0.04<br>(0.86) | 1.46<br>(1.20) | 1.12<br>(1.09) | -0.19<br>(0.73)      | 0.19<br>(0.87) | 1.45<br>(1.24) | 1.20<br>(1.08) |
